# Supplementary material for: Comparative Transcriptome Analysis Reveals Relationship among mRNAs, lncRNAs, and circRNAs of Slow Transit Constipation
Source: Biomed Res Int. 2021 Aug 23;2021:6672899. doi: 10.1155/2021/6672899 (PMC8427675; doi:10.1155/2021/6672899)
Supplement: Supplementary 1 — Table S1: number of RNA-sequencing reads and mapping results. GO and KEGG results of DE mRNA, lncRNA, and circRNAs in the Lop and normal rats. [file 6672899.f1.xlsx]

## Sheet: mRNA.diff
transcript_name	chr	strand	start	end	transcript_name	num_exons	length	gene_id	gene_name	K1_FPKM	K2_FPKM	K3_FPKM	K4_FPKM	M1_FPKM	M2_FPKM	M3_FPKM	M4_FPKM	M5_FPKM	log2FoldChange	pvalue
MSTRG.12341.2	2	+	122337743	122444878	MSTRG.12341.2	33	3832	ENSRNOG00000052116	Atp11b	1.56204	1.37368	1.72465	3.84422	0.022629	0.011698	0.019091	0.026088	0.009217	-6.67781	7.16434e-47
ENSRNOT00000029764	7	+	37101391	37186534	ENSRNOT00000029764	28	4236	ENSRNOG00000021681	Eea1	0.692927	0.910682	0.908079	1.16867	4.98614	3.97198	3.79517	5.604	6.1513	2.55257	6.62124e-29
ENSRNOT00000080288	8	+	44847157	44975457	ENSRNOT00000080288	7	3901	ENSRNOG00000053239	Clmp	9.81218	7.64208	9.15277	8.59852	0.523449	0.238025	0.711829	0.475532	0.857931	-3.82763	2.45516e-25
MSTRG.21613.4	7	-	143523803	143606005	MSTRG.21613.4	11	2052	ENSRNOG00000009779	Krt8	0	0.000348	0	0	26.4142	29.9013	24.5642	285.84	7.15207	16.3936	3.32372e-24
MSTRG.8782.1	15	-	58143439	58171049	MSTRG.8782.1	9	1173	ENSRNOG00000001037	Gpalpp1	1.60501	3.43244	1.11101	1.53785	0	0	0	0	0	-10.935	2.77215e-23
MSTRG.812.7	1	+	85002698	85086705	MSTRG.812.7	15	5999	ENSRNOG00000019129	Fcgbp	0	0	18.2656	33.1625	0	0	0	0	0	-30	5.77312e-21
MSTRG.4934.1	10	-	109432503	109520846	MSTRG.4934.1	6	1847	ENSRNOG00000036701	LOC100361457	0	0	0	0	364.532	0	87.6144	0	0	29.8638	2.09368e-20
MSTRG.8342.2	15	-	18750156	18882959	MSTRG.8342.2	46	8900	ENSRNOG00000009470	Flnb	0	0	0	0	22.8174	0.013164	24.0958	0	0	29.709	3.27735e-20
MSTRG.7530.1	14	-	17316083	17436897	MSTRG.7530.1	25	3861	ENSRNOG00000002301	Uso1	7.31362	0	0	20.8722	0	0	0	0	0	-28.7336	2.30987e-19
MSTRG.8759.2	15	+	56756797	56776348	MSTRG.8759.2	9	1093	ENSRNOG00000009512	Esd	37.4835	0	0	27.5294	0	0	0	0	0	-28.3516	6.81898e-19
MSTRG.12705.3	2	+	188141350	188215699	MSTRG.12705.3	34	9875	ENSRNOG00000020297	Gon4l	0	2.07936	0	4.13478	0	0	0	0	0	-28.1596	1.16832e-18
ENSRNOT00000009440	10	+	38692211	38773021	ENSRNOT00000009440	21	10168	ENSRNOG00000006965	Aff4	0	0	0	0	6.43959	5.35539	0	0	0	27.9632	4.38825e-18
ENSRNOT00000085745	8	-	71371370	71533459	ENSRNOT00000085745	14	4078	ENSRNOG00000016121	Trip4	0	0	5.21499	4.43642	0	0	0	0	0	-27.5019	7.20019e-18
ENSRNOT00000008193	7	-	60385688	60416925	ENSRNOT00000008193	10	7168	ENSRNOG00000005927	Cpsf6	1.71002	0	2.49958	0	0	0	0	0	0	-27.1449	1.8983e-17
MSTRG.305.1	1	+	47972341	48025619	MSTRG.305.1	10	1318	ENSRNOG00000019189	Acat2	11.5251	0	0.00809	8.50307	0	0	0	0	0	-26.9899	2.88109e-17
MSTRG.1636.9	1	-	174137153	174289914	MSTRG.1636.9	22	5045	ENSRNOG00000013934	St5	0	0	0	0	0	0	6.19332	5.13164	3.17185	27.2618	2.89311e-17
MSTRG.16641.9	4	+	98457369	98523474	MSTRG.16641.9	4	933	ENSRNOG00000049829	AABR07060872.1	0	0	0	0	0	0	11.358	0	49.0501	26.9168	7.19293e-17
MSTRG.16641.13	4	+	98457374	98523474	MSTRG.16641.13	4	925	ENSRNOG00000049829	AABR07060872.1	0	0	6.44549	11.279	0	0	0	0	0	-26.3119	1.73853e-16
MSTRG.3677.3	10	+	46940965	46955486	MSTRG.3677.3	23	4239	ENSRNOG00000003948	Llgl1	0	0	0	0	5.15461	2.7034	1.91138	0	0	26.4783	2.25116e-16
MSTRG.21598.3	7	+	143059778	143075906	MSTRG.21598.3	10	1339	ENSRNOG00000008057	Krt7	6.71822	0	0	4.14697	0	0	0	0	0	-26.1828	2.43589e-16
ENSRNOT00000036848	14	-	83347552	83412375	ENSRNOT00000036848	34	4753	ENSRNOG00000018412	Sfi1	0	0	0	0	2.43745	0	2.90586	2.55202	0	26.3329	3.27377e-16
ENSRNOT00000074874	14	-	2463643	2474780	ENSRNOT00000074874	3	2792	ENSRNOG00000048308	Dr1	0	0	0	0	0	6.52563	8.29293	0	0	26.2312	4.24754e-16
ENSRNOT00000072694	20	-	4269598	4279911	ENSRNOT00000072694	9	1617	ENSRNOG00000046294	RGD1624210	5.1767	0	2.21179	0	0	0	0	0	0	-25.9059	4.99538e-16
MSTRG.19325.6	6	+	38473815	38777806	MSTRG.19325.6	53	8306	ENSRNOG00000024503	Nbas	0	0	0	0	0	0	2.49385	1.13151	0	26.0118	7.43029e-16
MSTRG.14767.3	3	-	51137109	51299084	MSTRG.14767.3	15	5294	ENSRNOG00000027016	Cobll1	0.178842	0	1.8666	0	0	0	0	0	0	-25.7279	7.8949e-16
ENSRNOT00000029435	7	-	27226569	27240528	ENSRNOT00000029435	18	2799	ENSRNOG00000026963	Hsp90b1	0	0	0	0	0	0	0	5.81452	4.49623	25.9443	8.81806e-16
MSTRG.9942.19	17	+	31493145	31498651	MSTRG.9942.19	5	1603	ENSRNOG00000017558	Tubb2a	4.89471	0.700323	0	0	0	0	0	0	0	-25.5311	1.30481e-15
ENSRNOT00000083068	5	+	59491136	59509131	ENSRNOT00000083068	6	1088	ENSRNOG00000014635	Clta	0	0	0	0	9.35172	8.53935	0	0	5.32862	25.7859	1.31498e-15
MSTRG.13501.31	20	-	2878047	2942133	MSTRG.13501.31	6	1124	ENSRNOG00000049946	AABR07044340.1	7.55052	0	4.66055	0	0	0	0	0	0	-25.5168	1.35104e-15
MSTRG.15943.7	3	+	176093653	176099987	MSTRG.15943.7	8	2077	ENSRNOG00000009355	Ogfr	0	0	0	0	4.66039	4.41001	0	2.87123	0	25.7561	1.41747e-15
MSTRG.8870.13	15	-	93768292	93868443	MSTRG.8870.13	40	6322	ENSRNOG00000010479	Mycbp2	0	0	0	0	0	0	0	0.662179	3.35026	25.7359	1.49106e-15
MSTRG.8974.5	16	+	6048016	6069291	MSTRG.8974.5	14	2083	ENSRNOG00000015280	Actr8	0	0	0	0	3.19292	0	4.57009	3.63982	0	25.6945	1.65476e-15
ENSRNOT00000002006	12	+	29012852	29079729	ENSRNOT00000002006	25	2763	ENSRNOG00000050193	LOC100912262	0	1.41172	0	2.38133	0	0	0	0	0	-25.3143	2.25739e-15
ENSRNOT00000091473	4	-	152087379	152380184	ENSRNOT00000091473	20	8532	ENSRNOG00000009264	Erc1	0	0	0	0	0	1.3607	0.754596	0	0	25.2947	4.47534e-15
ENSRNOT00000024529	8	-	116503160	116531784	ENSRNOT00000024529	25	2994	ENSRNOG00000018153	Rbm5	0	0.18854	0	1.77448	0	0	0	0	0	-24.9327	5.88178e-15
MSTRG.16213.2	4	+	40004654	40005355	MSTRG.16213.2	2	594	ENSRNOG00000031045	LOC100911252	8.41958	0.912576	0	0	0	0	0	0	0	-24.879	6.7214e-15
MSTRG.13231.14	2	-	231845012	231882044	MSTRG.13231.14	10	1424	ENSRNOG00000048989	Larp7	0	0	0	0	0	0	0	6.56832	4.38884	25.1105	7.04407e-15
ENSRNOT00000076467	5	+	80920568	81150929	ENSRNOT00000076467	22	5061	ENSRNOG00000033527	Pappa1	0	0	1.52447	0.682623	0	0	0	0	0	-24.8308	7.54889e-15
MSTRG.687.2	1	-	80730499	80746960	MSTRG.687.2	10	2274	ENSRNOG00000043416	Bcl3	0	0	0	0	0	2.04529	0	4.74452	0	25.0777	7.63353e-15
ENSRNOT00000086879	17	-	45279162	45285060	ENSRNOT00000086879	5	2022	ENSRNOG00000052959	Zscan12	0.88415	0	0	1.6231	0	0	0	0	0	-24.7365	9.56731e-15
ENSRNOT00000065376	1	-	226770976	226791833	ENSRNOT00000065376	12	1888	ENSRNOG00000020872	Cd5	0	0.572935	1.61249	0	0	0	0	0	0	-24.4362	2.00021e-14
MSTRG.916.3	1	-	89113071	89124930	MSTRG.916.3	20	2355	ENSRNOG00000024266	Haus5	0	0	0	0	0	1.6195	0	0	3.2177	24.6741	2.03619e-14
ENSRNOT00000025365	2	+	205617220	205660611	ENSRNOT00000025365	19	4962	ENSRNOG00000018716	Dennd2c	0	0	0	0	1.02075	0	0	0.000841	0.947188	24.4817	3.23359e-14
MSTRG.133.1	1	-	20844523	20962526	MSTRG.133.1	18	4032	ENSRNOG00000012346	Epb41l2	0	0	0	0	0.183834	0	1.97023	0	0	24.2851	5.16802e-14
MSTRG.18392.1	5	-	138628482	138629026	MSTRG.18392.1	2	522	ENSRNOG00000004426	Rps27a	0	0	0	0	0	0	0	10.0921	13.3295	24.2802	5.22185e-14
ENSRNOT00000017417	1	-	20893995	20962526	ENSRNOT00000017417	14	2097	ENSRNOG00000012346	Epb41l2	0.23372	0	0	2.28049	0	0	0	0	0	-23.8119	8.95728e-14
ENSRNOT00000029635	9	-	92753957	92775816	ENSRNOT00000029635	6	863	ENSRNOG00000017273	RGD1563917	1.36926	0.837069	3.79612	0.377642	0.000948	0	0	0	0	-9.6045	1.20453e-13
ENSRNOT00000016540	1	-	162381253	162385575	ENSRNOT00000016540	2	1232	ENSRNOG00000012404	Thrsp	193.304	21.7124	45.9111	52.1739	3.33225	2.63726	1.9196	3.11587	1.1519	-4.87598	1.64255e-13
MSTRG.7893.4	14	-	80678950	80680682	MSTRG.7893.4	4	522	ENSRNOG00000054319	LOC103690128	0	0	0	0	5.88672	5.32675	0	0	0	23.746	1.8354e-13
MSTRG.16770.5	4	-	114817814	114820127	MSTRG.16770.5	5	1221	ENSRNOG00000061902	LOC103692173	0	0	0	0	0	0.509702	0	4.27171	0	23.7253	1.92596e-13
MSTRG.5778.4	12	+	7082392	7088211	MSTRG.5778.4	6	1012	ENSRNOG00000029813	AABR07035218.1	0	0	0	0	2.29096	0	0	0	2.11496	23.3887	4.18906e-13
MSTRG.5778.17	12	+	7085141	7088072	MSTRG.5778.17	5	700	ENSRNOG00000029813	AABR07035218.1	0	0	0	0	0	0	2.44562	3.18392	0	23.1684	6.92568e-13
ENSRNOT00000062006	5	-	4946694	4975436	ENSRNOT00000062006	4	1891	ENSRNOG00000040289	Xkr9	0	0	0	0	0.600752	1.21061	0	0	0	22.9875	1.04345e-12
MSTRG.21613.13	7	-	143596514	143605583	MSTRG.21613.13	10	1863	ENSRNOG00000009779	Krt8	0	0	0	0	293.847	675.328	180.555	0	869.61	19.4256	1.22526e-12
ENSRNOT00000065847	4	-	115448708	115453659	ENSRNOT00000065847	6	1043	ENSRNOG00000013712	Tex261	0.317073	0.262072	0.253254	0.314285	29.8762	0.23353	32.6824	30.5029	31.3822	6.56196	5.11881e-12
MSTRG.13688.23	20	+	5351970	5377440	MSTRG.13688.23	5	821	ENSRNOG00000030712	RT1-A2	0	0	0	0	1.04255	0	0	0	3.36279	22.0098	8.9959e-12
ENSRNOT00000079359	6	+	99433550	99436289	ENSRNOT00000079359	3	2403	ENSRNOG00000006472	Hspa2	6.97741	0.201908	0.239429	3.27676	0	0	0	0	0	-12.4294	1.52114e-11
ENSRNOT00000056995	9	-	92593910	92616165	ENSRNOT00000056995	13	1761	ENSRNOG00000033747	Sp110	0.549136	0.077555	0.277492	1.06575	0	0	0	0	0	-9.52959	1.98182e-11
ENSRNOT00000080101	17	+	53962444	53971443	ENSRNOT00000080101	4	5337	ENSRNOG00000016767	Ggps1	1.03176	1.1709	1.53667	0.008125	0.002403	0.0062	0.012938	0.005549	0.008137	-6.81518	4.4017e-11
MSTRG.20156.50	6	-	138631699	138816048	MSTRG.20156.50	3	441	ENSRNOG00000050912	AABR07065651.4	0	0	0	0	0	1.09006	0	4.03712	0	21.1034	6.1465e-11
ENSRNOT00000001856	12	-	41416218	41448668	ENSRNOT00000001856	22	3238	ENSRNOG00000001374	Rasal1	0.449824	0.67163	1.4478	0.1627	0.062498	0.04732	0.026442	0.02464	0.019272	-4.0638	5.62629e-10
ENSRNOT00000012455	5	+	154269118	154286544	ENSRNOT00000012455	8	1666	ENSRNOG00000009325	Fuca1	1.48877	1.20654	0.361861	1.54428	21.4727	2.41777	42.9484	75.4905	45.574	5.15192	7.1103e-10
ENSRNOT00000085678	6	-	138239270	138249382	ENSRNOT00000085678	5	1539	ENSRNOG00000034190	AABR07065625.1	13.7961	11.7248	20.0949	6.31373	0.429047	2.49247	0.849722	0.753081	0.614586	-3.526	1.82472e-09
MSTRG.15802.2	3	+	161297890	161304625	MSTRG.15802.2	16	2054	ENSRNOG00000015857	Ctsa	48.6725	0.084125	0.01111	57.6641	0.100597	0.044053	0.032707	0.039627	0.022643	-8.92849	8.49582e-09
ENSRNOT00000087509	X	-	45410546	45419817	ENSRNOT00000087509	2	1606	ENSRNOG00000060486	Ptges3l1	0.694955	0.899495	1.09555	0.858532	0.345537	0.469949	0.403379	0.416399	0.30064	-1.05541	8.6903e-09
ENSRNOT00000080616	13	-	113890272	113927877	ENSRNOT00000080616	26	6805	ENSRNOG00000034164	Cr2	6.68689	5.10454	23.0539	1.34464	0.046619	0.57229	0.130499	0.065313	0.098356	-5.47883	9.30251e-09
ENSRNOT00000018447	1	-	264160129	264172729	ENSRNOT00000018447	6	4475	ENSRNOG00000013552	Scd	304.723	44.1859	113.674	112.29	10.0297	6.52737	7.81138	6.52384	0.728178	-4.37058	1.06737e-08
ENSRNOT00000083239	4	+	102147211	102147775	ENSRNOT00000083239	2	445	ENSRNOG00000056052	AABR07060980.1	19.6059	25.6093	28.5171	21.308	11.1764	8.61163	12.3609	7.51165	9.12642	-1.14604	1.93801e-08
ENSRNOT00000001332	12	-	2233778	2245324	ENSRNOT00000001332	12	1995	ENSRNOG00000001005	Fcer2	0.713566	1.1747	3.70554	0.741684	0.032894	0.197554	0.046947	0.029928	0.03351	-4.35565	2.50156e-08
ENSRNOT00000026843	19	-	58236214	58399816	ENSRNOT00000026843	23	6694	ENSRNOG00000019791	Sipa1l2	0.000912	0	0.001438	0.001704	0.001415	0.001772	2.658	1.6984	1.54853	9.76148	2.84156e-08
ENSRNOT00000080892	9	-	101107074	101107535	ENSRNOT00000080892	1	462	ENSRNOG00000051286	LOC100911516	0.023442	41.4834	0.020371	153.03	0.017373	0.112056	0.082048	0.007462	0.030805	-9.61339	2.93099e-08
ENSRNOT00000084851	1	-	267417459	267463694	ENSRNOT00000084851	54	5536	ENSRNOG00000012110	Col17a1	0.753023	1.09518	0.815502	0.521143	0.225876	0.28968	0.160649	0.2948	0.193667	-1.64401	3.89127e-08
ENSRNOT00000063941	10	-	63471331	63491713	ENSRNOT00000063941	3	3399	ENSRNOG00000022239	Trarg1	5.85664	1.2595	2.50875	3.96729	0.469986	0.257289	0.443293	0.714722	0.261263	-2.84473	4.13984e-08
MSTRG.6609.2	13	+	34365147	34482754	MSTRG.6609.2	12	1425	ENSRNOG00000002376	Clasp1	0	0	0	0	7.3059	3.09006	0	5.12645	5.67353	12.469	4.3907e-08
MSTRG.9153.1	16	-	20135853	20150937	MSTRG.9153.1	28	3446	ENSRNOG00000033912	Fcho1	1.84085	1.87437	5.04918	1.02048	0.281507	0.529878	0.334992	0.326026	0.385422	-2.56668	5.08375e-08
ENSRNOT00000007485	4	-	170830851	170841187	ENSRNOT00000007485	3	2436	ENSRNOG00000005670	Art4	0.809581	0.930762	1.57547	0.540712	0.208711	0.249249	0.297757	0.177875	0.276146	-1.84541	5.60378e-08
ENSRNOT00000084543	4	-	78746547	78879294	ENSRNOT00000084543	15	2051	ENSRNOG00000009052	Igf2bp3	0.984314	0.987035	1.64844	0.472937	0.236471	0.280737	0.13338	0.224057	0.203663	-2.09948	6.9804e-08
MSTRG.4391.2	10	-	84780642	84789832	MSTRG.4391.2	13	2086	ENSRNOG00000048747	Cdk5rap3	2.26272	9.55001	7.54943	10.9382	1.07368	0.981554	0.292983	1.04969	0.996963	-2.9665	7.23102e-08
ENSRNOT00000039040	10	-	40392460	40419054	ENSRNOT00000039040	7	1436	ENSRNOG00000021370	Ccdc69	1.41154	1.40704	3.26056	1.09556	0.458022	0.425505	0.469614	0.49329	0.471759	-1.79649	8.47515e-08
ENSRNOT00000065753	7	+	145068290	145113507	ENSRNOT00000065753	30	4623	ENSRNOG00000036829	Nckap1l	0.767388	0.625773	1.31502	1.59881	0.26365	0.23473	0.321768	0.298994	0.37323	-1.6983	8.53438e-08
ENSRNOT00000015976	10	-	94497448	94500591	ENSRNOT00000015976	6	1208	ENSRNOG00000011917	Cd79b	23.0058	17.5231	60.6329	6.51516	0.962726	3.95863	1.09567	0.85895	1.58506	-3.84065	8.69011e-08
MSTRG.12844.1	2	-	196105569	196118871	MSTRG.12844.1	12	1663	ENSRNOG00000053812	LOC103689947	0	0	0.00378	0	311.802	0	423.944	0	0	17.2408	9.06819e-08
ENSRNOT00000024348	10	+	56610051	56619269	ENSRNOT00000024348	15	2785	ENSRNOG00000017915	Dvl2	0.116935	3.35614	1.63217	4.93959	0.087414	0.120114	0.149326	0.03665	0.040506	-4.70503	1.10914e-07
ENSRNOT00000077755	3	+	129462738	129463031	ENSRNOT00000077755	1	294	ENSRNOG00000055829	AABR07053830.1	0.839758	0.616137	0.372019	1.13759	0	0	0.063134	0.083675	0.006064	-4.16284	1.34162e-07
ENSRNOT00000004412	10	-	46153188	46172309	ENSRNOT00000004412	13	2963	ENSRNOG00000003302	Flcn	4.94647	5.54153	8.31833	2.29292	1.46411	1.1797	1.4069	1.04171	1.34606	-1.89293	1.37556e-07
ENSRNOT00000085487	15	+	48030973	48189951	ENSRNOT00000085487	40	5831	ENSRNOG00000013089	Kif13b	0.20359	2.05862	0.654604	0.627555	18.8119	2.01298	17.01	17.4332	18.3985	4.17253	1.68658e-07
ENSRNOT00000024658	3	+	114355798	114647382	ENSRNOT00000024658	17	2627	ENSRNOG00000028668	Slc28a2	0.269095	0.185165	0.034112	0.243642	0.749747	1.88794	3.29695	2.93066	0.986283	3.53815	1.68963e-07
ENSRNOT00000016848	15	-	108323179	108326907	ENSRNOT00000016848	2	1311	ENSRNOG00000012628	Gpr18	1.85216	1.01793	3.95071	0.725986	0.212806	0.284561	0.109205	0.167158	0.313783	-2.9562	1.72978e-07
MSTRG.4877.9	10	-	106771939	106776384	MSTRG.4877.9	5	766	ENSRNOG00000053469	AABR07030861.1	0	0	0	0	0	5.30709	3.4387	3.35262	4.20624	11.18	2.33316e-07
ENSRNOT00000067977	5	+	9279970	9315114	ENSRNOT00000067977	16	4974	ENSRNOG00000021669	Mybl1	2.63679	2.40863	5.18539	1.04329	0.549961	0.713765	0.528704	0.486797	0.466535	-2.21355	2.64409e-07
ENSRNOT00000083085	20	+	4118461	4125387	ENSRNOT00000083085	3	865	ENSRNOG00000030431	RT1-Db2	0.586688	0.042049	1.74003	0.154456	0	0	0	0	0	-8.84199	2.8851e-07
ENSRNOT00000036978	17	-	36061775	36177457	ENSRNOT00000036978	13	2853	ENSRNOG00000027125	Mboat1	0	0.006062	0	0	0	12.3951	10.5845	0.542244	6.30498	11.6641	3.05621e-07
ENSRNOT00000016543	16	-	22537056	22561496	ENSRNOT00000016543	10	3671	ENSRNOG00000012181	Lpl	56.0213	17.7451	20.5315	30.0491	6.18121	4.84186	7.64111	9.22617	4.76293	-2.11941	3.29358e-07
ENSRNOT00000088623	7	-	130135464	130151880	ENSRNOT00000088623	38	6350	ENSRNOG00000007133	Plxnb2	0.006819	0.020441	0.013548	0.006786	0.002992	31.165	0.007868	28.6482	0.002772	9.99476	3.54213e-07
ENSRNOT00000007117	7	+	11077411	11079687	ENSRNOT00000007117	1	2277	ENSRNOG00000005370	S1pr4	1.96023	1.66694	4.115	1.12751	0.405753	0.615233	0.352232	0.464715	0.586421	-2.04237	3.80007e-07
ENSRNOT00000087572	1	-	81964104	82004538	ENSRNOT00000087572	14	5457	ENSRNOG00000055650	Pou2f2	0.854776	0.523171	3.05108	0.424291	0.080631	0.194626	0.122339	0.08781	0.06483	-3.29935	4.54691e-07
ENSRNOT00000019698	9	-	71443588	71445739	ENSRNOT00000019698	1	2152	ENSRNOG00000014678	Fzd5	0.151812	0.106459	0.135679	0.005692	0.110303	20.4059	25.4712	0.097299	18.8561	7.12511	5.01477e-07
ENSRNOT00000002617	11	+	84745904	84785893	ENSRNOT00000002617	7	3632	ENSRNOG00000001908	Klhl6	7.62994	5.02918	14.5832	2.65175	0.875246	1.71851	1.27563	1.19096	1.29469	-2.40704	5.19174e-07
MSTRG.20004.6	6	-	135044843	135112775	MSTRG.20004.6	12	2890	ENSRNOG00000059714	Hsp90aa1	13.7243	8.01944	9.75434	0	0	0	0	0	0	-14.2545	6.64041e-07
ENSRNOT00000000172	18	-	40701984	40716686	ENSRNOT00000000172	5	1516	ENSRNOG00000000158	Cdo1	31.9449	5.49294	7.03958	11.9033	1.45723	1.17748	1.04722	2.96609	1.10207	-3.0545	7.03863e-07
ENSRNOT00000025826	1	+	213997709	214002815	ENSRNOT00000025826	9	2255	ENSRNOG00000047551	Pnpla2	0	0	0	1e-06	0	1e-06	14.0649	2.25271	0	10.286	7.25187e-07
ENSRNOT00000014163	10	-	87057136	87067456	ENSRNOT00000014163	3	1426	ENSRNOG00000010665	Ccr7	3.93383	3.57319	9.13396	2.51305	0.325698	1.36371	0.447011	0.37459	0.635402	-2.78004	7.85193e-07
ENSRNOT00000013378	3	+	21698032	21815379	ENSRNOT00000013378	26	5015	ENSRNOG00000009402	Rabgap1	10.603	0.026772	11.9872	9.9e-05	0.00057	0.046791	0.006212	0.001576	0.001912	-8.74789	8.78652e-07
ENSRNOT00000092906	9	+	65013862	65099433	ENSRNOT00000092906	35	4727	ENSRNOG00000062125	Aox3	1.18591	0.298152	0.355334	0.564149	0.046616	0.072627	0.039061	0.151328	0.035797	-2.9819	9.82689e-07
ENSRNOT00000029049	17	+	69634890	69647765	ENSRNOT00000029049	9	1219	ENSRNOG00000050040	Akr1c13	0.584915	0.597852	0.152473	0.155506	0.6478	126.427	0.569086	141.81	1.6091	7.26594	1.06876e-06
MSTRG.19519.3	6	-	76386976	76599548	MSTRG.19519.3	32	6440	ENSRNOG00000046256	Ralgapa1	0.663828	0.468334	0.768629	0.633632	6.53979	0.473978	7.57304	6.58593	5.26868	3.20593	1.40748e-06
ENSRNOT00000002492	11	-	81330845	81344488	ENSRNOT00000002492	3	1487	ENSRNOG00000001821	Adipoq	95.5659	19.5172	23.6451	39.1467	4.43952	1.96066	3.8682	9.09208	1.6488	-3.27457	1.41626e-06
ENSRNOT00000043533	3	+	28416954	28566928	ENSRNOT00000043533	14	1804	ENSRNOG00000029993	Kynu	1.71771	1.08832	3.99619	0.200119	0.060944	0.177836	0.106625	0.032028	0.143256	-3.89313	1.42557e-06
ENSRNOT00000087287	2	+	235311727	235327952	ENSRNOT00000087287	4	1501	ENSRNOG00000057470	Pla2g12a	4.15335	4.93386	3.33062	3.67476	5.58996	8.22306	10.6399	8.45626	6.98997	1.11194	1.66928e-06
ENSRNOT00000090122	4	-	176638629	176679815	ENSRNOT00000090122	17	2587	ENSRNOG00000059753	Gys2	1.86844	0.209539	0.489015	0.40362	0.009807	0	0.027765	0.022822	0	-5.79717	1.67368e-06
ENSRNOT00000072920	5	-	79664765	79691258	ENSRNOT00000072920	4	4010	ENSRNOG00000048321	Tnfsf8	0.502598	0.391489	2.27688	0.309609	0.071366	0.15346	0.069746	0.079421	0.056724	-3.17031	1.7314e-06
MSTRG.19964.3	6	+	132539514	132590241	MSTRG.19964.3	14	1800	ENSRNOG00000014476	Evl	8.47997	7.13615	22.8674	4.24541	0.834835	2.44476	1.66052	1.87387	1.45916	-2.54057	1.77824e-06
MSTRG.12462.3	2	-	149535484	149564103	MSTRG.12462.3	8	8193	ENSRNOG00000013917	Igsf10	2.6033	0	2.09029	1.95552	0	0	0	0	0	-13.491	1.8566e-06
ENSRNOT00000017302	1	-	53065025	53087474	ENSRNOT00000017302	2	1424	ENSRNOG00000012964	Ccr6	1.49436	2.77961	8.39407	0.76624	0.31918	0.486898	0.203794	0.338382	0.300183	-3.18842	1.92324e-06
ENSRNOT00000082885	6	+	30638733	30639143	ENSRNOT00000082885	1	411	ENSRNOG00000060896	AABR07063424.1	0.108029	0.091175	0.096408	0.103892	0.103806	0.1053	122.239	0.097421	21.1032	8.12749	2.00804e-06
ENSRNOT00000085073	7	+	59200918	59325922	ENSRNOT00000085073	13	2875	ENSRNOG00000004483	Ptprr	0	0	0	0	4.55938	4.33094	7.28697	0	0.006234	13.0796	2.21768e-06
ENSRNOT00000035040	5	-	58985829	58987760	ENSRNOT00000035040	5	1509	ENSRNOG00000021546	Sit1	1.80366	2.2831	4.81958	1.1499	0.299489	0.660578	0.581304	0.533755	0.546846	-2.11028	2.21798e-06
ENSRNOT00000093342	2	+	186703541	186724205	ENSRNOT00000093342	10	1553	ENSRNOG00000034230	Fcrl1	3.1307	1.05568	7.07349	0.885497	0.062296	0.254169	0.109747	0.002356	0.105139	-4.65316	2.29026e-06
ENSRNOT00000066848	8	+	55603968	55631446	ENSRNOT00000066848	5	2527	ENSRNOG00000011500	Pou2af1	10.1239	8.62734	25.1458	3.83555	1.07154	3.00363	1.12901	1.77372	1.23749	-2.71366	2.47499e-06
ENSRNOT00000082388	1	+	219764001	219859844	ENSRNOT00000082388	20	3940	ENSRNOG00000019372	Pc	0.635222	0.130438	0.024408	0.03593	19.5555	1.54052	1.96078	12.8504	2.49744	5.33535	2.47788e-06
ENSRNOT00000010556	4	-	151414684	151428894	ENSRNOT00000010556	7	1445	ENSRNOG00000007990	Adipor2	0.120367	0.093414	0.179693	0.151223	2.86828	0.105929	15.0106	0.165392	18.5231	5.88469	2.57562e-06
ENSRNOT00000071926	4	+	56337695	56351818	ENSRNOT00000071926	3	3290	ENSRNOG00000045797	Lep	2.97907	1.00199	1.0273	1.1631	0.223089	0.036508	0.066532	0.26116	0.04064	-3.48181	2.58216e-06
ENSRNOT00000039518	15	+	57065428	57102599	ENSRNOT00000039518	14	2500	ENSRNOG00000022760	Rubcnl	2.84015	2.19972	6.0205	1.23686	0.370101	0.825673	0.695744	0.388673	0.526098	-2.30538	2.64937e-06
ENSRNOT00000015205	1	+	91433030	91448564	ENSRNOT00000015205	11	1877	ENSRNOG00000010938	Slc7a10	2.36652	0.484166	0.395443	0.629874	0.02457	0.107899	0.062002	0.004845	0.069126	-4.00539	2.73833e-06
ENSRNOT00000021055	1	-	256806472	256813711	ENSRNOT00000021055	6	941	ENSRNOG00000015518	Rbp4	39.9063	7.9658	10.757	12.7532	2.5488	2.57727	2.87875	4.4193	2.07569	-2.49126	2.79603e-06
ENSRNOT00000089411	20	+	5184515	5186503	ENSRNOT00000089411	3	1311	ENSRNOG00000058566	Ltb	5.06815	5.29517	8.5387	2.13297	1.43133	1.59559	1.19077	1.52079	1.41153	-1.73668	2.95607e-06
ENSRNOT00000013210	15	-	62067565	62097749	ENSRNOT00000013210	5	957	ENSRNOG00000009559	LOC103689974	0.979451	0.570572	2.02741	0.521015	0.165247	0.266671	0.218422	0.238023	0.167773	-2.11542	3.19256e-06
ENSRNOT00000037901	18	+	52215682	52366238	ENSRNOT00000037901	25	7613	ENSRNOG00000013674	Megf10	0.777492	0.474693	1.1993	0.278468	0.107126	0.206056	0.120744	0.178521	0.120813	-2.07124	3.48383e-06
ENSRNOT00000029237	1	-	219431997	219438779	ENSRNOT00000029237	10	1723	ENSRNOG00000021510	Tbc1d10c	7.1298	5.34643	15.3473	3.87172	1.39505	2.45203	1.95333	1.57183	1.92461	-1.9414	3.69791e-06
ENSRNOT00000027254	1	+	81763614	81767980	ENSRNOT00000027254	5	1013	ENSRNOG00000020125	AABR07002700.1	8.79637	6.43321	27.993	3.3969	0.534203	2.46092	0.75889	0.870908	1.0058	-3.21618	3.80054e-06
ENSRNOT00000013694	2	+	236233239	236345056	ENSRNOT00000013694	12	2578	ENSRNOG00000010121	Lef1	0.69233	0.817213	2.32326	0.642008	0.269632	0.264972	0.26066	0.2066	0.125713	-2.15173	4.0388e-06
ENSRNOT00000022571	2	+	208577388	208586356	ENSRNOT00000022571	10	1047	ENSRNOG00000016394	LOC100911453	1.16499	0.866541	0.61713	0.070537	0.02166	0.048782	0.010299	0	0.04108	-4.59416	4.11552e-06
ENSRNOT00000087517	5	+	70441123	70511659	ENSRNOT00000087517	14	1863	ENSRNOG00000059876	Fsd1l	0.002873	0	0.009777	0.011204	0.001997	2.45047	0.092642	0.162591	1.29447	7.10032	4.20222e-06
ENSRNOT00000078421	10	-	1308864	1461269	ENSRNOT00000078421	24	2935	ENSRNOG00000002912	Parn	0.500182	0.835701	1.06805	0.839496	2.91105	1.95712	2.14175	3.80705	1.26065	1.71341	4.46225e-06
ENSRNOT00000073321	10	-	109987735	110005901	ENSRNOT00000073321	43	9139	ENSRNOG00000045636	Fasn	106.497	29.1669	68.7231	108.241	22.3702	18.4047	24.9174	18.2261	20.5607	-1.75874	4.68804e-06
ENSRNOT00000039677	1	-	217644259	217720221	ENSRNOT00000039677	26	4789	ENSRNOG00000020857	Ppfia1	2.48268	0.846869	0	3.06782	0	0	0	0	0	-12.6832	5.03862e-06
ENSRNOT00000004279	13	+	89524329	89530068	ENSRNOT00000004279	6	1864	ENSRNOG00000003171	Mpz	0.861772	1.02952	1.86379	0.343628	0.068053	0.190675	0.013062	0.096234	0.119273	-3.25158	6.43507e-06
ENSRNOT00000001712	12	-	39822637	39850567	ENSRNOT00000001712	7	1186	ENSRNOG00000001270	Hvcn1	10.739	7.94243	29.744	4.96016	1.50047	3.2488	1.71978	1.12772	2.38123	-2.58522	6.45831e-06
ENSRNOT00000050367	14	-	77236278	77263729	ENSRNOT00000050367	6	1827	ENSRNOG00000028423	Otop1	1.05782	0.035145	0.147478	0.175531	0.009599	0	0	0	0	-7.32783	7.58693e-06
ENSRNOT00000029607	1	+	219403970	219406128	ENSRNOT00000029607	2	835	ENSRNOG00000021724	Ptprcap	26.4776	21.689	57.8818	9.4262	2.08229	8.02029	3.67314	2.76893	4.43579	-2.63659	7.75888e-06
ENSRNOT00000084447	10	-	1308414	1461250	ENSRNOT00000084447	24	3366	ENSRNOG00000002912	Parn	0.249655	0.368773	1.11217	0.968221	0.010352	0.044428	0.055403	0.1397	0.074529	-3.20457	7.89875e-06
ENSRNOT00000028433	1	-	227429596	227441442	ENSRNOT00000028433	7	1232	ENSRNOG00000020945	Ms4a1	29.2688	17.257	64.3851	5.43135	0.203626	3.78199	0.56918	0.287163	1.52608	-4.36493	8.0449e-06
MSTRG.13642.55	20	-	4789000	4921350	MSTRG.13642.55	9	1558	ENSRNOG00000039744	RT1-CE4	11.1551	11.9837	0.942951	0	0	0	0	0	0	-13.0071	8.47568e-06
MSTRG.6246.2	12	+	36871779	37033695	MSTRG.6246.2	50	8985	ENSRNOG00000001004	Ncor2	0	0	0	0	0	0.035462	1.15703	0.238286	0.036324	11.2525	8.64237e-06
ENSRNOT00000085987	20	+	44521279	44630294	ENSRNOT00000085987	11	2936	ENSRNOG00000000596	Fyn	0	2.00684	4.13503	1.44509	0	0	0	0	0	-12.2005	9.07887e-06
ENSRNOT00000059167	4	+	78354335	78358503	ENSRNOT00000059167	2	1269	ENSRNOG00000038740	Gimap7	10.9105	9.33459	18.2455	5.86796	1.914	3.80078	3.09422	3.93746	1.7768	-1.79355	9.17882e-06
ENSRNOT00000010224	7	+	114997103	115002902	ENSRNOT00000010224	5	1327	ENSRNOG00000007628	Ptp4a3	0.000694	0.000115	0.001345	0.008718	0.003958	0.001563	4.94784	0.000221	5.01078	8.48991	9.26985e-06
ENSRNOT00000003425	14	-	43961756	43992587	ENSRNOT00000003425	3	1492	ENSRNOG00000002540	Rhoh	10.3654	7.52071	25.522	3.47647	0.907514	3.15625	1.09769	0.978693	1.3281	-2.82223	9.47638e-06
ENSRNOT00000023149	17	+	31236015	31403685	ENSRNOT00000023149	11	6657	ENSRNOG00000017210	Slc22a23	1.4926	6.99218	4.69342	6.60306	0.375476	0.00406	0.243343	0.073906	0.009728	-4.98312	9.58046e-06
ENSRNOT00000040901	8	-	39762035	39830306	ENSRNOT00000040901	13	2510	ENSRNOG00000032180	Ccdc15	1.25852	1.3041	2.37274	1.54561	0.579911	0.876659	0.538025	0.420345	0.653083	-1.25423	9.64612e-06
ENSRNOT00000015767	7	+	125034764	125055976	ENSRNOT00000015767	9	3215	ENSRNOG00000022268	Pnpla3	17.1844	2.8296	5.89535	4.73809	1.39468	1.52355	1.47454	1.56715	0.948629	-2.3386	9.92719e-06
ENSRNOT00000042571	20	+	4106189	4124780	ENSRNOT00000042571	5	864	ENSRNOG00000030431	RT1-Db2	1.03516	0.558826	2.43243	0.467046	0.048751	0.216821	0.007421	0.099366	0.047346	-3.51257	9.94938e-06
ENSRNOT00000015021	15	-	46555188	46593653	ENSRNOT00000015021	13	2737	ENSRNOG00000010798	Blk	2.00341	1.91564	5.83284	0.883085	0.041496	0.37348	0.186252	0.165795	0.442648	-3.30155	1.04044e-05
ENSRNOT00000039383	14	-	15253125	15258207	ENSRNOT00000039383	4	1138	ENSRNOG00000024899	Cxcl13	18.942	10.3051	54.335	5.73651	1.23795	3.0716	2.93811	3.05197	3.42625	-2.86445	1.14301e-05
ENSRNOT00000007465	7	+	34744483	34759206	ENSRNOT00000007465	6	2303	ENSRNOG00000005637	Usp44	0.563488	0.417867	1.00599	0.254863	0.057721	0.087249	0.115544	0.198035	0.067734	-2.25984	1.28411e-05
ENSRNOT00000011727	8	+	5606592	5616493	ENSRNOT00000011727	10	1790	ENSRNOG00000030187	Mmp12	1.6871	2.08247	4.77347	0.535396	0.112158	0.508859	0.292225	0.188661	0.310944	-2.8596	1.3396e-05
ENSRNOT00000000149	17	-	28104589	28191436	ENSRNOT00000000149	6	1091	ENSRNOG00000000137	Ly86	5.62826	4.14895	9.22747	2.66678	1.01849	2.11833	1.68687	1.39296	1.15086	-1.735	1.3401e-05
MSTRG.21269.1	7	+	121791084	121864679	MSTRG.21269.1	14	1357	ENSRNOG00000018316	Grap2	1.2966	1.21019	2.65381	0.953185	0.396547	0.420315	0.304857	0.686185	0.412786	-1.63294	1.4976e-05
ENSRNOT00000037134	7	+	121109241	121128542	ENSRNOT00000037134	8	1961	ENSRNOG00000016852	Apobec3b	2.01599	1.79017	4.30348	1.16703	0.40037	0.9026	0.51933	0.628466	0.482468	-1.8372	1.54459e-05
ENSRNOT00000075799	4	+	154423209	154472924	ENSRNOT00000075799	36	4419	ENSRNOG00000045772	A2m	1.34672	1.33505	2.80439	0.480567	0.238389	0.504159	0.217532	0.251349	0.20931	-2.24799	1.58821e-05
ENSRNOT00000022319	2	-	57860834	57935334	ENSRNOT00000022319	10	3953	ENSRNOG00000016163	Slc1a3	1.093	0.489433	1.25642	0.827872	0.081294	0.274318	0.092017	0.313938	0.118159	-2.2393	1.60556e-05
ENSRNOT00000014180	2	-	88126667	88135410	ENSRNOT00000014180	7	1586	ENSRNOG00000010079	Car3	252.691	61.5252	65.4578	132.23	9.90291	6.55996	11.329	36.9291	5.66844	-3.0581	1.61094e-05
ENSRNOT00000038822	13	+	47602692	47617064	ENSRNOT00000038822	8	1652	ENSRNOG00000004441	Fcmr	9.05071	5.61605	22.3496	3.27231	0.863797	2.52581	1.60139	1.66039	1.38451	-2.49598	1.63836e-05
ENSRNOT00000032394	1	-	88169378	88176610	ENSRNOT00000032394	3	942	ENSRNOG00000049868	LOC100909725	0.340811	0.52536	0.557247	0.745224	3.35079	1.45995	0.977543	1.39544	1.65213	1.84298	1.64767e-05
ENSRNOT00000078058	1	-	169491920	169513537	ENSRNOT00000078058	8	2753	ENSRNOG00000031202	Trim30c	0.4587	0.260136	2.51127	0.370035	0.080643	0.124204	0.090905	0.079004	0.126618	-2.97681	1.65226e-05
MSTRG.1888.2	1	-	198123884	198128984	MSTRG.1888.2	11	1747	ENSRNOG00000019430	Coro1a	0.976256	14.7191	29.6506	2.45426	0.383371	1.53038	0.304641	0.304539	0.595889	-4.1111	1.85093e-05
MSTRG.13293.2	2	-	241273763	241545392	MSTRG.13293.2	17	3269	ENSRNOG00000032247	Bank1	0.705223	0.48163	1.18964	0.215209	0.030053	0.034525	0.096873	0.025782	0.155418	-3.06878	1.87735e-05
ENSRNOT00000003515	10	+	47930633	47949773	ENSRNOT00000003515	5	1535	ENSRNOG00000002599	Grap	7.12747	5.13018	16.583	2.80537	0.795304	2.4784	1.28298	1.0525	1.07343	-2.41731	1.90207e-05
ENSRNOT00000022579	5	+	157222636	157228791	ENSRNOT00000022579	4	1885	ENSRNOG00000016826	Pla2g2d	7.44411	4.91585	11.8885	1.21527	0.833966	0.879887	0.192203	0.637421	1.12592	-2.965	1.90268e-05
ENSRNOT00000082393	13	+	90184569	90219217	ENSRNOT00000082393	7	2754	ENSRNOG00000059073	Slamf1	1.24935	1.01608	3.16118	0.419091	0.165665	0.334133	0.195741	0.204558	0.326383	-2.41833	1.90671e-05
ENSRNOT00000021981	18	+	750776	752616	ENSRNOT00000021981	2	1665	ENSRNOG00000016417	Zfp136	1.19132	1.21573	1.40256	0.930165	0.527748	0.537143	0.768274	0.456112	0.376956	-1.01709	1.96526e-05
MSTRG.4872.8	10	+	106329227	106332021	MSTRG.4872.8	5	857	ENSRNOG00000002807	Sept9	2.85209	2.53269	3.43381	0.30873	0.075577	0.329199	0.394121	0.084138	0.077587	-3.42549	2.008e-05
MSTRG.3677.1	10	+	46940795	46955434	MSTRG.3677.1	23	4365	ENSRNOG00000003948	Llgl1	1.06911	0.73829	0.392448	2.64866	0.197442	0.047828	0.118284	0.01454	0.134063	-3.41035	2.13765e-05
ENSRNOT00000041970	19	+	37652969	37668019	ENSRNOT00000041970	38	6977	ENSRNOG00000024452	Carmil2	0.823098	0.505824	2.39968	0.530178	0.135058	0.310031	0.174823	0.142207	0.209971	-2.29396	2.2333e-05
ENSRNOT00000009693	6	-	105459882	105518725	ENSRNOT00000009693	12	3508	ENSRNOG00000007271	Map3k9	0.002751	0.006553	0.011252	0.008951	0.003301	0.008419	1.01225	1.88907	0.050264	6.27052	2.45422e-05
ENSRNOT00000009897	5	-	116996652	117038882	ENSRNOT00000009897	8	1422	ENSRNOG00000007527	Tm2d1	0.219486	0.152161	0.572114	0.403311	1.91681	2.35634	2.64674	7.45721	0.350369	3.2692	2.48151e-05
ENSRNOT00000056608	10	-	57415832	57436368	ENSRNOT00000056608	5	1152	ENSRNOG00000037409	Scimp	1.15806	0.900232	1.59553	0.562169	0.421186	0.411945	0.378751	0.363491	0.25431	-1.38138	2.54459e-05
ENSRNOT00000078190	6	-	96153014	96171779	ENSRNOT00000078190	6	1888	ENSRNOG00000007785	Trmt5	0	0	0	0	0.08299	1.10258	0	0.094838	2.03511	10.1976	2.5479e-05
ENSRNOT00000039809	X	-	123217326	123254557	ENSRNOT00000039809	7	5166	ENSRNOG00000009746	Akap17b	1.55471	1.22187	2.91986	0.951809	0.530241	0.642241	0.508677	0.610169	0.582776	-1.38324	2.6562e-05
MSTRG.17325.2	4	-	170154165	170167798	MSTRG.17325.2	12	2759	ENSRNOG00000005505	Wbp11l1	0.002161	0.002199	0.10821	0.0012	1.22463	3.88782	1.44756	2.7741	0.005207	6.17672	2.80138e-05
ENSRNOT00000027770	10	+	89181253	89198176	ENSRNOT00000027770	19	4043	ENSRNOG00000020441	Wnk4	0.024892	0.029334	3.02941	5.20688	0.081893	0.03627	0.049098	0.026513	0.036379	-5.29232	2.83557e-05
ENSRNOT00000092021	14	-	86781202	86796378	ENSRNOT00000092021	22	3336	ENSRNOG00000059140	Myo1g	5.87974	4.30187	14.1611	3.14715	1.40633	2.20242	1.25123	1.81432	1.54272	-1.91197	2.85309e-05
ENSRNOT00000061027	20	-	4638720	4792283	ENSRNOT00000061027	8	1146	ENSRNOG00000050183	RT1-CE1	3.63261	2.0112	2.13541	0	0	0	0	0	0	-10.9061	2.92508e-05
ENSRNOT00000068386	18	-	28529576	28535828	ENSRNOT00000068386	8	2040	ENSRNOG00000042137	Tmem173	3.58085	2.30292	6.82924	3.03665	1.23819	1.70824	1.42032	1.4344	1.09503	-1.36438	2.93018e-05
MSTRG.24206.1	X	-	34192675	34303724	MSTRG.24206.1	3	1351	ENSRNOG00000030228	LOC688932	0	0	0.001477	0	0.001252	11.0769	6.93314	0	0.008467	11.5798	2.94912e-05
ENSRNOT00000041091	8	+	22559098	22576154	ENSRNOT00000041091	7	1301	ENSRNOG00000033256	LOC691141	0.878428	0.689531	2.14705	0.617891	0.15786	0.304333	0.348349	0.168648	0.286106	-1.94007	2.96184e-05
ENSRNOT00000027837	1	+	87938042	87959569	ENSRNOT00000027837	32	2800	ENSRNOG00000020505	Map4k1	5.70843	4.85301	15.9692	2.79273	1.33166	2.27552	1.30032	1.13264	1.38684	-2.14966	2.96248e-05
ENSRNOT00000003941	19	+	25803262	25813467	ENSRNOT00000003941	17	2080	ENSRNOG00000002914	Trmt1	0.322477	0.181778	0.39452	0.322172	0.323559	0.377259	6.37242	7.10808	5.74711	3.84239	2.96761e-05
ENSRNOT00000009564	3	+	122803772	122808558	ENSRNOT00000009564	12	1906	ENSRNOG00000007128	Nop56	6.2e-05	0.000102	0.049449	0.000215	0.002794	13.441	15.104	7e-05	5.9e-05	8.72764	3.12824e-05
ENSRNOT00000023763	18	-	63415306	63488027	ENSRNOT00000023763	10	1450	ENSRNOG00000017453	Ptpn2	0.711293	5.0013	2.89321	0	0	0	0	0	0	-11.4022	3.13726e-05
ENSRNOT00000018898	10	-	66856980	66858598	ENSRNOT00000018898	1	1619	ENSRNOG00000014125	Evi2b	2.1013	1.82037	4.21826	1.70746	0.792796	1.13292	0.881591	1.00364	0.822337	-1.26169	3.14239e-05
ENSRNOT00000093404	20	+	14095914	14096072	ENSRNOT00000093404	1	159	ENSRNOG00000049952	Gucd1	1.3722	1.60187	2.82801	5.81028	14.9262	15.5462	4.45324	13.3351	16.4855	2.3008	3.153e-05
ENSRNOT00000013854	2	+	44787002	44837831	ENSRNOT00000013854	27	4535	ENSRNOG00000010369	Dhx29	2.8e-05	0.002951	0.036415	4.5e-05	5.25162	0.000125	0.029957	0.00605	5.84842	7.85935	3.45696e-05
ENSRNOT00000086431	18	+	44716226	44779903	ENSRNOT00000086431	2	1871	ENSRNOG00000026136	Tnfaip8	2.6255	2.56956	9.45543	1.57686	0.313155	1.07686	0.272148	0.164208	0.525689	-2.95051	3.49536e-05
ENSRNOT00000036189	10	+	11810926	11842482	ENSRNOT00000036189	19	3307	ENSRNOG00000024210	Nlrc3	1.77035	1.19406	3.7542	0.891379	0.298893	0.560348	0.391997	0.532555	0.552479	-1.8738	3.50673e-05
ENSRNOT00000022095	15	+	42653148	42665857	ENSRNOT00000022095	9	1644	ENSRNOG00000016460	Clu	88.8768	74.8131	178.684	37.6349	20.2717	34.6817	22.2271	23.7524	22.796	-1.79534	3.52467e-05
ENSRNOT00000091197	12	+	2201891	2204249	ENSRNOT00000091197	4	1220	ENSRNOG00000001001	Retn	18.4222	2.8147	2.54744	5.98388	0.342393	0.385153	0.439001	1.74576	0.206767	-3.45223	3.53886e-05
ENSRNOT00000004403	13	+	83996080	84071400	ENSRNOT00000004403	8	1707	ENSRNOG00000003298	Cd247	3.14665	2.08789	5.8501	1.36016	0.647509	1.01699	0.637496	1.01185	0.543468	-1.86329	3.55306e-05
ENSRNOT00000025309	1	-	191951581	191984858	ENSRNOT00000025309	17	2809	ENSRNOG00000018599	Gga2	20.1939	18.112	42.3814	9.49964	6.5109	7.38968	5.85442	6.42772	6.16824	-1.65332	3.58319e-05
MSTRG.18435.5	5	-	141039587	141242131	MSTRG.18435.5	98	23614	ENSRNOG00000016047	Macf1	3.8349	3.03408	12.6384	6.10919	1.31932	1.85081	0.475903	1.48584	0.689829	-2.30382	3.75072e-05
ENSRNOT00000015029	7	-	12634216	12635943	ENSRNOT00000015029	5	840	ENSRNOG00000033564	Cfd	167.676	40.6604	35.1653	95.1517	10.4899	9.76739	9.7938	29.0072	9.32584	-2.50226	3.88702e-05
MSTRG.21542.1	7	-	140981772	141001993	MSTRG.21542.1	25	3890	ENSRNOG00000056297	Fmnl3	4.62565	3.35893	7.51126	2.63404	1.6845	2.06868	1.36299	1.12755	1.36843	-1.42755	3.89371e-05
ENSRNOT00000049884	3	+	28627084	29236219	ENSRNOT00000049884	14	1660	ENSRNOG00000031168	Arhgap15	5.72534	4.03289	17.4432	4.31318	1.4716	2.55763	1.43412	1.51407	1.73667	-2.01802	3.9824e-05
MSTRG.13339.1	2	-	248608307	248609872	MSTRG.13339.1	2	320	MSTRG.13339	.	0.444099	0.981214	1.20189	2.1246	0	0.149534	0.260853	0.071059	0.058032	-3.27193	4.1382e-05
ENSRNOT00000082427	10	-	85941176	85948080	ENSRNOT00000082427	6	1448	ENSRNOG00000036880	Arl5c	2.55589	1.67305	5.46725	1.10555	0.31164	0.777243	0.358498	0.483614	0.746951	-2.17463	4.1852e-05
MSTRG.4181.6	10	+	71546977	71721890	MSTRG.4181.6	47	8208	ENSRNOG00000034013	Acaca	26.3505	9.85875	16.8543	20.3281	7.04952	7.38937	8.70892	7.65168	7.28708	-1.12919	4.24068e-05
ENSRNOT00000026955	1	+	198259496	198265839	ENSRNOT00000026955	5	1704	ENSRNOG00000019914	Fam57b	1.12171	0.094122	0.564969	0.388186	0.057172	0.043068	0.114311	0.081939	0.074741	-2.69261	4.30831e-05
ENSRNOT00000024917	19	-	57321640	57333433	ENSRNOT00000024917	5	1933	ENSRNOG00000018445	Agt	11.509	2.07583	3.01763	5.8793	0.857575	0.772563	1.44242	1.48664	0.598823	-2.31304	4.32232e-05
ENSRNOT00000013851	1	+	157646173	157660008	ENSRNOT00000013851	3	1295	ENSRNOG00000010224	Rab30	2.11858	0.944468	4.10783	1.96044	0.4914	0.522617	0.60021	0.921594	0.563761	-1.71992	4.34846e-05
ENSRNOT00000008365	3	-	171276062	171286413	ENSRNOT00000008365	8	1692	ENSRNOG00000006314	Zbp1	1.07848	0.58943	1.1834	0.623609	0.345334	0.289905	0.248636	0.231987	0.445463	-1.32221	4.37518e-05
ENSRNOT00000074915	9	-	101307764	101319845	ENSRNOT00000074915	5	864	ENSRNOG00000049797	NEWGENE_1311658	0.458503	0.451151	1.12117	0.173609	0.040231	0.124983	0.078092	0.053224	0.141293	-2.45798	4.38217e-05
ENSRNOT00000005143	13	-	45314933	45318878	ENSRNOT00000005143	2	1749	ENSRNOG00000003866	Cxcr4	19.3364	15.6642	36.7985	7.42571	5.4217	6.39495	4.13099	5.16409	5.31738	-1.75802	4.41715e-05
ENSRNOT00000089988	11	-	81330293	81334120	ENSRNOT00000089988	3	1876	ENSRNOG00000001821	Adipoq	0.833363	0.188618	0.443428	1.64467	0.080006	0.042946	0.190378	0.089443	0.028905	-3.0132	4.48243e-05
ENSRNOT00000032997	17	+	15814132	15830328	ENSRNOT00000032997	5	1279	ENSRNOG00000016525	Susd3	4.0396	3.25042	6.14763	1.62003	1.37113	1.33256	0.871385	1.00735	1.19501	-1.55667	4.62515e-05
MSTRG.13747.3	20	+	6973398	7035607	MSTRG.13747.3	17	2792	ENSRNOG00000000528	Fgd2	1.26473	3.0906	5.13489	2.42203	0.330896	0.989058	0.593672	0.97922	0.589024	-1.9536	4.71417e-05
MSTRG.13501.33	20	-	2878047	2944047	MSTRG.13501.33	5	920	ENSRNOG00000000446	LOC100911983	1.97869	0.02196	1.46221	0.018403	0.005734	0.004825	0.01386	0.006336	0.044962	-5.39872	4.81929e-05
ENSRNOT00000061469	3	-	146484238	146491837	ENSRNOT00000061469	5	2814	ENSRNOG00000042220	Vsx1	0.245007	0.202863	1.0595	0.08071	0.030874	0.072414	0.035426	0.021312	0.051817	-3.02975	4.86218e-05
ENSRNOT00000013105	3	+	176102351	176124306	ENSRNOT00000013105	32	2040	ENSRNOG00000009531	Col9a3	0.954062	0.72053	1.77419	0.401609	0.239617	0.238295	0.329172	0.163379	0.273486	-1.79528	4.89086e-05
ENSRNOT00000056037	7	-	123453788	123456268	ENSRNOT00000056037	3	1743	ENSRNOG00000007664	Tnfrsf13c	6.55547	5.2139	22.0749	1.35811	0.304016	1.77563	0.167118	0.393168	0.570768	-3.62199	5.03602e-05
MSTRG.18548.1	5	-	147750973	147779624	MSTRG.18548.1	13	2092	ENSRNOG00000009705	Lck	7.23522	6.43005	15.1104	4.2122	1.89388	3.44548	2.51502	1.89435	2.48459	-1.60642	5.08402e-05
ENSRNOT00000007044	14	-	100151509	100184192	ENSRNOT00000007044	10	1657	ENSRNOG00000005214	Plek	8.57776	5.32308	18.4327	2.70767	1.36068	2.41797	1.50971	1.8681	1.83392	-2.13235	5.08789e-05
ENSRNOT00000026316	1	+	219759183	219859848	ENSRNOT00000026316	20	3971	ENSRNOG00000019372	Pc	0.007178	0	0.349594	0.003515	1.01136	5.56535	6.86412	5.56257	6.33632	5.98996	5.1501e-05
ENSRNOT00000084773	6	+	25074955	25100977	ENSRNOT00000084773	8	2423	ENSRNOG00000007744	Ehd3	0.546205	0.358528	1.06641	0.065506	0.079024	0.062459	0.05419	0.084094	0.07053	-2.6855	5.23411e-05
ENSRNOT00000009392	4	+	99185885	99202023	ENSRNOT00000009392	6	1469	ENSRNOG00000007129	Cd8b	0.627392	0.598998	1.39283	0.288673	0.100284	0.147514	0.063561	0.101158	0.256723	-2.2741	5.34821e-05
ENSRNOT00000001743	20	-	13130636	13142856	ENSRNOT00000001743	3	1484	ENSRNOG00000001295	S100b	8.94065	5.22149	5.23478	5.16183	1.79831	2.85755	2.55794	3.45415	1.91835	-1.15756	5.38707e-05
ENSRNOT00000017109	1	+	229642412	229674134	ENSRNOT00000017109	9	1732	ENSRNOG00000012611	Lpxn	15.2008	12.4112	31.6791	6.3133	3.21447	4.84228	4.18658	5.32008	3.84865	-1.79054	5.44317e-05
ENSRNOT00000021488	8	+	49282460	49287110	ENSRNOT00000021488	5	721	ENSRNOG00000015994	Cd3d	3.27849	3.42579	9.41836	3.04109	0.615314	1.66957	0.894121	1.35097	1.40022	-1.86075	5.51421e-05
ENSRNOT00000006549	3	-	38682146	38741113	ENSRNOT00000006549	26	3564	ENSRNOG00000004864	Prpf40a	4.4668	4.63933	4.5537	5.11528	13.4555	14.4874	4.30637	13.3125	17.697	1.56856	5.6937e-05
ENSRNOT00000007077	3	-	92288818	92290919	ENSRNOT00000007077	1	2102	ENSRNOG00000005347	Fjx1	1.12225	1.72828	0.884088	1.03201	1.80537	2.45637	2.16528	2.70545	2.04115	1.02642	5.82539e-05
MSTRG.2269.1	1	+	219759159	219859844	MSTRG.2269.1	21	4028	ENSRNOG00000019372	Pc	43.8416	30.6133	18.4689	28.9542	4.42381	6.38879	7.52465	4.70035	15.0545	-1.86838	5.84385e-05
ENSRNOT00000040856	2	-	248451547	248484100	ENSRNOT00000040856	12	1899	ENSRNOG00000036885	Gbp3	1.05006	1.12043	1.53957	1.8595	0.148506	0.502478	0.391579	0.56653	0.178406	-1.82404	5.99992e-05
ENSRNOT00000066722	7	-	14403592	14418950	ENSRNOT00000066722	18	3968	ENSRNOG00000006167	Rasal3	1.62393	0.67562	2.25361	1.10054	0.287239	0.388223	0.204371	0.054005	0.063557	-2.67561	6.20798e-05
ENSRNOT00000003268	10	+	47765783	47768483	ENSRNOT00000003268	5	1469	ENSRNOG00000002382	Mfap4	4.69665	12.3635	10.5054	12.2484	3.13517	3.98962	3.85921	4.69719	3.06116	-1.27546	6.26628e-05
ENSRNOT00000038780	7	+	28412198	28486609	ENSRNOT00000038780	4	1827	ENSRNOG00000004517	Igf1	1.98286	0.704749	1.20145	0.747883	2.57178	2.38927	3.80369	3.52768	2.40118	1.47593	6.34271e-05
ENSRNOT00000033327	6	-	42471066	42473738	ENSRNOT00000033327	1	2673	ENSRNOG00000024310	Kcnf1	1.24116	1.37626	0.708037	0.787632	1.97388	1.71017	1.78341	2.38387	2.16463	1.08487	6.53827e-05
ENSRNOT00000038408	1	-	165884407	165891627	ENSRNOT00000038408	10	2732	ENSRNOG00000025075	Relt	1.31588	1.15674	2.71557	0.480361	0.386409	0.282077	0.433826	0.361791	0.222328	-1.92024	6.67964e-05
ENSRNOT00000058111	14	-	81435449	81472952	ENSRNOT00000058111	13	2859	ENSRNOG00000013747	Sh3bp2	1.10669	1.37635	0.022761	0.038979	0.013728	0.004647	0.035367	0.002302	0	-5.6065	6.7651e-05
ENSRNOT00000082164	1	-	141458181	141471010	ENSRNOT00000082164	9	2920	ENSRNOG00000015086	Plin1	3.63387	0.42412	1.54342	3.31426	0.440371	0.092322	0.325061	0.35088	0.086536	-2.95702	7.00399e-05
ENSRNOT00000050092	11	-	60525934	60546997	ENSRNOT00000050092	6	927	ENSRNOG00000030246	Btla	1.4026	1.45332	5.95391	0.518941	0.124717	0.477764	0.287943	0.169272	0.356859	-2.86824	7.19741e-05
ENSRNOT00000026333	15	+	34270648	34282495	ENSRNOT00000026333	21	3579	ENSRNOG00000019438	Rnf31	0.413046	0.189285	0.408197	0.380986	0.532155	0.256956	7.56045	5.26039	5.48163	3.59518	7.23204e-05
ENSRNOT00000027436	1	-	100836990	100845392	ENSRNOT00000027436	17	2336	ENSRNOG00000020191	Tbc1d17	2.64342	1.11525	1.19561	0.8578	4.71129	1.78426	8.35002	8.24027	6.34118	2.14769	7.26347e-05
ENSRNOT00000081984	3	+	91463660	91478097	ENSRNOT00000081984	7	987	ENSRNOG00000004755	Commd9	1.24408	1.56913	2.02221	2.03135	0.935791	0.877	0.596704	0.482316	0.824115	-1.06109	7.82656e-05
ENSRNOT00000011079	7	-	119978983	119996824	ENSRNOT00000011079	8	1770	ENSRNOG00000008133	Mfng	3.60332	3.01289	6.33234	2.45653	1.51194	1.9878	1.31953	1.49194	1.20848	-1.21213	8.13554e-05
ENSRNOT00000013936	8	+	5768811	5778702	ENSRNOT00000013936	10	2440	ENSRNOG00000009907	Mmp8	1.27219	0.817936	2.12989	0.079774	0.020795	0.188021	0.009979	0.048994	0.071511	-3.81853	8.16832e-05
ENSRNOT00000021357	10	-	56492300	56506446	ENSRNOT00000021357	22	2468	ENSRNOG00000015674	Acap1	5.67589	4.10419	13.0113	2.96721	1.22533	2.46799	1.44784	1.70375	1.42751	-1.81034	8.59327e-05
ENSRNOT00000014139	2	-	243175346	243224883	ENSRNOT00000014139	9	3058	ENSRNOG00000010575	Dapp1	2.95772	2.39399	6.78628	1.81943	0.742773	1.26584	1.1301	0.799161	1.13462	-1.63136	8.64634e-05
ENSRNOT00000055270	7	-	145172493	145174771	ENSRNOT00000055270	4	602	ENSRNOG00000036826	Glycam1	17.861	7.27183	38.5663	10.6753	0.12643	3.24061	0.525793	0.066267	1.10385	-4.04383	8.72805e-05
ENSRNOT00000022167	19	-	10674189	10681145	ENSRNOT00000022167	3	1745	ENSRNOG00000016535	Ccl22	0.676545	0.416294	1.18923	0.291011	0.126488	0.097823	0.164787	0.123793	0.251918	-1.90655	8.78228e-05
MSTRG.22508.3	8	-	94225515	94243137	MSTRG.22508.3	13	1983	ENSRNOG00000009515	Pgm3	1.72229	3.07907	1.86038	2.62028	5.15716	3.81818	3.21421	4.65562	4.56204	1.0136	9.05537e-05
ENSRNOT00000031746	10	+	67862054	67863255	ENSRNOT00000031746	1	1202	ENSRNOG00000021685	Cdk5r1	0.735293	0.602394	2.27989	0.410023	0.06332	0.213255	0.076445	0.159914	0.262271	-2.52296	9.24955e-05
ENSRNOT00000025965	17	+	1305016	1421685	ENSRNOT00000025965	19	5569	ENSRNOG00000019175	Ercc6l2	1.76536	0	3.01377	0.006581	0	0	0	0	0	-12.447	9.68924e-05
ENSRNOT00000049349	9	+	47536824	47588677	ENSRNOT00000049349	5	2708	ENSRNOG00000028945	Tmem182	1.33743	0.196093	0.405917	0.449809	0.070202	0.017849	0.035785	0.169289	0.032916	-3.05054	9.82415e-05
ENSRNOT00000080142	8	+	97439161	97458267	ENSRNOT00000080142	12	1734	ENSRNOG00000014064	Ctsh	0.444053	0.295409	0.256088	0.086431	4.13457	5.41017	5.38139	0.296143	0.37183	3.64104	9.93428e-05
ENSRNOT00000090938	14	-	17606001	17616170	ENSRNOT00000090938	5	796	ENSRNOG00000058724	Thap6	0.062855	0.078596	5.58775	5.16603	0.159718	0.098327	0.076554	0.042924	0.105161	-4.57368	9.94787e-05
ENSRNOT00000093352	7	-	107262929	107385528	ENSRNOT00000093352	7	2258	ENSRNOG00000025460	Tmem71	0.984089	0.848148	2.41407	0.533977	0.105316	0.33751	0.254517	0.361858	0.250181	-2.03621	9.94872e-05
ENSRNOT00000021268	2	-	203666637	203680083	ENSRNOT00000021268	5	1215	ENSRNOG00000015821	Cd2	2.16767	2.36092	5.97159	1.55354	0.250571	0.65639	0.619762	0.816845	0.995736	-2.01618	0.000103287
ENSRNOT00000035498	13	-	90002783	90022269	ENSRNOT00000035498	10	1968	ENSRNOG00000025069	Ly9	0.768133	0.655384	2.4509	0.577285	0.156158	0.36093	0.141409	0.146671	0.302935	-2.16441	0.000104792
ENSRNOT00000080714	10	+	104377748	104403715	ENSRNOT00000080714	26	4112	ENSRNOG00000004834	Llgl2	1.06293	1.0974	1.80764	0.752251	1.45091	5.76889	2.61967	9.817	4.74726	2.18308	0.000107145
ENSRNOT00000078140	20	-	32120661	32139789	ENSRNOT00000078140	4	1231	ENSRNOG00000000394	Srgn	1.95274	13.5556	1.61251	8.03672	1.00699	1.05316	0.636228	1.30802	0.719957	-2.62329	0.000107922
ENSRNOT00000066377	3	-	21830822	21904270	ENSRNOT00000066377	17	3065	ENSRNOG00000010150	Strbp	0.00095	0.033028	0.056552	0.039005	11.4709	0.00218	0.002681	11.4977	0.020893	7.25184	0.000113297
ENSRNOT00000071515	9	-	9909948	9912276	ENSRNOT00000071515	3	1304	ENSRNOG00000045595	Tnfsf9	0.997795	0.918373	2.33558	0.723111	0.330747	0.401426	0.407921	0.361809	0.527716	-1.45664	0.000116254
MSTRG.12046.1	2	+	54460367	54533841	MSTRG.12046.1	18	3185	ENSRNOG00000024115	C6	3.94931	0.66923	1.19443	1.06508	0.368611	0.357587	0.499681	0.344276	0.268299	-2.09129	0.000118712
ENSRNOT00000024460	1	-	43567842	43638161	ENSRNOT00000024460	9	1516	ENSRNOG00000018163	Ipcef1	0.964157	1.25776	2.89799	0.4473	0.218089	0.460599	0.239253	0.209498	0.097173	-2.35376	0.000118911
ENSRNOT00000009811	7	+	116632506	116634293	ENSRNOT00000009811	4	820	ENSRNOG00000007475	Gpihbp1	4.64629	0.703616	1.06487	1.45713	0.455324	0.206304	0.326128	0.405496	0.106547	-2.57236	0.000121226
ENSRNOT00000007833	13	+	51958834	51972777	ENSRNOT00000007833	10	4413	ENSRNOG00000005807	Ptpn7	2.58371	1.80362	6.20302	1.47721	0.554643	1.13486	0.74232	0.86744	0.646296	-1.78446	0.000121724
ENSRNOT00000019130	19	+	19395655	19404835	ENSRNOT00000019130	4	1368	ENSRNOG00000014202	Snx20	8.73601	6.58561	16.4837	4.43333	2.46161	3.81829	2.23801	2.88155	2.99091	-1.50668	0.000121907
ENSRNOT00000020428	1	+	79989019	79999364	ENSRNOT00000020428	15	2777	ENSRNOG00000015085	Dmpk	1.99406	1.90949	3.14217	4.93594	9.01444	10.1087	9.26262	11.2999	3.39492	1.66579	0.000125474
ENSRNOT00000066328	1	-	101116635	101118825	ENSRNOT00000066328	5	616	ENSRNOG00000020595	Rps11	98.3967	164.404	124.377	272.188	363.821	326.366	295.05	359.769	396.423	1.21703	0.000126192
ENSRNOT00000033613	1	+	227640680	227661311	ENSRNOT00000033613	7	1092	ENSRNOG00000020997	Ms4a4c	0.619631	2.36323	8.78228	1.63237	0.070609	0.598534	0.352812	0.195837	0.438008	-3.16842	0.00012656
ENSRNOT00000060648	7	-	12541061	12741296	ENSRNOT00000060648	23	3933	ENSRNOG00000013220	Arhgap45	8.58837	7.42305	18.8891	5.10998	2.90257	4.26611	2.88592	3.31238	2.74732	-1.48635	0.000127149
ENSRNOT00000029533	13	+	50164563	50175112	ENSRNOT00000029533	6	2211	ENSRNOG00000028250	Lax1	3.91496	2.5205	7.32911	0.645344	0.387824	0.389302	0.649877	0.211576	0.913195	-2.66101	0.000128671
ENSRNOT00000038023	4	-	157744882	157750088	ENSRNOT00000038023	6	1576	ENSRNOG00000027466	Cd27	0.991361	1.012	2.62458	0.587074	0.151673	0.287265	0.091421	0.029025	0.314937	-2.73227	0.000133331
MSTRG.13501.35	20	-	2878047	2920891	MSTRG.13501.35	10	1901	ENSRNOG00000000446	LOC100911983	0.106035	0.122132	0.097899	0.237196	0.131834	7.94734	0.373402	0.554705	1.83947	4.05665	0.000135687
MSTRG.9640.2	17	-	64019	357203	MSTRG.9640.2	4	527	ENSRNOG00000036404	AABR07026777.1	2.24587	0.790942	0.71736	1.7007	0.106893	0.079583	0.30699	0.105631	0	-3.35437	0.000136316
ENSRNOT00000001108	20	-	4861353	4863198	ENSRNOT00000001108	3	1168	ENSRNOG00000000836	LOC103694381	6.58354	6.50604	13.0391	2.46635	1.63733	2.33556	1.42931	2.15624	2.25602	-1.71862	0.000138012
ENSRNOT00000007905	4	+	170958196	170963046	ENSRNOT00000007905	3	463	ENSRNOG00000005947	Pde6h	2.43832	0.880638	5.77875	0.515569	0.243657	0.242019	0.478201	0.043081	0.151771	-3.19658	0.000138685
MSTRG.18020.3	5	-	99412970	99566379	MSTRG.18020.3	46	7680	ENSRNOG00000007894	Mpdz	5.20345	0.058162	2.24304	0.141375	0.054311	0.074991	0.038848	0.13668	0.157123	-4.22138	0.000140171
ENSRNOT00000044417	7	+	11769400	11774387	ENSRNOT00000044417	7	1723	ENSRNOG00000032951	Jsrp1	0.811558	0.601234	1.47285	0.265054	0.043918	0.225984	0.044325	0.023153	0.140166	-2.87855	0.000140769
ENSRNOT00000024344	2	-	209489279	209537087	ENSRNOT00000024344	8	1699	ENSRNOG00000017874	Cd53	18.824	15.4314	30.8034	7.88898	4.78989	7.4845	5.98164	6.67267	5.8579	-1.42451	0.000148345
ENSRNOT00000026556	2	+	206342066	206390348	ENSRNOT00000026556	21	2747	ENSRNOG00000019614	Ptpn22	2.59196	2.25368	6.12696	1.57785	0.627053	1.09221	0.95873	0.942934	1.10775	-1.57908	0.000151106
ENSRNOT00000038994	X	+	14578264	14612547	ENSRNOT00000038994	13	4277	ENSRNOG00000003622	Cybb	14.5099	9.10559	17.8112	8.19178	6.54622	4.73465	4.47885	6.2628	4.73271	-1.06873	0.000153787
MSTRG.1888.1	1	-	198123884	198130114	MSTRG.1888.1	12	2082	ENSRNOG00000019430	Coro1a	0	33.1199	103.616	16.6914	0	0	0	0.057482	0	-11.5509	0.000154638
ENSRNOT00000028965	4	-	157425644	157433467	ENSRNOT00000028965	8	1866	ENSRNOG00000021334	Lag3	1.15133	0.744838	5.35424	0.996403	0.290527	0.38543	0.543856	0.253339	0.262134	-2.40103	0.000154641
ENSRNOT00000028407	10	-	90236928	90240509	ENSRNOT00000028407	12	1299	ENSRNOG00000020930	Atxn7l3	0.125565	0.067932	0.108063	0.103034	4.30817	0.106086	3.4499	0.35631	0.128076	4.15291	0.000154921
ENSRNOT00000014103	4	-	145674157	145678066	ENSRNOT00000014103	4	500	ENSRNOG00000010349	Ghrl	14.3412	6.42523	10.6042	11.7433	14.3868	22.7643	23.0125	49.5517	34.7538	1.55991	0.000160063
ENSRNOT00000014317	2	-	139453774	139528162	ENSRNOT00000014317	12	8894	ENSRNOG00000010210	Slc7a11	1.14309	0.582807	4.68531	0.520105	0.200798	0.38619	0.207642	0.231166	0.278458	-2.5644	0.000162666
ENSRNOT00000089625	11	-	64827635	64855353	ENSRNOT00000089625	5	4433	ENSRNOG00000001527	Cd80	0.386797	0.326837	2.2782	0.54759	0.135884	0.224877	0.176259	0.090648	0.121107	-2.39467	0.000162728
ENSRNOT00000010938	7	-	12918710	12922112	ENSRNOT00000010938	5	1279	ENSRNOG00000008217	Madcam1	3.03479	2.75093	6.94489	1.97502	0.981354	1.41532	0.845431	1.34681	1.30797	-1.48921	0.000164747
MSTRG.23391.1	9	+	52988029	53009039	MSTRG.23391.1	5	2282	ENSRNOG00000003942	Asnsd1	0.014583	0.014805	0.010129	0.012992	0.017519	2.96302	0.009466	0.383018	0.013711	5.5937	0.000166611
ENSRNOT00000091237	9	+	67699379	67706065	ENSRNOT00000091237	4	1883	ENSRNOG00000054129	Ctla4	1.15803	0.835374	2.91823	0.604578	0.290485	0.340752	0.323437	0.501644	0.215901	-1.88524	0.000166677
ENSRNOT00000009211	10	-	31431809	31493419	ENSRNOT00000009211	17	4261	ENSRNOG00000006860	Itk	1.07114	0.806367	4.09216	0.988998	0.334616	0.594753	0.339853	0.337297	0.308404	-2.02321	0.000168081
ENSRNOT00000032742	4	+	78320190	78327144	ENSRNOT00000032742	3	1491	ENSRNOG00000008369	Gimap4	11.4512	9.80972	22.7615	6.77269	3.2759	4.7789	3.60848	5.42602	4.77084	-1.39149	0.00016868
ENSRNOT00000073294	9	-	9617786	9675110	ENSRNOT00000073294	29	2532	ENSRNOG00000050430	Vav1	5.5883	4.68947	11.7053	3.26257	1.61429	2.58834	1.98385	1.7544	2.43017	-1.45641	0.000169022
ENSRNOT00000016077	7	+	120465130	120484840	ENSRNOT00000016077	13	1828	ENSRNOG00000011507	Pick1	0.114252	0.211398	0.193286	0.119375	1.60618	1.27234	0.880396	0.183756	0.290045	2.52251	0.000169902
MSTRG.13868.1	20	+	12225168	12332928	MSTRG.13868.1	42	5138	ENSRNOG00000001229	Col18a1	1.33731	1.22811	1.34669	2.0482	13.322	1.84294	1.74887	13.6553	12.5164	2.67863	0.000169938
ENSRNOT00000088856	1	-	216808632	216828651	ENSRNOT00000088856	8	2416	ENSRNOG00000043486	Tnfrsf26	2.47602	2.35749	5.03546	1.5594	0.968116	1.30838	0.982722	1.10923	0.979631	-1.27114	0.000170697
ENSRNOT00000060683	7	-	12440751	12457513	ENSRNOT00000060683	10	3119	ENSRNOG00000014287	Stk11	0.311226	0.224291	0.196331	0.360653	0.473824	0.529103	1.67043	0.5953	0.772223	1.69411	0.000175194
ENSRNOT00000006387	3	-	44150992	44177689	ENSRNOT00000006387	8	1664	ENSRNOG00000004772	Cytip	12.1999	11.5605	24.3057	6.8348	3.24439	5.54954	5.06457	5.38497	4.30925	-1.39948	0.000177868
ENSRNOT00000049038	4	-	78336423	78342863	ENSRNOT00000049038	3	2358	ENSRNOG00000033338	Gimap6	6.97282	5.90806	12.9429	4.03062	2.66617	3.46508	2.53853	2.95316	2.15926	-1.2922	0.00018066
ENSRNOT00000014772	16	+	17538855	17595960	ENSRNOT00000014772	9	1473	ENSRNOG00000010813	Tspan14	0.18702	0.178588	0.248262	0.279389	14.0031	0.211202	0.261265	0.146128	17.0149	4.97555	0.000181258
ENSRNOT00000026637	9	+	17340341	17355681	ENSRNOT00000026637	8	3546	ENSRNOG00000019598	Vegfa	0.945261	0.789057	0.792338	1.74024	1.8552	1.70912	2.03877	2.2091	2.08173	1.0305	0.000184672
MSTRG.24501.2	X	-	105356538	105398642	MSTRG.24501.2	24	2719	ENSRNOG00000052407	Btk	5.47234	3.3748	4.47153	1.51092	0.625111	1.71437	0.952516	1.14868	0.997142	-1.63933	0.000188543
ENSRNOT00000091946	6	+	136279496	136304095	ENSRNOT00000091946	5	582	ENSRNOG00000058920	Apopt1	0.135822	0.13017	0.172123	0.158247	0.170185	0.169613	0.173887	8.2766	9.94328	4.71803	0.000189583
ENSRNOT00000013460	6	+	135866739	135880721	ENSRNOT00000013460	12	3241	ENSRNOG00000010111	Exoc3l4	1.66817	1.3293	3.29859	0.760907	0.600088	0.490401	0.642538	0.58117	0.481671	-1.50675	0.000197387
ENSRNOT00000010620	8	+	62723788	62745868	ENSRNOT00000010620	14	2622	ENSRNOG00000007687	Sema7a	5.35697	4.02456	10.3576	3.5681	2.55647	2.47253	2.12696	2.05088	1.84764	-1.24819	0.000200028
ENSRNOT00000075047	10	+	106785077	106795299	ENSRNOT00000075047	16	2654	ENSRNOG00000046086	Tmc8	1.22164	0.928504	3.8937	1.40271	0.555962	0.731791	0.386081	0.339696	0.303379	-1.84698	0.000202568
ENSRNOT00000044231	1	-	183763482	183763664	ENSRNOT00000044231	1	183	ENSRNOG00000032130	LOC691427	3.37448	3.04658	1.83418	2.53002	3.4866	4.24553	6.26306	7.18967	6.82948	1.17391	0.000203236
ENSRNOT00000070805	9	+	15313523	15314435	ENSRNOT00000070805	2	225	ENSRNOG00000046316	Tomm6	7.48449	5.2247	5.70374	4.90343	7.34131	12.3872	8.88672	12.6581	18.4823	1.16926	0.000204538
ENSRNOT00000026929	9	-	17823400	17827032	ENSRNOT00000026929	4	1852	ENSRNOG00000019900	Slc35b2	0.115891	0.04309	0.121472	0.056403	1.19519	0.075602	0.302219	0.266885	2.33291	3.45412	0.000206671
ENSRNOT00000022384	1	+	256101903	256107649	ENSRNOT00000022384	4	1761	ENSRNOG00000016595	Hhex	1.64096	1.29814	2.83315	0.965075	0.823489	0.65978	0.602231	0.604169	0.469816	-1.26446	0.000214805
ENSRNOT00000042798	3	-	9861237	9936405	ENSRNOT00000042798	16	2099	ENSRNOG00000008258	Fnbp1	0.429289	0.264894	0.612384	0.63961	0.97289	0.73793	1.08782	1.00367	0.735408	1.04967	0.000227842
ENSRNOT00000001541	20	+	9948908	9985133	ENSRNOT00000001541	14	2123	ENSRNOG00000001167	Ubash3a	0.668672	0.603322	2.31922	0.744648	0.266708	0.421833	0.316348	0.230888	0.211134	-1.74189	0.0002306
ENSRNOT00000018318	2	-	218654554	218658761	ENSRNOT00000018318	2	2571	ENSRNOG00000013683	S1pr1	5.7192	5.25751	10.8252	4.43787	3.12827	3.42588	2.33185	2.68419	2.61189	-1.06319	0.000232525
MSTRG.14301.3	3	-	3856218	3890758	MSTRG.14301.3	31	7996	ENSRNOG00000019122	Sec16a	0	0	0	0	0	0	1.09804	0.88386	0.532321	11.8677	0.000234375
ENSRNOT00000036027	11	+	30904733	30915225	ENSRNOT00000036027	3	836	ENSRNOG00000021524	Mrap	3.41536	0.480212	0.332923	0.751313	0.198167	0.158994	0.043687	0.223244	0.04958	-3.04684	0.000235087
ENSRNOT00000005903	6	+	124786097	124872277	ENSRNOT00000005903	14	6046	ENSRNOG00000004442	Dglucy	0.436709	0.843351	0.413159	0.628976	0.504144	3.05239	5.66169	1.37527	3.72344	2.42223	0.000235338
ENSRNOT00000002522	11	+	80255790	80279075	ENSRNOT00000002522	10	3389	ENSRNOG00000001843	Bcl6	4.31726	3.31453	7.87736	2.74696	1.77781	1.29477	1.84402	2.18271	1.57618	-1.24698	0.000240883
ENSRNOT00000040147	1	+	129255396	129334292	ENSRNOT00000040147	9	3008	ENSRNOG00000022822	Fam169b	0.516807	0.302151	1.00778	0.379144	0.177989	0.17801	0.167601	0.208142	0.07359	-1.62228	0.000242141
ENSRNOT00000059921	17	-	32770739	32783427	ENSRNOT00000059921	6	1133	ENSRNOG00000016420	Serpinb6b	5.68415	4.27681	13.8415	1.84868	0.675048	1.90212	0.599644	1.50006	1.33595	-2.2635	0.000247909
ENSRNOT00000005619	13	+	89774764	89796113	ENSRNOT00000005619	12	3672	ENSRNOG00000004192	Arhgap30	10.7415	7.4214	20.0004	4.15825	2.24865	4.25154	2.49194	3.32379	2.83574	-1.65768	0.000263608
ENSRNOT00000088198	10	+	70520206	70621965	ENSRNOT00000088198	22	5403	ENSRNOG00000061543	Ap2b1	4.34151	3.67313	3.67615	5.47268	7.89711	12.3075	5.96011	5.50405	8.73598	1.04919	0.000265499
ENSRNOT00000077285	9	+	81535483	81548724	ENSRNOT00000077285	3	465	ENSRNOG00000014289	Arpc2	1.35293	1.02643	0	1.64746	0	0	0	0	0	-8.66548	0.000266816
ENSRNOT00000032289	16	-	25001666	25192675	ENSRNOT00000032289	5	765	ENSRNOG00000026310	2020-03-01	1.61068	1.73902	4.08508	1.18259	0.850784	0.377577	0.521659	0.689601	0.776661	-1.58535	0.00028955
ENSRNOT00000004094	14	-	71798651	71814523	ENSRNOT00000004094	9	957	ENSRNOG00000003064	Bst1	1.91382	1.99176	3.86989	1.04549	0.453634	0.65018	0.817291	0.789867	0.925916	-1.45129	0.00031293
ENSRNOT00000012645	4	-	119249682	119327822	ENSRNOT00000012645	11	3412	ENSRNOG00000009347	Arhgap25	3.84203	2.94546	8.94164	2.14653	1.29935	1.65031	1.26549	1.37806	1.55194	-1.49238	0.000326271
ENSRNOT00000021705	2	-	252368329	252382955	ENSRNOT00000021705	9	1395	ENSRNOG00000015969	Rpf1	1.83831	1.17731	3.34973	2.84591	1.7883	12.1353	11.762	10.254	6.88665	2.03725	0.000329419
ENSRNOT00000023036	9	+	43331155	43353113	ENSRNOT00000023036	13	2219	ENSRNOG00000016995	Zap70	1.95122	1.90875	6.00978	1.79786	0.509806	1.32877	0.813913	0.735593	0.689822	-1.68676	0.000332008
MSTRG.16329.7	4	+	61853358	62026638	MSTRG.16329.7	5	544	ENSRNOG00000009875	Akr1b7	0.015646	0.083879	0.199283	0	1.35807	0.012646	0.994336	6.1687	1.77769	4.85956	0.000337101
ENSRNOT00000033373	5	-	60007587	60191941	ENSRNOT00000033373	14	1176	ENSRNOG00000024729	Pax5	2.93649	1.92719	10.846	1.1225	0.021573	0.483915	0.137496	0	0.159004	-4.54667	0.00034172
ENSRNOT00000082422	13	-	83855444	83917021	ENSRNOT00000082422	7	1928	ENSRNOG00000003283	Rcsd1	3.06912	2.00675	3.87751	1.21281	0.950967	1.20721	0.672189	0.465307	0.768495	-1.50139	0.000347036
ENSRNOT00000005774	6	-	41016730	41039437	ENSRNOT00000005774	3	2678	ENSRNOG00000004110	Trib2	5.79131	5.15132	13.5911	3.37554	1.83623	2.73602	2.67558	2.17481	2.10123	-1.44918	0.000347082
ENSRNOT00000008034	3	-	5568321	5575136	ENSRNOT00000008034	10	2126	ENSRNOG00000005900	Slc2a6	2.22386	2.09786	5.44867	1.15374	0.622482	0.960362	0.693612	0.654893	1.04581	-1.62646	0.000349927
ENSRNOT00000007649	13	-	111892760	111917587	ENSRNOT00000007649	15	2058	ENSRNOG00000005565	Traf3ip3	3.1357	3.06768	7.26689	0.565275	0.581974	0.429178	0.945405	0.554957	0.786446	-2.2588	0.000362797
ENSRNOT00000088279	10	-	4635898	4644570	ENSRNOT00000088279	2	2905	ENSRNOG00000058739	Snn	5.35773	4.27632	8.37151	3.00487	2.17465	2.60203	2.22775	2.50061	2.17354	-1.02566	0.000379641
ENSRNOT00000035973	10	-	94350817	94352880	ENSRNOT00000035973	5	1145	ENSRNOG00000025448	Limd2	18.4786	17.0268	55.4893	5.58765	3.11876	8.30873	4.12283	3.90832	3.09997	-2.27001	0.000381546
MSTRG.21542.2	7	-	140981772	141033279	MSTRG.21542.2	25	4008	ENSRNOG00000056297	Fmnl3	1.43648	1.33331	4.44688	1.32369	0.629089	0.672423	0.705949	0.830739	0.621435	-1.46964	0.000383535
ENSRNOT00000005006	13	-	44166306	44345735	ENSRNOT00000005006	8	1804	ENSRNOG00000003769	Tmem163	0.20401	0.159933	1.04645	0.116061	0.014063	0.046887	0.053897	0.044227	0.088667	-2.75874	0.000392751
ENSRNOT00000073847	2	-	49087226	49128501	ENSRNOT00000073847	15	1568	ENSRNOG00000010824	Parp8	2.64058	2.39648	4.55158	1.67094	0.387323	1.45654	0.976191	0.863619	0.677553	-1.55083	0.00040446
ENSRNOT00000072081	10	-	34425069	34439470	ENSRNOT00000072081	9	1590	ENSRNOG00000046377	Btnl9	0.962054	0.422415	0.736116	1.16172	0.233686	0.401816	0.353891	0.201859	0.356645	-1.26183	0.000411402
MSTRG.23277.14	9	-	37902341	38202249	MSTRG.23277.14	100	23866	ENSRNOG00000012207	Dst	0.100117	0.068658	0.34897	0.076894	0.519239	1.70053	0.263934	0.812319	0.428771	2.47792	0.000417305
ENSRNOT00000026891	1	-	85312528	85317968	ENSRNOT00000026891	7	567	ENSRNOG00000019838	Gmfg	7.69887	1.18736	34.2929	1.39129	1.34011	0.790848	1.01038	0.523088	1.26079	-3.30965	0.000420145
ENSRNOT00000011925	8	+	33816386	33879625	ENSRNOT00000011925	8	5031	ENSRNOG00000008941	Ets1	16.5433	14.7851	36.2985	10.7042	7.43554	8.05444	7.05616	7.9588	7.04707	-1.2339	0.000423912
MSTRG.15084.6	3	-	94353094	94420518	MSTRG.15084.6	16	3736	ENSRNOG00000011358	Hipk3	0	0	0.007094	0	0	11.1334	7.44722	0	0	11.0463	0.000428095
MSTRG.16445.8	4	-	72046002	72074736	MSTRG.16445.8	10	2513	ENSRNOG00000050703	Fam115c	0.009857	0.081544	0.048297	0.073805	0.018782	0.146374	0.114046	3.83984	1.46966	4.46853	0.000449688
ENSRNOT00000014235	16	-	48937456	48981980	ENSRNOT00000014235	20	3661	ENSRNOG00000010633	Acsl1	62.9417	17.244	22.4807	29.0171	12.4052	9.91901	11.2809	13.07	9.92731	-1.40632	0.000451782
ENSRNOT00000024912	1	+	212558257	212562051	ENSRNOT00000024912	5	635	ENSRNOG00000018446	Prap1	0.26527	0.2692	0.42369	0.306386	0.597167	0.513027	0.415518	1.05051	1.19289	1.40686	0.000459006
MSTRG.2043.5	1	-	207993898	208020456	MSTRG.2043.5	15	9882	ENSRNOG00000028137	Mki67	9.94313	9.78507	19.8354	14.255	5.15199	3.82133	8.65601	5.42686	3.95547	-1.17054	0.000465195
ENSRNOT00000010516	5	-	79184088	79222687	ENSRNOT00000010516	22	5353	ENSRNOG00000008005	Akna	3.4409	2.59703	11.799	2.96286	1.16986	1.91729	1.48604	0.941589	1.27965	-1.77753	0.000466713
ENSRNOT00000029443	1	+	226897625	226912708	ENSRNOT00000029443	8	2251	ENSRNOG00000021644	Slc15a3	3.86132	3.11849	7.52705	2.16276	1.22663	1.91308	1.32547	1.70554	1.52393	-1.29017	0.000482761
ENSRNOT00000036025	7	-	126775516	126913585	ENSRNOT00000036025	35	8907	ENSRNOG00000021285	Celsr1	0.404143	0.648683	1.1071	0.460677	0.244334	0.335665	0.256462	0.168866	0.141175	-1.37127	0.000483379
ENSRNOT00000014065	8	+	5993941	5997383	ENSRNOT00000014065	3	2575	ENSRNOG00000010584	Tmem123	3.57067	0.995579	4.3341	1.9527	12.5821	5.16555	3.41901	24.7755	17.1157	2.37005	0.000493681
ENSRNOT00000025312	16	+	20110148	20120668	ENSRNOT00000025312	23	3748	ENSRNOG00000018669	Jak3	0.672794	0.526994	1.32582	0.451416	0.158421	0.110586	0.38728	0.109358	0.212444	-1.77485	0.000497039
ENSRNOT00000026705	2	-	187842885	187863516	ENSRNOT00000026705	12	3075	ENSRNOG00000019638	Lmna	66.4728	92.5087	48.4378	68.3939	184.492	78.2601	118.294	155.577	180.104	1.18621	0.000524347
ENSRNOT00000023080	1	-	198544262	198559568	ENSRNOT00000023080	4	1203	ENSRNOG00000016980	Qprt	1.33481	0.939877	1.47363	0.392142	0.312823	0.329446	0.337361	0.429657	0.4221	-1.35237	0.000528179
ENSRNOT00000001158	X	-	159723866	159841072	ENSRNOT00000001158	22	2786	ENSRNOG00000000869	Arhgef6	2.55893	2.36927	6.5703	2.51861	1.21573	1.59357	1.42834	1.48104	1.20714	-1.18795	0.00053299
ENSRNOT00000090536	17	-	9777842	9791781	ENSRNOT00000090536	15	2905	ENSRNOG00000015616	Rgs14	1.78245	1.56927	3.36788	1.15693	0.731764	1.11571	0.546027	0.572255	0.679936	-1.28663	0.000537665
ENSRNOT00000015210	9	+	12740885	12942358	ENSRNOT00000015210	10	2826	ENSRNOG00000011321	Rftn1	7.24518	5.85233	14.3609	4.09963	2.86475	3.47518	2.30245	3.28252	2.79359	-1.27414	0.000538105
ENSRNOT00000084892	6	-	138114364	138662511	ENSRNOT00000084892	7	1398	ENSRNOG00000034190	AABR07065625.1	0.873145	0.461709	1.04335	0.281562	0.038232	0.269276	0.071515	0.01721	0.056466	-2.71084	0.000542509
ENSRNOT00000063808	1	-	89043086	89045586	ENSRNOT00000063808	5	1951	ENSRNOG00000042465	Zbtb32	1.3179	0.694926	2.53982	0.337992	0.013004	0.370207	0.059612	0.030671	0.073101	-3.32572	0.0005709
MSTRG.19519.2	6	-	76386430	76599538	MSTRG.19519.2	32	8344	ENSRNOG00000046256	Ralgapa1	4.02571	3.16018	6.00831	5.75224	1.21776	3.28775	1.33033	1.1543	1.22525	-1.3872	0.000576441
ENSRNOT00000085022	8	-	49232176	49271834	ENSRNOT00000085022	21	3695	ENSRNOG00000026833	Ube4a	0.457633	0.861576	1.43117	1.16329	0.398953	0.424934	0.476476	0.401661	0.38381	-1.08189	0.000588708
ENSRNOT00000003326	11	-	66736966	66759402	ENSRNOT00000003326	14	1950	ENSRNOG00000038881	Hcls1	15.0668	12.1822	25.7526	5.43654	3.54592	5.77795	3.72354	5.63962	4.93643	-1.48541	0.000588955
ENSRNOT00000087076	10	+	88914276	88967732	ENSRNOT00000087076	22	3995	ENSRNOG00000036814	Atp6v0a1	1.23789	0.067364	0.173797	3.3316	0.160917	0.111171	0.103047	0.098638	0.087516	-3.26433	0.000595114
ENSRNOT00000092143	X	+	14498283	14534431	ENSRNOT00000092143	3	4847	ENSRNOG00000003749	Xk	0.528683	0.566428	0.280022	0.649359	4.08167	0.401701	4.82987	0.662652	4.63198	2.66444	0.000600202
ENSRNOT00000020982	5	-	58181026	58183017	ENSRNOT00000020982	4	762	ENSRNOG00000015668	Ccl19	19.1664	21.2866	58.9615	6.2838	0.032184	5.24027	0.716495	0.155924	0.651911	-4.14273	0.000609756
ENSRNOT00000012887	4	-	179486105	179515558	ENSRNOT00000012887	5	1295	ENSRNOG00000009338	Kras	0.371221	0.806089	0.265328	0.224784	1.35043	7.98204	1.95082	1.69773	0.47383	2.78434	0.000615307
ENSRNOT00000071605	4	+	102403451	102403750	ENSRNOT00000071605	1	300	ENSRNOG00000053275	AABR07060995.1	5.46237	1.70237	0.079103	0.049385	0.04036	0.060013	0.232446	0.040061	0.015069	-4.37503	0.000620666
MSTRG.18587.5	5	-	150084611	150217643	MSTRG.18587.5	19	3150	ENSRNOG00000010037	Epb41	2.59966	1.65505	4.21634	1.8083	1.08197	1.43067	1.05349	1.07392	1.09649	-1.01582	0.000620672
ENSRNOT00000045874	6	-	138092131	138093643	ENSRNOT00000045874	4	1002	ENSRNOG00000048402	Igh-6	33.0352	42.605	32.9815	9.56351	2.91487	9.85562	9.19021	10.5429	5.5997	-1.83647	0.000628285
ENSRNOT00000081951	10	+	75088422	75098258	ENSRNOT00000081951	13	2447	ENSRNOG00000008310	Mpo	2.46614	0.384976	0.572638	1.68608	0.042799	0.011002	0.009917	0.306111	0.009107	-3.93135	0.000661078
ENSRNOT00000085310	10	-	5213350	5253336	ENSRNOT00000085310	19	5076	ENSRNOG00000002659	Ciita	3.90063	2.389	8.59592	1.07626	0.002663	0.558384	0.009101	0.225987	0.259895	-4.09021	0.000663463
ENSRNOT00000003182	10	+	47490153	47499876	ENSRNOT00000003182	11	1751	ENSRNOG00000002331	Aldh3a1	0.920229	0.836172	2.13652	0.286029	0.180871	0.358481	0.284949	0.113756	0.247873	-1.99188	0.000671368
MSTRG.4104.7	10	-	67476007	67479507	MSTRG.4104.7	4	1423	ENSRNOG00000004000	Tefm	0.494517	0.024869	0.088614	0.032966	1.34655	3.53351	3.5887	4.09976	0.026013	4.08297	0.000683497
ENSRNOT00000074738	15	-	38647779	38709984	ENSRNOT00000074738	9	1275	ENSRNOG00000053891	AABR07018078.1	0.718463	1.34155	2.60511	0.626981	0.153446	0.370324	0.10104	0.244699	0.512666	-2.09661	0.000686938
ENSRNOT00000080856	9	-	9980720	9985358	ENSRNOT00000080856	4	2478	ENSRNOG00000047322	Crb3	1.82803	2.07194	7.69552	14.4849	2.10306	0.429011	0.588477	1.1261	0.501261	-2.61397	0.000688083
ENSRNOT00000021866	19	+	41710102	41724923	ENSRNOT00000021866	3	1374	ENSRNOG00000016291	Marveld3	0.189467	0.370168	0.32599	0.460413	0.748105	0.386494	4.07259	0.644956	4.13877	2.70273	0.000688151
ENSRNOT00000005686	7	-	64923615	64982281	ENSRNOT00000005686	12	3165	ENSRNOG00000004226	Irak3	2.04544	1.38993	4.11247	1.49941	0.9894	0.828095	0.868088	0.970156	0.935475	-1.14765	0.000692787
ENSRNOT00000055148	3	+	161519743	161534704	ENSRNOT00000055148	9	1378	ENSRNOG00000018488	Cd40	2.53327	2.03505	5.90751	1.74888	0.984187	1.41679	1.12813	1.08663	0.945873	-1.30651	0.000694324
ENSRNOT00000093672	7	-	107584118	107634287	ENSRNOT00000093672	8	2568	ENSRNOG00000056714	Sla	4.31078	3.21233	8.45453	2.84801	1.48546	2.2631	2.12342	1.71654	1.80417	-1.17739	0.000697328
ENSRNOT00000059156	4	+	78378144	78384827	ENSRNOT00000059156	3	1510	ENSRNOG00000008416	Gimap5	1.76527	1.78061	3.95952	0.944479	0.813118	0.70059	0.62016	0.783155	0.816253	-1.34726	0.000702714
ENSRNOT00000030082	7	+	126619196	126681752	ENSRNOT00000030082	8	2021	ENSRNOG00000021463	Ppara	0.412901	0.079983	0.393521	0.438033	3.27223	0.504212	5.4047	0.228381	3.09161	3.06768	0.000710482
MSTRG.21672.1	7	-	144970444	144993652	MSTRG.21672.1	30	4392	ENSRNOG00000057451	Itga5	2.94892	1.88359	1.39305	1.64368	4.77231	2.66041	4.5275	2.91885	4.10201	1.07959	0.000718836
ENSRNOT00000044975	20	-	5468078	5476193	ENSRNOT00000044975	8	1727	ENSRNOG00000029500	Tapbp	1.59505	1.05474	1.21531	0.527256	1.35875	20.5252	0.880487	74.8475	0.86188	4.27904	0.0007329
MSTRG.9802.2	17	-	15447716	15468612	MSTRG.9802.2	9	1552	ENSRNOG00000047786	Ogn	0.652821	0.21993	1.24287	0.707405	2.51323	0.678313	2.24965	5.29162	3.82983	2.20224	0.000737579
ENSRNOT00000066226	5	+	68717519	68763850	ENSRNOT00000066226	25	5373	ENSRNOG00000022325	Smc2	9.97803	10.4107	11.2193	2.38771	2.35255	2.79411	2.08535	3.22396	3.06197	-1.521	0.000739214
ENSRNOT00000073289	X	+	15155230	15164105	ENSRNOT00000073289	12	1742	ENSRNOG00000031058	Was	4.4274	3.53298	10.714	2.14794	0.926529	1.86437	1.45097	1.54025	1.84878	-1.61729	0.000751086
ENSRNOT00000014670	18	-	68957553	68983619	ENSRNOT00000014670	9	3400	ENSRNOG00000028677	LOC361346	1.73672	1.47879	3.20324	1.21827	0.727542	0.747556	0.829975	0.918794	1.01794	-1.02166	0.000753351
ENSRNOT00000012975	5	-	57358327	57372239	ENSRNOT00000012975	7	1267	ENSRNOG00000009686	Aqp7	6.52377	3.23	1.79183	2.82963	0.798586	1.06574	0.694192	1.93587	0.761926	-1.65021	0.000768425
MSTRG.11544.1	19	+	50039428	50173862	MSTRG.11544.1	34	4637	ENSRNOG00000051986	Plcg2	7.63828	5.03	18.8298	4.32711	2.40727	2.95012	2.18818	2.52665	3.58311	-1.5563	0.000770122
ENSRNOT00000022375	17	-	85533057	85557939	ENSRNOT00000022375	5	2757	ENSRNOG00000016670	AABR07028769.1	3.72526	2.51396	7.18916	2.33913	1.13326	1.88377	1.69057	1.53074	1.24484	-1.24949	0.000789398
MSTRG.22027.3	8	-	48997173	49031688	MSTRG.22027.3	18	5103	ENSRNOG00000026985	Phldb1	4.52677	1.16834	0.675693	3.74633	0.001512	0.085327	0.043752	0.560002	0.064039	-3.93964	0.000802209
ENSRNOT00000091223	8	-	62405984	62424303	ENSRNOT00000091223	13	2052	ENSRNOG00000019374	Csk	13.2164	10.4217	29.0255	11.93	7.5151	7.03573	7.34126	6.2516	6.72394	-1.05937	0.000802273
ENSRNOT00000064081	20	+	48503973	48574546	ENSRNOT00000064081	14	3107	ENSRNOG00000000581	Cdc40	0.069449	0.168968	0.116635	1.33753	0.047857	0.052272	0.082107	0.023799	0.03232	-2.98755	0.000820189
ENSRNOT00000003198	13	-	102809549	102942863	ENSRNOT00000003198	19	2944	ENSRNOG00000002339	Mark1	1.26	0.529697	0.993335	1.18861	0.2652	0.316373	0.562419	0.178538	0.420133	-1.36281	0.00082369
ENSRNOT00000032816	10	+	43817947	43828811	ENSRNOT00000032816	7	1087	ENSRNOG00000026844	Lypd8	0.594638	29.9586	1409.52	2426.27	0.764556	26.4651	29.8703	0.458679	36.2277	-5.51955	0.000826271
ENSRNOT00000068037	8	-	33543258	33661049	ENSRNOT00000068037	9	1820	ENSRNOG00000008904	Fli1	5.1619	4.62348	8.70782	2.95109	2.09342	2.68669	2.22325	2.6928	2.31219	-1.01568	0.000827521
ENSRNOT00000020532	17	-	14607442	14627937	ENSRNOT00000020532	7	2650	ENSRNOG00000029792	NEWGENE_1308171	2.2429	2.68117	1.26907	1.42203	0.511668	0.951399	0.317063	0.225334	0.738818	-1.67037	0.000846542
ENSRNOT00000006658	6	-	26284748	26314844	ENSRNOT00000006658	14	3355	ENSRNOG00000039815	Zfp512	0.9777	0.85261	1.1248	0.725947	2.33699	0.872227	1.47053	3.13713	2.85305	1.35475	0.000880425
ENSRNOT00000005459	13	-	102698546	102721218	ENSRNOT00000005459	7	1942	ENSRNOG00000004101	Marc1	4.94956	1.1471	2.29882	2.70817	0.982194	1.0046	1.11816	1.07939	0.659849	-1.38162	0.000899551
ENSRNOT00000037874	7	+	138707426	138846123	ENSRNOT00000037874	5	1997	ENSRNOG00000022807	Pced1b	0.967369	0.633985	2.7361	1.15996	0.519881	0.516985	0.420344	0.338169	0.503007	-1.41881	0.000912958
ENSRNOT00000014701	2	+	93792601	93797305	ENSRNOT00000014701	4	667	ENSRNOG00000010805	Fabp4	319.19	80.5697	75.2372	117.171	46.8419	32.6893	38.0861	61.1517	30.1425	-1.69636	0.000924875
ENSRNOT00000025528	3	-	13957136	13978224	ENSRNOT00000025528	15	3789	ENSRNOG00000018874	Phf19	2.80608	2.21425	4.88272	1.42819	0.983843	1.334	1.19871	1.0106	1.23344	-1.15209	0.000939189
ENSRNOT00000024659	16	+	19999112	20016190	ENSRNOT00000024659	13	3186	ENSRNOG00000018170	Slc27a1	10.9094	2.88634	8.47097	11.9661	3.02822	3.18209	1.51388	1.71136	3.55397	-1.56957	0.000949436
ENSRNOT00000002760	14	-	23576085	23604834	ENSRNOT00000002760	9	1328	ENSRNOG00000002014	Stap1	3.45394	3.22228	8.97175	2.09485	0.909929	1.60535	1.47789	1.44669	1.7549	-1.47157	0.000951678
ENSRNOT00000011316	7	+	123578878	123580839	ENSRNOT00000011316	2	324	ENSRNOG00000008461	Smdt1	49.582	30.7333	18.28	20.853	36.5462	143.146	117.129	45.2698	153.966	1.85476	0.000956054
ENSRNOT00000008055	13	-	47956790	48022333	ENSRNOT00000008055	6	3424	ENSRNOG00000005342	Rassf5	3.2228	2.57965	7.6852	2.36897	1.44226	1.60861	1.5857	1.62177	1.45905	-1.20874	0.000976019
ENSRNOT00000047354	X	+	32232142	32292072	ENSRNOT00000047354	8	2837	ENSRNOG00000029330	Car5b	7.39249	2.1564	2.57839	2.5261	1.00782	0.850065	1.32232	1.64744	0.575215	-1.63241	0.000984221
ENSRNOT00000071226	9	+	67763897	67785580	ENSRNOT00000071226	5	2036	ENSRNOG00000046196	Icos	2.73419	1.74354	6.97931	1.22031	0.413861	1.13226	0.744822	0.288152	0.889832	-2.03471	0.00100988
ENSRNOT00000001169	X	+	159158194	159172518	ENSRNOT00000001169	5	2122	ENSRNOG00000000875	Fhl1	8.13509	7.31649	4.36374	3.91312	11.9829	10.2966	8.70699	14.2195	9.5427	1.00791	0.00103801
MSTRG.3301.2	10	-	15211679	15228464	MSTRG.3301.2	41	6132	ENSRNOG00000020006	Wdr90	0.010279	0.149488	0.013379	0.031262	0.274224	0.294595	0.338182	0.054935	2.1148	3.68707	0.00107448
ENSRNOT00000051338	9	+	94745217	94850771	ENSRNOT00000051338	27	4926	ENSRNOG00000017020	Inpp5d	5.77263	4.70259	12.4941	4.14182	2.69218	3.20479	3.09125	2.57613	2.47234	-1.12243	0.00107946
ENSRNOT00000080418	12	-	40630817	40680397	ENSRNOT00000080418	24	3140	ENSRNOG00000001350	Naa25	0.330437	0.003642	1.02801	0.005349	0.02533	0.000138	0.019273	0.003346	0.015539	-4.46935	0.00109757
ENSRNOT00000080035	13	-	47958645	47979797	ENSRNOT00000080035	5	1249	ENSRNOG00000005342	Rassf5	2.29559	1.87659	5.10832	1.08018	0.616279	0.987423	0.776761	1.11294	0.702429	-1.47544	0.00110448
ENSRNOT00000086458	4	+	101909389	101910097	ENSRNOT00000086458	2	345	ENSRNOG00000059176	AABR07060963.2	0.758035	0.963243	0.291778	1.3399	0.238067	0.169024	0.061648	0.057816	0.33255	-2.14035	0.00110449
ENSRNOT00000081922	1	-	98512625	98521551	ENSRNOT00000081922	11	2965	ENSRNOG00000037339	Siglec10	0.933633	0.798695	2.55782	0.326644	0.082333	0.16973	0.016424	0	0.101864	-3.78441	0.00111319
ENSRNOT00000093731	11	-	60171238	60180118	ENSRNOT00000093731	5	1356	ENSRNOG00000022110	Gcsam	4.5972	6.33823	12.6738	1.43353	1.31704	1.97914	1.50211	1.98223	1.33786	-1.80211	0.00112285
ENSRNOT00000026010	9	-	103117506	103207190	ENSRNOT00000026010	5	1600	ENSRNOG00000019128	St8sia4	3.62018	2.64431	6.26796	2.87981	1.44753	2.02948	1.30826	2.29168	1.51427	-1.01791	0.00118191
ENSRNOT00000056198	4	+	152892388	152925928	ENSRNOT00000056198	12	2316	ENSRNOG00000010591	Kdm5a	2.79313	0.902157	2.23351	1.81441	0.622349	1.12426	0.823572	0.602764	0.76033	-1.15725	0.00120052
ENSRNOT00000043811	16	-	9194424	9430743	ENSRNOT00000043811	62	10081	ENSRNOG00000029662	Wdfy4	4.39007	2.63839	13.5358	3.09136	1.34583	2.00963	2.19033	1.28665	1.39358	-1.68744	0.00120393
ENSRNOT00000020102	1	-	17171631	17378047	ENSRNOT00000020102	5	2196	ENSRNOG00000014979	Themis	0.485317	0.448179	2.34019	0.627193	0.057418	0.36478	0.126716	0.136365	0.231895	-2.24297	0.00120419
ENSRNOT00000000697	20	-	29731816	29738506	ENSRNOT00000000697	2	5573	ENSRNOG00000000572	Chst3	1.80968	1.45279	3.90557	1.09508	0.680653	1.00629	0.745579	0.746973	0.793396	-1.22888	0.00120663
ENSRNOT00000091644	4	-	163041141	163049084	ENSRNOT00000091644	5	1629	ENSRNOG00000056783	Cd69	3.15762	2.69385	7.68354	2.03631	1.19428	1.25192	1.20775	1.56861	1.75623	-1.32538	0.00121044
ENSRNOT00000087662	7	+	141370491	141377928	ENSRNOT00000087662	8	2871	ENSRNOG00000056457	Gpd1	64.7191	14.6832	19.0127	22.1583	10.683	7.99507	10.7288	10.3768	7.70589	-1.53434	0.00121358
ENSRNOT00000000995	20	-	1876173	1878126	ENSRNOT00000000995	2	674	ENSRNOG00000000768	Ubd	15.9275	7.38768	33.1478	2.90354	0.563491	2.95993	1.24077	1.45672	4.64049	-2.61227	0.00121458
ENSRNOT00000072480	10	+	92628356	92638100	ENSRNOT00000072480	7	795	ENSRNOG00000050675	Myl4	3.25812	1.73597	1.52627	0.605781	0.337419	0.725418	0.198053	0.636278	0.385889	-1.83287	0.00122855
ENSRNOT00000006035	X	+	134979646	134994349	ENSRNOT00000006035	8	2603	ENSRNOG00000004409	Sash3	7.28836	2.83736	3.04562	3.2014	0.963441	2.35146	0.991291	1.65888	1.28705	-1.36921	0.0012624
MSTRG.8394.1	15	-	26586495	26687403	MSTRG.8394.1	8	3079	ENSRNOG00000031849	Armh4	0.894534	0.907528	2.32869	0.208029	0.140007	0.274244	0.091297	0.361786	0.211107	-2.1786	0.00130241
MSTRG.2878.2	1	+	265904687	266033107	MSTRG.2878.2	40	6360	ENSRNOG00000026048	Gbf1	0.459346	0.475262	0.924482	0.83483	0.54956	0.680061	6.40925	4.2329	4.58831	2.43379	0.00131403
ENSRNOT00000023951	5	-	58197680	58198782	ENSRNOT00000023951	4	836	ENSRNOG00000034290	Ccl21	89.1598	84.9246	213.378	52.4618	24.7215	48.9311	47.0202	37.7949	26.6769	-1.42553	0.00132374
MSTRG.11067.3	19	-	10948046	11003708	MSTRG.11067.3	24	4335	ENSRNOG00000048222	Nlrc5	1.16268	1.19016	4.25998	1.69996	0.54392	0.805365	0.495385	0.768175	0.203457	-1.73122	0.00133339
ENSRNOT00000077630	20	-	4131722	4132604	ENSRNOT00000077630	1	883	ENSRNOG00000032844	RT1-Da	2.05398	1.15618	3.83783	1.08299	0.693394	0.788966	0.324471	0.697457	0.768671	-1.47515	0.00136357
ENSRNOT00000091190	8	-	49297643	49301125	ENSRNOT00000091190	4	1274	ENSRNOG00000016069	Cd3e	3.23088	2.16907	9.96351	2.02621	0.238037	1.47692	0.839846	0.976453	1.08827	-2.0784	0.00136415
ENSRNOT00000082403	18	+	61258911	61368371	ENSRNOT00000082403	9	6201	ENSRNOG00000017116	Zfp532	0.019325	0.363729	1.14905	0.007345	0.004822	0	0	0.017595	0	-6.23548	0.00140798
MSTRG.20354.9	7	+	11784341	11786475	MSTRG.20354.9	6	789	ENSRNOG00000019247	Plekhj1	1.2127	0.905589	0.360269	1.31364	1.15565	2.78517	2.28159	3.84158	2.34485	1.50933	0.00145072
MSTRG.5703.1	12	+	2054680	2068682	MSTRG.5703.1	14	2115	ENSRNOG00000000975	Mcoln1	0.294042	4.10254	0.061286	4.56456	0.250201	0.018604	0.184733	0.217858	0.202749	-3.55597	0.00154121
ENSRNOT00000073435	11	+	82862817	82875853	ENSRNOT00000073435	23	2664	ENSRNOG00000050854	LOC108348101	0.756709	0.672738	1.20915	0.885754	0.746129	0.86625	5.76204	7.17588	4.4681	2.24964	0.00154577
ENSRNOT00000001550	1	-	219383452	219388009	ENSRNOT00000001550	6	1443	ENSRNOG00000022044	Cabp4	0.326887	0.306689	1.92443	0.210711	0	0.109351	0.033747	0.027646	0.108653	-3.43418	0.00156544
ENSRNOT00000028318	10	-	90041591	90042877	ENSRNOT00000028318	4	477	ENSRNOG00000020874	Ppy	5.5131	4.40468	2.22778	2.28412	11.5837	7.18899	5.68917	7.50868	6.83014	1.22836	0.00158391
ENSRNOT00000017053	8	+	59278262	59294003	ENSRNOT00000017053	8	1827	ENSRNOG00000012106	Dnaja4	1.91595	4.1354	5.8374	4.58577	5.91859	7.06801	7.05074	10.6486	8.59029	1.07414	0.00159772
MSTRG.21441.1	7	+	132857327	133019225	MSTRG.21441.1	51	9101	ENSRNOG00000004048	Lrrk2	3.30119	2.74184	9.7263	2.23456	1.33439	1.80606	1.49753	1.3336	1.56004	-1.4236	0.00162052
ENSRNOT00000092170	1	-	275847064	275906686	ENSRNOT00000092170	21	2646	ENSRNOG00000015124	Gpam	11.0875	0.829318	5.01352	4.38553	1.93481	0.297142	0.177773	0.478701	0.150868	-2.97345	0.00162869
ENSRNOT00000029757	15	+	48031074	48189753	ENSRNOT00000029757	38	5304	ENSRNOG00000013089	Kif13b	0.046408	0.001066	0.064824	0.037147	0.005698	0.256859	1.15959	0.780948	0.147777	3.78312	0.00162869
MSTRG.12755.6	2	-	189335249	189400330	MSTRG.12755.6	28	3857	ENSRNOG00000017990	Ubap2l	0.765911	1.96731	2.38678	2.19175	0.470319	0.627561	0.539522	1.11548	0.347897	-1.42215	0.00165202
ENSRNOT00000012699	7	-	123671028	123767797	ENSRNOT00000012699	5	6502	ENSRNOG00000009585	Tcf20	0	0.003407	0	0	1.93747	2.65953	0	0	0	9.86009	0.00167081
MSTRG.2497.2	1	-	226644200	226657408	MSTRG.2497.2	18	2248	ENSRNOG00000020704	Tkfc	0.717551	1.52846	2.07747	2.17648	4.15203	2.30109	2.95348	3.2557	3.20983	1.11328	0.00168124
ENSRNOT00000007779	4	-	170913923	170932618	ENSRNOT00000007779	6	1173	ENSRNOG00000005809	Arhgdib	27.2027	37.0762	42.0963	19.9517	7.7066	13.308	9.28905	14.3111	2.36195	-1.62082	0.00169191
ENSRNOT00000064785	13	-	55061562	55173692	ENSRNOT00000064785	33	5050	ENSRNOG00000000655	Ptprc	4.59392	5.98602	10.4077	1.09734	0	0.679483	0.344258	0.304191	0.341919	-3.91298	0.00169968
ENSRNOT00000093516	2	+	5437067	5438301	ENSRNOT00000093516	1	1235	ENSRNOG00000062285	Pou5f2	0.463011	0.64193	1.77366	1.69938	0.302183	0.229408	0.562935	0.112357	0.218694	-1.84693	0.00172386
ENSRNOT00000083964	4	-	10423139	10517848	ENSRNOT00000083964	31	3702	ENSRNOG00000028801	Gsap	2.19275	1.73494	4.69906	1.55222	1.02966	0.954438	1.17679	1.28064	0.871529	-1.11037	0.00176249
MSTRG.16447.47	4	+	68849022	69094689	MSTRG.16447.47	47	5512	ENSRNOG00000026177	Mgam	0.036742	0	0.225034	0.010046	0.510476	0.126078	8.82264	0.003482	6.95059	5.77629	0.00176267
ENSRNOT00000036156	1	+	265904687	266033107	ENSRNOT00000036156	40	6369	ENSRNOG00000026048	Gbf1	0.344371	0.522837	0.648847	0.6391	0.486425	0.572288	3.24193	3.34444	2.39312	2.0338	0.00176983
ENSRNOT00000016152	1	+	229003961	229019527	ENSRNOT00000016152	3	3191	ENSRNOG00000012067	Fam111a	42.1136	51.102	33.5524	5.96731	4.77998	15.7646	4.50758	5.82794	5.7728	-2.06361	0.00181346
ENSRNOT00000021064	7	-	132294562	132343169	ENSRNOT00000021064	10	5518	ENSRNOG00000015538	Abcd2	1.6781	0.69887	0.519855	1.0499	0.339481	0.365733	0.336351	0.491727	0.153185	-1.42045	0.00182633
ENSRNOT00000091287	10	+	13145099	13162343	ENSRNOT00000091287	13	8121	ENSRNOG00000058561	Srrm2	4.11672	2.65279	4.42103	11.8946	2.09291	1.3436	2.51945	1.47044	2.02587	-1.46116	0.00183668
ENSRNOT00000017504	6	+	137063611	137071722	ENSRNOT00000017504	5	1047	ENSRNOG00000013097	LOC691485	3.15267	0.741545	1.34897	2.02725	0.701014	0.716934	0.621381	0.804588	0.516522	-1.29623	0.00184842
ENSRNOT00000083910	10	-	29191686	29196252	ENSRNOT00000083910	4	387	ENSRNOG00000003902	Fabp6	0.647059	0.828079	1.65647	0.593427	0.225096	0.187831	0.28045	0.434375	0.463723	-1.36348	0.0018669
ENSRNOT00000020543	2	-	29056219	29121104	ENSRNOT00000020543	24	8281	ENSRNOG00000014999	Tnpo1	0.218635	0.391836	0.562736	0.450797	0.701828	1.21125	0.335481	2.02324	3.46034	2.07677	0.00189659
MSTRG.1864.1	1	-	197765644	197770669	MSTRG.1864.1	11	1158	ENSRNOG00000017429	Lat	1.57393	0.653762	1.74074	0.465226	0.352726	0.422055	0.454905	0.449207	0.280228	-1.35226	0.00190388
ENSRNOT00000003208	11	+	66878658	66923092	ENSRNOT00000003208	6	1107	ENSRNOG00000002350	Eaf2	1.85463	2.85611	5.10488	0.608029	0	0.395872	0.168093	0.355984	0.293703	-3.27354	0.00194984
MSTRG.13004.7	2	+	205516246	205543160	MSTRG.13004.7	12	1762	ENSRNOG00000061058	Csde1	0	0	0	0	0	0.744664	0	2.04861	0.325024	9.99003	0.00195839
MSTRG.13599.3	20	-	4302345	4508214	MSTRG.13599.3	41	5375	ENSRNOG00000000443	LOC103689965	6.30728	3.32518	4.24743	4.90238	1.67943	1.18821	1.88031	3.31582	2.16145	-1.06205	0.00195926
ENSRNOT00000077022	7	+	116356329	116359141	ENSRNOT00000077022	5	738	ENSRNOG00000007091	Ly6e	0.243457	1.03729	2.72474	0.318502	0.252896	0.048295	0.03219	0.017336	0	-3.74809	0.00199475
ENSRNOT00000057022	2	+	186685104	186696117	ENSRNOT00000057022	6	1965	ENSRNOG00000023068	Cd5l	1.98941	1.30799	3.64319	0.307674	0.049665	0.220804	0.161	0.050754	0.654394	-2.83215	0.00200598
ENSRNOT00000025964	1	+	214440503	214445874	ENSRNOT00000025964	11	1583	ENSRNOG00000019199	LOC100911692	1.65614	2.3168	1.51372	4.94174	12.221	9.61977	2.27583	6.93167	8.56441	1.74341	0.0020159
ENSRNOT00000086250	20	-	21934839	22004209	ENSRNOT00000086250	12	2131	ENSRNOG00000000636	Rtkn2	0.677097	0.703544	1.14628	0.682478	0.220522	0.139398	0.340768	0.420316	0.065736	-1.60878	0.00202232
ENSRNOT00000023903	2	+	209161047	209188622	ENSRNOT00000023903	10	1400	ENSRNOG00000017744	Dram2	2.66904	2.19296	7.05611	2.38627	6.2251	6.38486	6.36484	10.9974	9.38701	1.29263	0.00202831
ENSRNOT00000085482	5	-	150509040	150520884	ENSRNOT00000085482	10	2302	ENSRNOG00000050106	Rcc1	4.61926	0.544134	0.108067	0.065213	0.054748	0.04898	0.002186	0.034258	0.209337	-4.11289	0.00206028
ENSRNOT00000020032	9	-	54340652	54457753	ENSRNOT00000020032	24	2979	ENSRNOG00000014079	Stat1	0.745767	1.07127	3.44221	0.651132	0.439358	0.559586	0.284274	0.34619	0.452005	-1.66775	0.00208168
ENSRNOT00000020606	16	-	71036204	71040847	ENSRNOT00000020606	7	1154	ENSRNOG00000015052	Star	2.11535	0.579754	1.07732	0.849927	0.246984	0.614788	0.211235	0.390574	0.123065	-1.72786	0.0021227
ENSRNOT00000017108	7	-	120519481	120559347	ENSRNOT00000017108	17	3075	ENSRNOG00000012295	Pla2g6	1.60179	0.699042	1.48455	2.14202	0.093514	0.095033	0.037838	0.617536	0.369666	-2.45696	0.00217451
ENSRNOT00000016184	19	+	33083412	33084915	ENSRNOT00000016184	1	1504	ENSRNOG00000012138	Rbmxl1	0.806363	1.21753	0.362191	1.14815	0.427395	0.140596	0.2557	0.385756	0.173815	-1.54523	0.00219844
MSTRG.11578.1	19	+	52566596	52608817	MSTRG.11578.1	14	3594	ENSRNOG00000016509	Usp10	0.066181	1.18771	0.040152	0.16481	0.08211	0.031624	0.010923	0.041503	0.016148	-3.20817	0.00221233
ENSRNOT00000010024	7	-	24859050	24885775	ENSRNOT00000010024	9	2263	ENSRNOG00000007587	Tcp11l2	0.126145	0.091363	0.919549	4.72852	0.091033	0.181514	0.146333	0.160314	0.173449	-3.11853	0.0022824
ENSRNOT00000010546	6	-	96164579	96171629	ENSRNOT00000010546	5	2160	ENSRNOG00000007785	Trmt5	0.336664	0.71677	0.941871	1.03401	2.42292	1.48476	0.841509	2.45435	1.52446	1.35006	0.0023594
ENSRNOT00000018769	5	+	172364421	172365188	ENSRNOT00000018769	3	592	ENSRNOG00000013850	Hes5	2.30926	1.61948	3.96847	0.95279	0.933814	0.293244	0.904149	0.521122	0.751094	-1.54556	0.00239526
ENSRNOT00000088931	17	-	34886746	34905117	ENSRNOT00000088931	9	4803	ENSRNOG00000061070	Irf4	3.76203	3.39126	7.51063	1.91109	1.04082	1.97811	1.25121	2.07963	1.37426	-1.27989	0.00241497
ENSRNOT00000056199	8	+	117793289	117795919	ENSRNOT00000056199	4	1454	ENSRNOG00000020667	Shisa5	1.1072	0.778544	0.771239	0.577874	14.6201	0.775151	0.889802	13.726	0.832051	3.06622	0.00242435
ENSRNOT00000002028	12	+	25497104	25506300	ENSRNOT00000002028	11	2758	ENSRNOG00000001480	Ncf1	10.8378	8.55918	25.6254	4.49971	2.56266	5.92643	3.48015	3.40451	3.84439	-1.53845	0.00248039
ENSRNOT00000051064	3	+	123731539	123741339	ENSRNOT00000051064	16	2798	ENSRNOG00000021248	Cdc25b	3.37029	4.53381	2.18676	2.44062	1.1859	1.20187	1.00524	1.00293	0.181034	-1.65593	0.00248195
ENSRNOT00000088956	7	+	145068286	145112509	ENSRNOT00000088956	31	3713	ENSRNOG00000036829	Nckap1l	8.19624	6.98417	17.0684	2.87215	2.34542	3.9709	2.69617	2.92148	2.77615	-1.43114	0.00249339
ENSRNOT00000081599	7	-	59928867	59957228	ENSRNOT00000081599	10	1532	ENSRNOG00000005362	Rab3ip	0.389346	0.086489	1.12831	0.826918	0.169443	0.115711	0.195496	0.064525	0.089844	-2.08069	0.00250702
ENSRNOT00000085295	12	-	546760	576746	ENSRNOT00000085295	6	2129	ENSRNOG00000059322	N4bp2l1	0.62191	0.862608	1.69111	0.764162	0.302975	0.487002	0.211226	0.396492	0.526751	-1.20497	0.00252819
MSTRG.15260.4	3	-	113272727	113316013	MSTRG.15260.4	32	5836	ENSRNOG00000014436	Ppip5k1	0.043235	0.383936	0.002078	0.0113	0.323511	1.79058	0.62329	2.00455	1.70877	3.62084	0.00255272
MSTRG.8685.1	15	+	49010492	49055237	MSTRG.8685.1	20	2850	ENSRNOG00000018238	Nuggc	2.18369	0.911675	3.40883	0.197066	0.338897	0.606324	0.220314	0.16358	0.220316	-2.28129	0.00262572
ENSRNOT00000007999	7	-	77345646	77372398	ENSRNOT00000007999	13	4344	ENSRNOG00000005333	Azin1	0.194032	0.11429	0.200021	0.145027	0.208282	1.67986	0.333527	2.99569	0.094546	2.82264	0.00263023
ENSRNOT00000020014	1	-	94485832	94494980	ENSRNOT00000020014	12	1954	ENSRNOG00000014786	Ccne1	0.740677	0.856782	1.85925	1.05374	0.004501	0.008437	0.372403	0.009253	0.031299	-3.57237	0.00265107
ENSRNOT00000004078	13	+	50103189	50149839	ENSRNOT00000004078	20	3612	ENSRNOG00000003031	Atp2b4	1.17915	1.54384	0.339589	0.251501	0.095606	0.137891	0.395319	0.098368	0.156575	-2.1199	0.00270611
ENSRNOT00000013182	15	+	93612971	93622358	ENSRNOT00000013182	5	2565	ENSRNOG00000009919	Acod1	0.643605	0.497464	3.12879	0.133726	0	0.087325	0.009492	0	0.085141	-4.72401	0.00270641
ENSRNOT00000018999	4	-	177065168	177196180	ENSRNOT00000018999	5	1807	ENSRNOG00000014018	St8sia1	1.7974	0.939564	2.64488	1.0615	0.4658	0.846985	0.792071	0.617893	0.743923	-1.068	0.00272957
ENSRNOT00000088876	2	-	53151211	53300404	ENSRNOT00000088876	7	1569	ENSRNOG00000015654	Ghr	1.2232	0	0	1.03394	0	0	0	0	0	-9.56612	0.00274496
MSTRG.13852.1	20	+	11436267	11483085	MSTRG.13852.1	32	5592	ENSRNOG00000001216	Trpm2	1.22725	1.36227	4.73473	1.56842	0.678605	1.07515	0.720577	0.413216	0.74592	-1.45594	0.0028105
ENSRNOT00000055027	1	-	197815413	197821936	ENSRNOT00000055027	15	2512	ENSRNOG00000018311	Cd19	5.20752	0.973613	15.9721	1.32096	0.05439	0.753018	0.027005	0	0.361864	-4.44477	0.00282318
ENSRNOT00000047669	1	-	215255381	215290845	ENSRNOT00000047669	18	3041	ENSRNOG00000050994	Cttn	1.2485	0.57346	7.64071	20.1927	1.05676	0.109658	1.47097	0.805873	0.45752	-3.08301	0.00288112
ENSRNOT00000065093	7	+	12782491	12787750	ENSRNOT00000065093	6	723	ENSRNOG00000043044	Cnn2	37.6708	28.3323	67.6598	21.4212	14.4015	20.4059	16.1158	19.5868	16.1927	-1.01508	0.00288292
ENSRNOT00000001639	20	-	11777783	11815647	ENSRNOT00000001639	16	3153	ENSRNOG00000001224	Itgb2	3.92798	2.56754	5.50153	1.36438	0.758202	1.7146	1.40524	1.24465	1.12142	-1.27986	0.00288861
ENSRNOT00000005684	10	+	104320743	104343396	ENSRNOT00000005684	31	4386	ENSRNOG00000004032	Tmem94	2.55547	1.36837	3.33114	4.06061	13.3072	2.80692	12.1701	3.35643	11.5183	1.76588	0.00290512
ENSRNOT00000025880	18	-	37716143	37819097	ENSRNOT00000025880	14	2538	ENSRNOG00000018992	Dpysl3	0.525835	0.602328	0.967769	0.533245	4.74856	1.26984	3.77472	0.935236	0.661892	1.93836	0.00291581
ENSRNOT00000059078	8	+	56179816	56261194	ENSRNOT00000059078	15	3887	ENSRNOG00000025624	Arhgap20	0.013211	0.00315	1.0345	0.17994	0.00975	0.018518	0.027086	0	0.007636	-4.38498	0.00297179
ENSRNOT00000000513	20	+	4329811	4353785	ENSRNOT00000000513	30	6466	ENSRNOG00000000442	Notch4	1.63943	0.439216	1.56012	0.609649	0.277619	0.360299	0.553748	0.359607	0.329012	-1.3525	0.00297726
MSTRG.6044.5	12	-	22127393	22138382	MSTRG.6044.5	18	2214	ENSRNOG00000001402	Lrch4	2.98304	3.12563	8.22802	3.92274	1.56374	1.71863	2.69332	2.2313	1.42971	-1.09419	0.00299246
MSTRG.1325.2	1	-	141458993	141471010	MSTRG.1325.2	9	2164	ENSRNOG00000015086	Plin1	6.29448	1.51511	2.82316	4.88879	0.133503	0	0	0.418473	0.006182	-4.97422	0.00299786
ENSRNOT00000036721	4	-	152737161	152835182	ENSRNOT00000036721	20	2970	ENSRNOG00000010344	B4galnt3	0.601141	1.28678	0.879576	0.597677	0.543173	0.309157	0.231798	0.334132	0.161492	-1.28111	0.00301623
ENSRNOT00000017798	2	+	187218851	187225002	ENSRNOT00000017798	7	1564	ENSRNOG00000013294	Sh2d2a	0.473983	0.626913	1.87827	0.396723	0.151292	0.263749	0.281728	0.31229	0.309569	-1.51894	0.00304898
ENSRNOT00000037050	1	+	162549420	162662170	ENSRNOT00000037050	15	4291	ENSRNOG00000024194	Rsf1	3.69931	0.307798	4.19898	1.36906	0.073647	0.109074	0.122478	0.396314	0.857858	-2.7746	0.00305189
ENSRNOT00000013931	2	+	165601007	165629415	ENSRNOT00000013931	24	4241	ENSRNOG00000010274	Smc4	4.32023	4.13046	5.32664	2.51442	2.09322	1.1136	1.0425	1.5067	2.66407	-1.13003	0.00307395
ENSRNOT00000038811	13	+	42008842	42009738	ENSRNOT00000038811	1	897	ENSRNOG00000021586	Gpr39	0.796826	0.195432	2.46622	3.3849	0.607279	0.207112	0.321985	0.114093	0.163546	-2.41778	0.00308317
ENSRNOT00000018628	2	-	149535484	149564113	ENSRNOT00000018628	8	8208	ENSRNOG00000013917	Igsf10	1.09458	1.81582	0.452935	0.811046	3.87825	2.01719	2.13731	1.72048	2.91005	1.39861	0.00310905
ENSRNOT00000023563	1	-	197765644	197770669	ENSRNOT00000023563	12	1188	ENSRNOG00000017429	Lat	5.53267	4.02304	11.5734	2.56334	1.11497	2.71181	1.93303	2.35312	2.08392	-1.38994	0.00315624
ENSRNOT00000082012	4	+	69403735	69404129	ENSRNOT00000082012	2	306	ENSRNOG00000051999	AABR07060352.1	0.269494	0.273368	1.50016	0.523929	0.128603	0.185193	0.160178	0.195553	0.109448	-1.77024	0.00315758
ENSRNOT00000085426	3	-	48291055	48372672	ENSRNOT00000085426	27	4866	ENSRNOG00000030763	Dpp4	0.427801	0.603543	0.303965	0.414472	1.1978	0.901344	0.364669	1.20717	0.920441	1.19458	0.00324676
ENSRNOT00000009612	7	-	119760888	119768082	ENSRNOT00000009612	3	3878	ENSRNOG00000007332	Sstr3	0.260214	0.257544	1.04428	0.574965	0.193079	0.187828	0.196893	0.138805	0.223648	-1.3412	0.00325277
MSTRG.15825.1	3	-	163328459	163477746	MSTRG.15825.1	40	6485	ENSRNOG00000006952	Prex1	4.7526	3.86694	12.1469	4.67918	2.28957	2.93421	3.18761	2.57892	2.78732	-1.05436	0.00328116
ENSRNOT00000030159	10	+	84309430	84619050	ENSRNOT00000030159	13	1522	ENSRNOG00000023881	Skap1	1.50149	1.55287	4.33284	1.15681	0.236145	1.07863	0.455979	0.643082	0.726268	-1.61436	0.00329179
ENSRNOT00000064957	6	+	129609074	129661531	ENSRNOT00000064957	22	4047	ENSRNOG00000004827	Papola	0.115075	0.449726	0.346299	0.224962	17.0444	0.100812	1.79801	0.613038	0.111169	3.93882	0.00335979
ENSRNOT00000029184	10	-	70783424	70788309	ENSRNOT00000029184	4	1291	ENSRNOG00000028548	Ccl9	0.162693	0.714774	1.011	0.172662	0.049129	0.205667	0.05658	0.123603	0.120829	-2.07837	0.00336211
ENSRNOT00000039728	7	-	12318757	12326392	ENSRNOT00000039728	9	981	ENSRNOG00000024568	Ndufs7	3.56592	6.24549	26.2302	4.52303	53.8138	8.12733	38.0702	50.5075	61.1547	2.23189	0.00337444
ENSRNOT00000074734	14	-	82041616	82048251	ENSRNOT00000074734	3	3279	ENSRNOG00000049351	Nat8l	1.89948	0.061229	0.477428	1.33712	0.196035	0.188449	0.131942	0.184479	0.179689	-2.27256	0.00340655
ENSRNOT00000029315	13	+	90301006	90322457	ENSRNOT00000029315	8	2345	ENSRNOG00000038286	Slamf6	1.44794	1.00715	4.40242	0.455192	0.054094	0.505807	0.007314	0.004152	0.0231	-3.78745	0.00349366
ENSRNOT00000047754	19	+	55880561	55913598	ENSRNOT00000047754	16	2479	ENSRNOG00000015150	Spg7	1.8172	2.60678	1.87488	0.370739	5.16634	4.72202	2.76866	5.11726	4.51486	1.54291	0.0035089
ENSRNOT00000004187	X	+	9436707	9467884	ENSRNOT00000004187	9	1071	ENSRNOG00000003054	AABR07037009.1	0	0.06347	0	0.073188	1.2919	1.06781	1.122	0.289411	0.00081	4.52008	0.00352329
ENSRNOT00000005995	7	+	28412220	28485710	ENSRNOT00000005995	6	772	ENSRNOG00000004517	Igf1	0.467565	1.24568	1.09515	0.283181	0.112317	0	0	0.061345	0	-4.29203	0.00355908
MSTRG.13642.71	20	-	4892932	4934871	MSTRG.13642.71	8	1047	ENSRNOG00000039744	RT1-CE4	1.92317	1.35077	3.31385	2.59763	9.55029	7.97692	3.01892	3.49997	3.23426	1.3984	0.0036004
ENSRNOT00000082794	3	+	11254056	11271872	ENSRNOT00000082794	19	3246	ENSRNOG00000010477	Pomt1	1.72347	0.144514	0.6587	2.52323	0.420874	0.161798	0.189361	0.326424	0.130798	-2.20865	0.00364687
ENSRNOT00000028737	1	-	222254184	222272285	ENSRNOT00000028737	15	2455	ENSRNOG00000021161	Fermt3	3.25404	3.69163	11.5081	5.08681	2.61727	2.67968	2.60088	2.159	1.98431	-1.13369	0.00369023
MSTRG.16854.1	4	-	119181970	119188005	MSTRG.16854.1	5	630	ENSRNOG00000037782	Gkn3	1.82377	1.41315	1.46193	1.00133	2.96332	1.87597	4.2673	1.46433	5.34693	1.29333	0.00378233
ENSRNOT00000013778	5	+	151172206	151199745	ENSRNOT00000013778	13	2498	ENSRNOG00000009912	Fgr	2.0973	1.73385	5.10468	1.46072	0.792829	1.13734	1.17553	0.818777	1.2385	-1.17794	0.00381081
ENSRNOT00000001490	12	-	44141422	44174583	ENSRNOT00000001490	8	645	ENSRNOG00000001128	Tesc	1.94978	2.32396	2.75801	0.969759	0.567391	0.823305	1.04597	0.659984	1.19149	-1.08565	0.00384945
ENSRNOT00000092397	13	-	70258915	70321722	ENSRNOT00000092397	22	5772	ENSRNOG00000027962	Smg7	0.045966	0.03714	0.112085	0.118336	0.048349	1.66686	0.003911	1.8215	0.718897	3.57393	0.00385568
ENSRNOT00000008444	X	+	128897181	128925407	ENSRNOT00000008444	5	1207	ENSRNOG00000006263	Sh2d1a	0.415814	1.00781	2.4969	0.67533	0.171077	0.423475	0.416372	0.396119	0.306295	-1.58931	0.00390364
ENSRNOT00000074401	3	+	11629556	11641466	ENSRNOT00000074401	6	2400	ENSRNOG00000046984	St6galnac6	4.81296	11.1129	9.15715	6.06579	7.9326	18.7557	13.5279	15.5502	26.7215	1.21395	0.00391196
ENSRNOT00000074194	8	+	114916122	114920171	ENSRNOT00000074194	2	3250	ENSRNOG00000048161	Tlr9	0.592529	0.330513	1.94646	0.756168	0.179361	0.282049	0.447009	0.281091	0.190206	-1.55673	0.00392329
ENSRNOT00000066384	2	+	41157823	41464264	ENSRNOT00000066384	15	2457	ENSRNOG00000042536	Pde4d	0.030958	0.060233	0.460112	1.16332	0.058453	0.035006	0.084087	0.044382	0.069822	-2.698	0.00397003
ENSRNOT00000071432	10	+	109614965	109618807	ENSRNOT00000071432	3	995	ENSRNOG00000046076	Tspan10	0.811363	0.62009	1.99065	0.021748	0	0.066955	0	0	0	-5.76499	0.00397237
ENSRNOT00000001935	12	+	23473270	23501036	ENSRNOT00000001935	9	2806	ENSRNOG00000001425	Sh2b2	2.00587	0.914318	2.98132	1.00381	0.584288	0.90328	0.465574	0.200808	0.587076	-1.5042	0.00398117
ENSRNOT00000026711	8	+	116857684	116862423	ENSRNOT00000026711	18	2460	ENSRNOG00000019680	Mst1	1.22376	0.197581	0.172167	0.650988	0.010313	0.090011	0.03936	0.221099	0.067592	-2.577	0.00407817
ENSRNOT00000093665	X	+	11050121	11077448	ENSRNOT00000093665	9	1741	ENSRNOG00000003792	Med14	0.722024	0.300988	1.21336	1.54199	0.128634	0.304136	0.264666	0.084634	0.447408	-1.78063	0.00416122
ENSRNOT00000092639	X	-	123803103	123806736	ENSRNOT00000092639	2	2563	ENSRNOG00000052226	LOC108348144	0.489694	0.427952	0.390836	0.299539	3.64506	0.456218	3.76786	0.428438	0.551842	2.27187	0.00439162
MSTRG.10075.12	17	-	44748833	44793862	MSTRG.10075.12	3	449	ENSRNOG00000054296	Hist1h2bo	0.004828	4.44338	0	4.26524	0	0	0	0.051155	0.038457	-6.56759	0.00439225
ENSRNOT00000024272	17	-	90099025	90149894	ENSRNOT00000024272	13	3118	ENSRNOG00000017803	Apbb1ip	0.636532	0.462643	3.00814	0.947796	0.48069	0.358993	0.437353	0.222792	0.171356	-1.74899	0.0044041
ENSRNOT00000003980	19	+	25815207	25818074	ENSRNOT00000003980	4	1459	ENSRNOG00000002950	Lyl1	3.35503	2.21743	4.89261	1.44122	1.47341	1.53875	0.99646	1.36193	1.19054	-1.03592	0.00442683
ENSRNOT00000034961	6	-	125040803	125060482	ENSRNOT00000034961	12	3411	ENSRNOG00000027773	Ppp4r3a	8.79482	7.98734	9.66889	6.49428	1.67009	1.09235	0.307796	0.000163	0.04708	-3.57939	0.00463881
ENSRNOT00000082699	7	-	140270692	140290796	ENSRNOT00000082699	22	5911	ENSRNOG00000054757	Adcy6	0.008647	0.006718	20.8454	30.0984	0.002133	0.005843	0.451433	0.007674	0.680803	-5.61151	0.00469344
ENSRNOT00000075934	X	-	71165366	71168612	ENSRNOT00000075934	6	1302	ENSRNOG00000003954	Il2rg	5.29227	2.19733	10.7396	2.70127	0.718852	1.07832	1.45616	1.92831	2.4776	-1.61261	0.004694
ENSRNOT00000009578	7	+	35070284	35121346	ENSRNOT00000009578	15	2373	ENSRNOG00000006983	Nr2c1	0.481306	0.179043	0.544322	1.29648	0.182353	0.158956	0.231638	0.255748	0.089107	-1.61369	0.00472607
MSTRG.9081.1	16	-	18831049	18861693	MSTRG.9081.1	16	3293	ENSRNOG00000048622	Sin3b	0.60222	5.62761	0.856171	2.09445	0.704501	0.128915	0.341924	0.481399	0.664913	-2.1894	0.00473854
ENSRNOT00000081980	1	-	64438472	64446818	ENSRNOT00000081980	3	2850	ENSRNOG00000053450	Myadm	4.88183	4.11348	3.57779	4.90275	12.0179	5.02657	4.14169	10.1833	10.824	1.08914	0.00478521
ENSRNOT00000054910	1	+	201660042	201689526	ENSRNOT00000054910	37	3106	ENSRNOG00000020560	AABR07005821.1	2.24455	1.36074	17.607	21.8157	2.27242	2.09584	2.94358	1.3978	1.4191	-2.24275	0.00479609
MSTRG.16447.46	4	+	68849022	69094689	MSTRG.16447.46	47	5564	ENSRNOG00000026177	Mgam	0.039013	0	0.17446	0.011158	0.469251	0.29639	3.85473	0.004025	1.41464	4.59498	0.0048717
ENSRNOT00000086843	3	-	1960957	2123820	ENSRNOT00000086843	27	5082	ENSRNOG00000007242	Ehmt1	0.096687	0.299938	0.455129	0.174653	0.518176	0.3994	1.22301	0.45145	0.729459	1.51435	0.0048819
MSTRG.4806.2	10	+	104367798	104403715	MSTRG.4806.2	26	3558	ENSRNOG00000004834	Llgl2	6.02713	4.19201	7.77203	14.4813	8.86753	36.7582	8.24019	31.2526	35.5	1.71523	0.00498044
ENSRNOT00000093392	19	+	46455859	46482050	ENSRNOT00000093392	4	429	ENSRNOG00000011976	Nudt7	0	0	0.034893	0	0	0.18614	4.37827	0	3.99186	7.8952	0.00506994
ENSRNOT00000093019	13	+	34610684	34665404	ENSRNOT00000093019	15	2858	ENSRNOG00000002414	Tfcp2l1	0.043214	0.011706	0.096251	0.031918	0.468979	0.563721	0.005642	1.04272	0.025504	3.32059	0.00509918
ENSRNOT00000074384	X	+	131617798	131619728	ENSRNOT00000074384	2	1101	ENSRNOG00000049388	Prr32	2.42413	0.31091	0.190342	0.569888	0.023043	0.153651	0.088459	0.16275	0	-3.20596	0.00512952
ENSRNOT00000083256	9	-	44839960	45292047	ENSRNOT00000083256	22	4068	ENSRNOG00000018830	Aff3	1.40902	1.32323	4.11841	1.32998	0.885278	1.02067	0.901645	0.773852	0.672426	-1.11112	0.00516571
ENSRNOT00000027496	1	-	266862579	266862842	ENSRNOT00000027496	2	177	ENSRNOG00000020296	Atp5md	6.82376	5.85117	3.62215	3.96272	5.53906	9.46855	9.27508	8.96962	19.6585	1.1885	0.00516679
ENSRNOT00000036301	18	-	28436548	28438654	ENSRNOT00000036301	4	922	ENSRNOG00000022009	Mzb1	25.915	22.4137	29.4399	10.1776	5.34275	12.3303	7.1705	12.8109	8.59737	-1.11741	0.00518909
MSTRG.12636.2	2	+	185524774	186110495	MSTRG.12636.2	56	9730	ENSRNOG00000023453	Lrba	5.69125	0.091027	0.794277	0.118376	0.136683	0.078294	0.105533	0.064793	0.407842	-3.25752	0.00522645
ENSRNOT00000024527	15	+	49010492	49055237	ENSRNOT00000024527	19	2736	ENSRNOG00000018238	Nuggc	4.21073	3.50095	7.71621	1.00835	0	0.377877	0.238739	0.234069	0	-4.45859	0.00530972
ENSRNOT00000011563	6	+	109562587	109584545	ENSRNOT00000011563	3	1003	ENSRNOG00000008588	Batf	2.81212	1.98691	2.61512	1.20221	0.377055	1.58006	0.515691	0.709029	0.755699	-1.31903	0.00537585
ENSRNOT00000025732	1	+	199217016	199222851	ENSRNOT00000025732	2	2800	ENSRNOG00000039730	Orai3	0.807447	4.44026	4.04166	4.27637	1.77646	0.710003	0.309124	1.0181	0.525025	-1.82214	0.00539515
ENSRNOT00000014738	6	+	108032856	108058809	ENSRNOT00000014738	12	3295	ENSRNOG00000010985	Zfp410	1.73312	2.12402	2.03539	2.10016	10.7943	1.94276	2.71638	2.95195	9.96889	1.65445	0.0056043
ENSRNOT00000022702	15	-	42671203	42693694	ENSRNOT00000022702	12	2299	ENSRNOG00000016648	Gulo	0.480355	0.280187	1.0852	0.365351	0.231264	0.20996	0.225362	0.140785	0.269144	-1.1988	0.0056235
ENSRNOT00000019473	17	-	13799383	13812615	ENSRNOT00000019473	2	3606	ENSRNOG00000014524	S1pr3	3.19676	2.28146	6.97407	2.05857	1.07202	1.70301	1.91868	1.59341	1.23089	-1.12161	0.00564542
ENSRNOT00000049759	18	-	69738686	69784099	ENSRNOT00000049759	16	2899	ENSRNOG00000015582	Me2	0.252225	0.8336	0.61573	1.21494	16.4165	15.1093	0.295756	0.45061	0.772443	3.31761	0.00568131
ENSRNOT00000073388	18	+	55463308	55464632	ENSRNOT00000073388	1	1325	ENSRNOG00000048302	LOC100910979	0.589635	1.09251	1.73029	0.333343	0.378548	0.357798	0.156664	0.243003	0.397936	-1.45461	0.00588785
ENSRNOT00000008963	7	-	14222101	14303055	ENSRNOT00000008963	19	7037	ENSRNOG00000006770	Brd4	0.137107	0.142025	0.284337	0.300336	0.113548	2.23932	0.131406	1.2134	1.52961	2.41428	0.00598439
MSTRG.8183.1	14	-	114517839	114618303	MSTRG.8183.1	35	8586	ENSRNOG00000005434	Sptbn1	20.0382	25.3968	29.4341	29.7878	30.2537	75.1791	83.5924	20.8742	77.4315	1.27236	0.00598816
ENSRNOT00000028094	1	+	226634009	226642243	ENSRNOT00000028094	5	2686	ENSRNOG00000020702	Cyb561a3	0.690366	0.334632	2.78577	0.986278	0.33372	0.169037	0.345346	0.47978	0.345136	-1.66746	0.00600681
MSTRG.13642.10	20	-	4638229	4935487	MSTRG.13642.10	13	1887	ENSRNOG00000039744	RT1-CE4	0.015018	0	0.10597	0	0.563411	6.54811	2.28136	0	0.045865	6.11021	0.00604216
ENSRNOT00000041665	20	+	6973398	6990023	ENSRNOT00000041665	16	2770	ENSRNOG00000000528	Fgd2	0.929737	1.08035	0.812907	0.671086	0.07173	0.476899	0.319009	0.298329	0.401629	-1.35101	0.00604394
ENSRNOT00000025096	17	-	5411506	5463898	ENSRNOT00000025096	23	2539	ENSRNOG00000018417	Naa35	0.307007	1.6511	5.93398	1.06886	0.489065	0.457464	0.577559	0.617658	0.380856	-1.98713	0.00607894
ENSRNOT00000003452	13	-	77829382	77896697	ENSRNOT00000003452	22	5746	ENSRNOG00000002548	Tnn	1.09448	1.02684	4.07381	0.480155	0	0.219187	0.046555	0	0.062489	-4.51644	0.00613127
ENSRNOT00000083993	18	+	28370085	28390717	ENSRNOT00000083993	14	4541	ENSRNOG00000019875	Matr3	1.6891	1.29707	4.37775	2.87992	1.17314	1.09507	1.38888	0.947801	0.539758	-1.16208	0.00616623
ENSRNOT00000079579	1	-	277881585	277939039	ENSRNOT00000079579	7	736	ENSRNOG00000046333	AABR07007032.1	9.0008	3.48966	18.2125	3.55075	1.33624	4.89434	2.23269	1.42749	1.29934	-1.78486	0.00623122
ENSRNOT00000083787	15	+	12569235	12584094	ENSRNOT00000083787	8	1317	ENSRNOG00000007701	Thoc7	2.38637	2.61099	5.11605	1.74838	2.00602	1.20257	0.732426	0.750139	0.55086	-1.34791	0.0062642
ENSRNOT00000010579	4	+	172119331	172134607	ENSRNOT00000010579	4	950	ENSRNOG00000007743	Mgst1	58.7633	17.6781	22.103	29.2666	10.5005	11.2151	18.9993	15.0224	11.6891	-1.11304	0.00628128
ENSRNOT00000001325	12	+	2201949	2203614	ENSRNOT00000001325	3	386	ENSRNOG00000001001	Retn	3.47578	0.988159	1.26168	1.08106	0.296758	0	0	0.314053	0.117071	-3.34019	0.00636261
ENSRNOT00000086683	2	-	188521785	188528195	ENSRNOT00000086683	8	2429	ENSRNOG00000042977	Mtx1	1.01563	0.749657	1.81582	1.74663	0.739894	0.437068	0.518379	0.862075	0.363374	-1.03829	0.00636724
MSTRG.13187.3	2	+	226632888	226679438	MSTRG.13187.3	10	3069	ENSRNOG00000013737	Bcar3	0.193364	0.305706	0.1619	0.712333	1.12489	1.85781	0.721467	0.363385	0.865058	1.65434	0.00660533
ENSRNOT00000035623	14	+	38030189	38085919	ENSRNOT00000035623	15	2501	ENSRNOG00000025925	Txk	0.661703	0.969559	2.06575	0.503521	0.186553	0.457749	0.402787	0.302636	0.519063	-1.33962	0.00667248
ENSRNOT00000080013	6	+	6619081	6674554	ENSRNOT00000080013	23	5037	ENSRNOG00000030294	Eml4	2.37146	1.85762	1.83428	3.24427	3.8491	2.31073	2.43369	15.9708	14.7686	1.89727	0.00667475
MSTRG.2110.1	1	+	215628719	215662504	MSTRG.2110.1	11	1485	ENSRNOG00000020300	Lsp1	4.46605	2.59419	6.08	2.44582	0.60718	2.50916	1.55614	1.64973	0.960452	-1.28031	0.00681848
ENSRNOT00000093151	11	-	60524917	60547201	ENSRNOT00000093151	6	2112	ENSRNOG00000030246	Btla	3.84126	2.8442	10.5307	1.26019	0.081297	0.803875	0	0.293044	0.698909	-3.46126	0.00688963
ENSRNOT00000025901	17	-	70971915	71105286	ENSRNOT00000025901	18	3370	ENSRNOG00000019057	Prkcq	1.47199	1.67437	3.68507	1.00331	0.553152	1.21952	0.867841	0.675613	0.666107	-1.15363	0.00699284
ENSRNOT00000048378	6	-	138237174	138250089	ENSRNOT00000048378	7	1749	ENSRNOG00000034190	AABR07065625.1	31.0304	18.8379	5.32322	12.2891	0	2.30844	2.73095	0.525507	1.37484	-3.49266	0.0070047
ENSRNOT00000046262	10	+	66690133	66928706	ENSRNOT00000046262	57	8964	ENSRNOG00000013780	Nf1	1.03681	1.36948	1.92251	1.2513	0.97543	0.6475	0.668235	0.283866	0.367552	-1.10098	0.0070638
ENSRNOT00000018009	8	+	23014956	23026503	ENSRNOT00000018009	18	1975	ENSRNOG00000013360	Prkcsh	2.58922	2.86699	2.29363	3.58411	2.57255	9.54068	2.19058	10.7036	19.1835	1.77625	0.00707919
ENSRNOT00000009573	10	+	31813814	31848379	ENSRNOT00000009573	9	3914	ENSRNOG00000007243	Havcr1	0.455067	0.509758	1.66233	0.208187	0	0.115896	0.012151	0.005028	0.134433	-3.55758	0.00708885
ENSRNOT00000074142	6	-	125316466	125317593	ENSRNOT00000074142	1	1128	ENSRNOG00000049237	Gpr68	0.644922	0.422271	1.14308	0.328021	0.347629	0.318883	0.208347	0.184895	0.253553	-1.12077	0.00715597
MSTRG.14571.2	3	+	17648814	17867321	MSTRG.14571.2	2	371	ENSRNOG00000052953	AABR07051592.1	27.1798	67.295	46.2447	48.1431	19.1332	20.5842	10.731	33.9298	18.1564	-1.07441	0.00718952
ENSRNOT00000080682	10	+	48240127	48542292	ENSRNOT00000080682	15	7062	ENSRNOG00000002903	Specc1	0.315738	0.015475	0.05582	2.27391	0.081107	0.023785	0.050823	0.125764	0.05423	-3.14921	0.00723334
ENSRNOT00000073144	17	-	70499083	70548071	ENSRNOT00000073144	8	3311	ENSRNOG00000047647	Il2ra	0.574318	0.309082	1.60251	0.63867	0.205049	0.308538	0.306823	0.209243	0.393639	-1.29291	0.00723694
ENSRNOT00000024458	17	+	24416651	24435790	ENSRNOT00000024458	5	2119	ENSRNOG00000018092	Cd83	16.6452	15.7352	39.0465	8.08913	8.8045	9.16445	5.1825	7.76973	8.09908	-1.19805	0.00749607
MSTRG.20002.10	6	+	134958776	135074001	MSTRG.20002.10	57	11146	ENSRNOG00000006178	Dync1h1	0.008167	0.027907	0.207477	0	1.7325	0.01751	0.780445	4.25444	0.023419	4.65122	0.0075075
ENSRNOT00000036054	8	-	43315592	43336304	ENSRNOT00000036054	20	3591	ENSRNOG00000005960	RGD1311744	0.199448	0.784197	0.67125	0.214911	1.01383	1.09213	1.07186	1.31465	0.762754	1.29493	0.00751168
ENSRNOT00000091626	19	-	19265164	19287643	ENSRNOT00000091626	5	1365	ENSRNOG00000014048	Cyld	0.152004	0.125731	0.988335	2.18432	0.176241	0.234266	0.198526	0.08403	0.130059	-2.2223	0.00753407
MSTRG.6341.1	12	+	40466397	40498854	MSTRG.6341.1	13	2106	ENSRNOG00000001344	Aldh2	71.603	22.1387	17.965	25.9541	73.8031	69.5882	74.9292	79.341	60.4017	1.18434	0.00757003
ENSRNOT00000071612	18	+	55391388	55392641	ENSRNOT00000071612	1	1254	ENSRNOG00000049893	LOC100910934	2.83187	2.66049	6.41665	1.75811	1.26868	1.51559	1.36387	2.03677	1.3263	-1.03757	0.00760382
ENSRNOT00000014637	6	-	27555412	27582995	ENSRNOT00000014637	15	1920	ENSRNOG00000010800	Hadhb	0.202161	0.808908	0.294742	1.47124	0.213175	0.267221	0.234639	0.188097	0.150056	-1.58519	0.00762263
MSTRG.13512.19	20	+	3176107	3214667	MSTRG.13512.19	6	941	ENSRNOG00000000777	RT1-S3	0.277925	0.893334	1.03276	0.937373	1.25121	0.897783	2.20133	2.06099	1.74612	1.19149	0.00762721
ENSRNOT00000019304	1	-	193239040	193328371	ENSRNOT00000019304	21	3412	ENSRNOG00000013836	Arhgap17	0.630461	1.54118	1.40038	0.188733	0.022297	0.225942	0.416529	0.134587	0.110638	-2.24641	0.00769075
ENSRNOT00000007326	7	+	97559841	97695739	ENSRNOT00000007326	3	2855	ENSRNOG00000005417	Zhx2	2.30318	0.380477	3.74042	0.646903	0.554972	0.478383	0.340398	0.481128	0.559637	-1.70846	0.00770013
ENSRNOT00000085354	3	+	156642464	156662224	ENSRNOT00000085354	2	151	ENSRNOG00000047611	Top1	0.30384	0.423185	1.44429	2.05286	0.344002	0.316382	0.113387	0.357635	0.167743	-1.81237	0.00771567
ENSRNOT00000079711	10	-	82074211	82117109	ENSRNOT00000079711	29	5664	ENSRNOG00000002948	Abcc3	3.24756	7.85877	33.9929	51.8469	7.64987	3.52302	6.2685	5.84455	4.38261	-1.96756	0.00782965
ENSRNOT00000058497	13	-	89329304	89343868	ENSRNOT00000058497	8	1505	ENSRNOG00000046452	Fcgr2b	4.58873	2.67901	11.9121	1.29111	0.530098	2.04749	1.61993	1.58627	0.859672	-1.79377	0.00786158
ENSRNOT00000030692	X	+	80359555	80363168	ENSRNOT00000030692	2	2717	ENSRNOG00000023005	LOC681325	0.61353	0.644177	1.8163	0.295458	0.124532	0.384758	0.307497	0.327179	0.161521	-1.53868	0.00791145
ENSRNOT00000091283	9	+	66495840	66519788	ENSRNOT00000091283	13	1709	ENSRNOG00000016486	Nop58	0.192746	0.173195	0.018291	0.197531	0.190862	1.61752	0.23184	1.58194	0.173772	2.47108	0.00794564
ENSRNOT00000079108	3	+	8547349	8598917	ENSRNOT00000079108	55	7422	ENSRNOG00000015396	Sptan1	0.077431	0.828543	0.306867	0.271361	0.953995	0.756582	1.41771	1.41728	0.885053	1.66128	0.00798614
ENSRNOT00000005863	6	-	41799749	41870046	ENSRNOT00000005863	21	3083	ENSRNOG00000004377	Lpin1	3.3732	0.910924	3.99116	3.14422	0.955377	1.12263	1.79969	0.960722	0.854934	-1.17732	0.00799011
ENSRNOT00000076664	10	+	23661013	24049460	ENSRNOT00000076664	16	2479	ENSRNOG00000028845	Ebf1	1.29086	0.278025	0.543861	0.464401	0.209302	0.158662	0.125265	0.025466	0.003175	-2.47551	0.00807507
MSTRG.15957.6	3	+	176479335	176489925	MSTRG.15957.6	11	1469	ENSRNOG00000043150	Arfgap1	1.33249	0.61672	1.21077	1.55446	1.1901	3.28733	3.0538	1.29434	3.36844	1.18959	0.00807931
ENSRNOT00000061299	20	+	3246739	3249188	ENSRNOT00000061299	3	843	ENSRNOG00000000787	AABR07044364.1	0	1.08852	0	0.815821	0	0	0	0	0	-8.45553	0.00812879
ENSRNOT00000076857	13	+	50434886	50479657	ENSRNOT00000076857	14	3921	ENSRNOG00000028353	Sox13	0.106407	0.11239	0.255561	0.366751	0.208859	2.67917	0.1988	1.70152	0.278029	2.40018	0.00814292
ENSRNOT00000018232	17	+	9639330	9644090	ENSRNOT00000018232	5	1527	ENSRNOG00000013564	Dok3	2.6885	1.22412	4.5946	0.923083	0.578535	1.37806	0.432372	0.831941	0.550614	-1.49484	0.00817163
ENSRNOT00000073550	11	-	71634392	71695000	ENSRNOT00000073550	11	1693	ENSRNOG00000046969	AABR07034438.1	0.099642	0.073499	0.058308	0.178333	0.152548	0.053324	0.196995	1.55844	0.627889	2.43317	0.00818107
ENSRNOT00000092930	7	-	117710868	117712213	ENSRNOT00000092930	2	718	ENSRNOG00000014811	Cyhr1	0.701641	0.90143	0.773082	1.04764	0.349337	0.303109	0.549	0.116465	0.464292	-1.1219	0.00818618
ENSRNOT00000085211	13	-	103239602	103264906	ENSRNOT00000085211	20	2202	ENSRNOG00000002368	Iars2	0.081136	0.568104	6.65461	0.837507	0.091445	0.072391	0.704625	0.073292	0.06832	-3.15089	0.00819046
ENSRNOT00000019571	4	+	100465170	100474301	ENSRNOT00000019571	11	2223	ENSRNOG00000014090	Retsat	3.03782	0.689178	0.656153	0.342899	0.454628	2.47445	1.51124	26.5147	12.1561	2.98684	0.00823994
ENSRNOT00000075461	1	+	17602281	17625197	ENSRNOT00000075461	4	423	ENSRNOG00000046617	LOC103690149	0	0	0	0	0	0.554757	1.27747	0.580316	0	7.56588	0.00846854
ENSRNOT00000004637	13	-	91980114	91981432	ENSRNOT00000004637	2	405	ENSRNOG00000042990	AABR07021804.1	1.2878	0.691604	3.9634	1.17215	0.495294	0.332571	0.903792	0.689505	0.417443	-1.47418	0.00857267
ENSRNOT00000027661	16	-	21001206	21017163	ENSRNOT00000027661	9	1316	ENSRNOG00000020400	Mef2b	2.76861	1.20016	1.60302	0.025483	0	0.216411	0.004116	0	0.054917	-4.52948	0.00878439
ENSRNOT00000008360	7	+	10962330	10988137	ENSRNOT00000008360	15	1999	ENSRNOG00000006350	Tle6	0.399156	0.217911	0.217459	0.390397	1.13306	0.29622	0.646283	1.23005	0.34057	1.38609	0.00880437
ENSRNOT00000012588	4	-	179491129	179512471	ENSRNOT00000012588	4	570	ENSRNOG00000009338	Kras	0.337824	3.41967	0.165314	0.419609	7.39244	3.12785	4.33358	3.62021	6.74697	2.30554	0.00881415
ENSRNOT00000049056	15	-	60482527	60512704	ENSRNOT00000049056	5	957	ENSRNOG00000049547	Tnfsf11	0.979451	0.570572	2.0587	0.521015	0.165247	0.266671	0	0.258866	0.156286	-2.44703	0.00883675
MSTRG.20840.1	7	+	71002181	71019372	MSTRG.20840.1	29	3604	ENSRNOG00000004177	Myo1a	13.2885	13.6014	8.79848	12.1387	36.7801	12.6212	75.8414	15.6788	17.6261	1.53529	0.00884533
MSTRG.23572.6	9	-	78900113	78966264	MSTRG.23572.6	42	7221	ENSRNOG00000014288	Fn1	0.159867	0.169927	0.077407	0.000589	0.000774	1.4036	3.65296	0.180065	2.54174	4.03768	0.00884726
MSTRG.7879.1	14	-	79375187	79464770	MSTRG.7879.1	6	726	ENSRNOG00000006593	Grpel1	0	0.107273	0	1.36304	0	0	0	0.005346	0.00313	-6.67013	0.00888656
MSTRG.1858.2	1	-	196857461	196883049	MSTRG.1858.2	8	1097	ENSRNOG00000015218	Nsmce1	0.024453	0.010756	0	0.038641	4.09527	2.46757	0.007102	0	0	6.06488	0.00889299
ENSRNOT00000067942	X	-	123528491	123600890	ENSRNOT00000067942	11	2064	ENSRNOG00000043182	Sept6	8.27596	7.15867	16.163	4.01712	1.0684	3.8983	2.3742	4.14457	4.01244	-1.37844	0.00891786
ENSRNOT00000087971	9	-	15637268	15646846	ENSRNOT00000087971	7	1231	ENSRNOG00000022609	Mrps10	1.20179	0.590818	0.540527	1.17407	0.652739	4.74646	1.41361	1.93967	2.98144	1.54774	0.00893308
ENSRNOT00000086175	12	-	29933906	29952196	ENSRNOT00000086175	7	1346	ENSRNOG00000000893	Tmem248	0.255261	0.254296	0.206011	1.00049	0.462349	7.62452	0.551032	5.58602	0.183074	2.86257	0.00894315
ENSRNOT00000021690	1	+	196996581	197024166	ENSRNOT00000021690	10	2401	ENSRNOG00000015773	Il21r	2.89906	1.83151	5.83786	0.255835	0.032612	0.795447	0.476092	0.013515	0.23738	-2.97493	0.00895369
ENSRNOT00000047243	3	+	57817693	57868854	ENSRNOT00000047243	17	2803	ENSRNOG00000009781	Dync1i2	0.094413	0.173216	1.01557	0.100922	0.142115	9.49793	0.096804	8.36804	0.403024	3.56849	0.00901214
ENSRNOT00000083394	14	+	86414949	86613327	ENSRNOT00000083394	23	3375	ENSRNOG00000005130	LOC103693780	0.794624	1.54118	1.23948	1.55082	13.6477	0.901226	20.1484	0.862191	1.20342	2.65682	0.00908202
MSTRG.20419.1	7	+	13039781	13055577	MSTRG.20419.1	14	2475	ENSRNOG00000000175	Mier2	1.02507	0.483865	0.556887	0.820405	0.917206	0.687821	1.70752	1.54654	1.9187	1.04475	0.00925394
ENSRNOT00000086669	1	-	226770744	226791879	ENSRNOT00000086669	11	2283	ENSRNOG00000020872	Cd5	1.38799	0.583077	2.81456	0.685814	0.087642	0.626557	0.264351	0.255169	0.565911	-1.76998	0.00927363
MSTRG.8799.5	15	+	61069429	61467462	MSTRG.8799.5	48	7297	ENSRNOG00000053145	Vwa8	1.97074	0.083756	0.267808	11.1764	0.263955	0.237964	0.1539	0.267769	0	-4.04342	0.00929335
ENSRNOT00000006408	3	+	122114754	122152477	ENSRNOT00000006408	8	3855	ENSRNOG00000004763	Sirpa	1.45789	1.35989	2.08896	2.56267	0.919161	0.273582	1.06667	0.601251	0.981279	-1.13164	0.0093404
ENSRNOT00000059565	2	-	84361061	84436912	ENSRNOT00000059565	4	1791	ENSRNOG00000010888	Ankrd33b	0.697027	0.915849	1.46896	0.329565	0.08324	0.429888	0.266956	0.385357	0.238743	-1.46262	0.00935808
ENSRNOT00000067597	4	+	69457472	69457765	ENSRNOT00000067597	1	294	ENSRNOG00000043164	AABR07060353.2	0.615823	0.503652	1.55155	0.142278	0	0.258667	0.15128	0.099506	0.102131	-2.30764	0.00939456
ENSRNOT00000049724	8	-	13208774	13251812	ENSRNOT00000049724	19	3109	ENSRNOG00000009043	Piwil4	2.59529	0	0.205073	3.49709	0.024481	0.007721	0	0	0.10509	-5.67204	0.00946538
ENSRNOT00000039572	2	+	205553163	205560791	ENSRNOT00000039572	7	1296	ENSRNOG00000023079	Nras	0.697043	0.097704	3.3233	3.33823	0.176492	0.108748	0.644366	0.39119	0.263484	-2.37922	0.00948083
ENSRNOT00000067261	3	+	148635775	148688553	ENSRNOT00000067261	18	2516	ENSRNOG00000009406	Tm9sf4	2.98213	7.04087	2.02572	4.10364	6.96701	9.46776	7.53553	5.54834	9.10545	1.053	0.00969595
ENSRNOT00000028177	1	-	82595211	82610350	ENSRNOT00000028177	9	2632	ENSRNOG00000020743	Cyp2s1	0.883546	0.717256	2.32008	0.234445	0.231115	0.34959	0.373145	0.335393	0.35944	-1.49921	0.00973549
ENSRNOT00000071609	9	-	16793928	16795887	ENSRNOT00000071609	2	372	ENSRNOG00000049925	Cd79al	6.22244	4.95098	23.2002	2.1812	0.627778	2.71966	0.774519	0.512333	0	-3.14508	0.00986161
ENSRNOT00000078672	6	-	143194515	143195445	ENSRNOT00000078672	2	300	ENSRNOG00000055375	AABR07065837.1	0.014176	0.014032	0.043615	0.182387	0.030359	0.037227	2.38525	0.079239	0.970492	3.53642	0.0099087
MSTRG.12912.2	2	-	198360301	198389191	MSTRG.12912.2	3	1053	ENSRNOG00000047898	Hist2h2aa2	2.02406	1.74448	0.32189	0.641185	1.01062	2.07485	27.0694	1.62552	4.21258	2.70673	0.0099722
ENSRNOT00000079166	9	+	3896337	3899315	ENSRNOT00000079166	5	522	ENSRNOG00000057009	LOC103693189	0.189	0.1231	0.1888	0.24307	3.14019	0.074686	3.30509	0.191237	0.082327	2.94877	0.0103185
ENSRNOT00000010031	7	-	18627808	18634079	ENSRNOT00000010031	7	1888	ENSRNOG00000007545	Angptl4	1.5267	0.539696	0.791634	0.716758	0.242883	0.211566	0.496681	0.339616	0.047055	-1.60325	0.0103255
ENSRNOT00000018442	4	-	87088759	87111025	ENSRNOT00000018442	4	3434	ENSRNOG00000013809	Kbtbd2	3.39266	0.345983	4.00689	0.561037	0.284273	0.77638	0.709464	0.249887	0.288251	-2.01897	0.0103795
ENSRNOT00000010419	6	+	25076147	25100883	ENSRNOT00000010419	6	2107	ENSRNOG00000007744	Ehd3	13.6565	9.54267	20.5346	4.74695	5.38483	6.94082	3.80479	4.44581	5.36119	-1.07949	0.0104425
ENSRNOT00000006835	6	+	137959171	137967042	ENSRNOT00000006835	6	463	ENSRNOG00000027990	Crip1	13.8604	17.6881	9.26291	2.37175	26.0769	31.5622	26.1776	23.0101	20.7872	1.35656	0.0104952
ENSRNOT00000087620	6	+	139209936	139210367	ENSRNOT00000087620	2	348	ENSRNOG00000052619	AABR07065680.1	0.657378	2.45286	1.34333	0.957736	0.082525	0.517524	0.749441	0.423252	0.256533	-1.60363	0.0106979
ENSRNOT00000025743	9	-	101025313	101038625	ENSRNOT00000025743	5	1927	ENSRNOG00000019043	Pdcd1	0.341822	0.281729	1.03657	0.160826	0	0	0.061857	0	0	-5.0341	0.0108069
ENSRNOT00000010318	5	-	133759735	133786452	ENSRNOT00000010318	6	1836	ENSRNOG00000007775	Cmpk1	4.84274	3.7891	1.55918	2.75142	3.55832	2.57794	10.0835	27.8288	10.2173	1.86255	0.0108275
ENSRNOT00000074621	6	+	129399505	129429676	ENSRNOT00000074621	4	4090	ENSRNOG00000047300	Bdkrb2	0.114415	0.392158	0.212422	3.10333	0.103167	0.023291	0.076829	0.151224	0.315998	-2.67024	0.0109794
ENSRNOT00000017573	18	+	25163648	25222135	ENSRNOT00000017573	19	2396	ENSRNOG00000012852	Bin1	0.100275	0.102581	0.298483	0.264975	0.141552	0.23304	0.210113	1.49678	2.19997	2.31523	0.0109818
ENSRNOT00000048498	X	-	135918929	136150209	ENSRNOT00000048498	13	2978	ENSRNOG00000030622	Enox2	1.07379	0	0.02228	1.18702	0	0	0.030924	0.006214	0	-6.0556	0.0113767
MSTRG.13278.5	2	-	238156406	238253089	MSTRG.13278.5	11	2190	ENSRNOG00000011669	Gstcd	0.908057	0.43337	0.504996	0.675347	0.629173	1.81565	2.18744	2.16285	0.516931	1.33704	0.0114815
ENSRNOT00000015316	4	-	85381889	85386231	ENSRNOT00000015316	3	1108	ENSRNOG00000011250	Inmt	3.5612	1.84698	0.722241	3.81342	0.369792	1.48114	0.93108	0.611774	0.298064	-1.62948	0.0116716
ENSRNOT00000021133	3	+	155160481	155262941	ENSRNOT00000021133	11	2570	ENSRNOG00000015614	Ppp1r16b	0.668396	2.06232	1.78822	0.638747	0.414341	0.36058	0.275306	0.215613	0.872472	-1.45202	0.011688
ENSRNOT00000083287	1	+	261415191	261438539	ENSRNOT00000083287	12	5418	ENSRNOG00000014903	Zfyve27	6.21039	0.508802	6.91484	1.11789	1.0132	1.19664	0.267933	0.104988	0.7174	-2.32254	0.0117314
MSTRG.14321.1	3	+	4285388	4289166	MSTRG.14321.1	7	742	ENSRNOG00000026208	AABR07051260.1	0.032462	0.29689	0.652659	1.36933	3.13447	2.15602	0.651144	3.22514	2.44511	2.13115	0.0117956
ENSRNOT00000078351	2	+	189955836	189996029	ENSRNOT00000078351	4	898	ENSRNOG00000012008	S100a3	0.956188	1.01921	3.04996	1.14807	0.465875	0.885439	0.700894	0.723194	0.624208	-1.02641	0.0118309
ENSRNOT00000025013	19	-	29598280	29951493	ENSRNOT00000025013	23	4137	ENSRNOG00000018382	Inpp4b	0.545995	0.351915	1.41903	0.811335	0.036754	0.046714	0.061268	0.062374	0.513971	-2.26739	0.0118618
ENSRNOT00000085291	5	-	162893828	163119208	ENSRNOT00000085291	69	13472	ENSRNOG00000016443	Vps13d	0.370905	0.307534	0.402582	0.603876	0.560812	0.340433	1.36116	2.75649	0.682682	1.57185	0.0118714
MSTRG.15696.1	3	-	153842565	153893915	MSTRG.15696.1	14	2758	ENSRNOG00000055809	LOC100911769	0.169558	0.552717	0.609815	3.04264	0.26244	0.02741	0.36997	0.141257	0.022696	-2.57021	0.0121216
ENSRNOT00000028347	1	-	226848403	226887156	ENSRNOT00000028347	13	2922	ENSRNOG00000020884	Cd6	1.81574	1.50498	3.35493	0.645833	0.657161	0.692364	0.679165	1.03877	0.749502	-1.11477	0.012127
MSTRG.12846.3	2	+	196139755	196172055	MSTRG.12846.3	13	3616	ENSRNOG00000021024	Pi4kb	0.620647	4.58747	4.59977	0.714517	0.446833	0	0.130404	0.241547	0.463765	-3.20741	0.0122057
MSTRG.16096.18	4	+	14143389	14235210	MSTRG.16096.18	11	1470	ENSRNOG00000040108	RGD1565355	0.519837	2.31486	1.63627	0.550135	0.57078	0.189736	0.168732	0.515423	0.055245	-1.92997	0.0122582
MSTRG.13599.4	20	-	4302345	4508214	MSTRG.13599.4	41	5375	ENSRNOG00000000443	LOC103689965	4.19854	3.62619	3.09763	5.93161	0.473361	0.318751	0.589068	2.91062	1.56939	-1.71098	0.0125106
ENSRNOT00000092763	13	-	26767685	26768708	ENSRNOT00000092763	1	1024	ENSRNOG00000002791	Bcl2	0.906805	1.04821	3.31103	1.57065	1.04646	0.455247	0.65642	0.341533	0.728825	-1.2396	0.0127394
ENSRNOT00000005124	19	-	24584455	24614019	ENSRNOT00000005124	4	1692	ENSRNOG00000003853	Scoc	2.07366	2.3107	1.25295	0.803098	6.0801	4.60458	2.39467	1.27136	4.61523	1.36236	0.0128118
ENSRNOT00000051363	16	+	72216326	72228098	ENSRNOT00000051363	10	1224	ENSRNOG00000031189	Ido1	0.508169	0.522933	2.25283	0.258256	0	0.077715	0.019561	0	0.212549	-3.65684	0.012838
ENSRNOT00000016389	6	-	111456187	111477090	ENSRNOT00000016389	6	4111	ENSRNOG00000012264	Alkbh1	0.020544	0.001345	6.46639	3.34605	0.203237	0.00188	0.161465	0.164663	0.000559	-4.33812	0.0128553
ENSRNOT00000030251	12	-	37686478	37688743	ENSRNOT00000030251	2	546	ENSRNOG00000001073	RGD1563482	0.176534	0.366212	0.926427	0.262223	0.466545	0.840878	1.19462	0.867414	2.56005	1.59666	0.0128829
ENSRNOT00000075985	11	+	33813043	33815418	ENSRNOT00000075985	2	1892	ENSRNOG00000047848	LOC108348130	2.90188	5.24984	5.55576	4.06557	3.18783	0.74155	1.31689	2.31655	1.64885	-1.12713	0.013183
ENSRNOT00000030273	10	+	15088935	15090839	ENSRNOT00000030273	3	354	ENSRNOG00000039350	Gng13	0.53957	0.331128	0.505169	0.314577	1.45795	0.681548	0.472751	0.662626	0.628453	1.0322	0.0132113
ENSRNOT00000032275	X	+	122507374	122690463	ENSRNOT00000032275	53	6660	ENSRNOG00000013321	Dock11	3.59836	1.04563	9.1807	0.328461	0.107666	1.66871	0.074826	0.142389	0.218869	-2.84852	0.0135323
MSTRG.6879.1	13	-	70864475	70922265	MSTRG.6879.1	29	3800	ENSRNOG00000002735	Dhx9	4.14998	4.31032	9.17227	17.844	3.07598	4.16736	3.76767	4.25282	2.16382	-1.2004	0.0138289
ENSRNOT00000019933	8	-	49106374	49109981	ENSRNOT00000019933	3	780	ENSRNOG00000014700	Ttc36	0.701551	0.641628	1.97264	1.43123	0.646647	0.643032	0.580181	0.376526	0.282538	-1.07044	0.0142724
MSTRG.20479.2	7	-	14403712	14418950	MSTRG.20479.2	17	3981	ENSRNOG00000006167	Rasal3	1.01127	1.62178	5.10006	0.59584	0.434307	0.948111	0.446643	0.749114	0.64035	-1.53801	0.0143133
ENSRNOT00000091265	3	-	80844033	80875817	ENSRNOT00000091265	31	3327	ENSRNOG00000017737	Dgkz	7.12895	8.69654	16.1967	10.6005	2.14499	7.12907	2.13792	6.61376	3.32952	-1.17923	0.0143254
ENSRNOT00000009893	3	-	5811504	5976244	ENSRNOT00000009893	28	5164	ENSRNOG00000007422	Vav2	1.86587	1.48545	4.23797	1.13842	0.764938	1.23765	0.784003	0.858883	1.1959	-1.02066	0.0143289
ENSRNOT00000013329	15	+	103344476	103368035	ENSRNOT00000013329	9	1808	ENSRNOG00000009766	Gpr180	1.0661	1.35095	0.365226	0.289074	3.72735	3.38112	0.506445	2.4122	1.65253	1.71427	0.0144267
MSTRG.1651.2	1	-	174948172	175420170	MSTRG.1651.2	41	7326	ENSRNOG00000009812	Sbf2	0.003015	0.007441	0.009122	0.12993	0.954907	0.037481	0.002995	0.008928	1.62454	3.979	0.0144708
ENSRNOT00000066826	17	+	81798756	82017481	ENSRNOT00000066826	13	1812	ENSRNOG00000018378	Cacnb2	0.00311	0.03319	0.006145	0	0	0.250229	1.26463	0.004136	0.007024	4.78107	0.0145428
ENSRNOT00000088323	7	-	140270692	140291620	ENSRNOT00000088323	22	5878	ENSRNOG00000054757	Adcy6	3.43614	3.0543	3.0834	4.27009	5.86599	4.79624	4.54135	4.18045	17.2509	1.22719	0.014581
ENSRNOT00000061014	9	+	18564927	18773092	ENSRNOT00000061014	9	5641	ENSRNOG00000020193	Runx2	0.391429	0.32705	1.46609	0.704801	0.261902	0.370639	0.376612	0.220772	0.194398	-1.18345	0.0146225
MSTRG.2131.1	1	-	214015060	214454058	MSTRG.2131.1	3	521	ENSRNOG00000048562	AC109542.1	0.798055	0	0.001425	0.673709	7.27468	22.9762	0.012266	0.03754	9.27468	4.5287	0.0146569
ENSRNOT00000089135	7	+	118685022	118694015	ENSRNOT00000089135	4	1511	ENSRNOG00000042771	Apol3	0.057931	0.110244	0.037646	0.0058	0.372374	0.931064	1.1275	0.09345	0	3.28427	0.0147855
ENSRNOT00000056238	10	-	112564256	112565146	ENSRNOT00000056238	1	891	ENSRNOG00000037220	AABR07031089.1	6.20516	0.71185	0.690838	6.39133	9.6828	14.6773	11.1677	9.10829	10.0303	1.77723	0.0148065
ENSRNOT00000087230	20	+	47596575	47686862	ENSRNOT00000087230	8	2203	ENSRNOG00000026110	Scml4	0.259679	0.29462	1.22147	0.340625	0.058857	0.15737	0.093241	0	0.105128	-2.50242	0.0149248
MSTRG.24127.19	X	+	21589909	21603330	MSTRG.24127.19	17	3082	ENSRNOG00000061262	Huwe1	5.04074	4.54733	8.20633	9.80922	2.72573	1.44328	5.06889	3.76376	2.21572	-1.03617	0.0149605
ENSRNOT00000080829	6	-	126450311	126582134	ENSRNOT00000080829	11	1689	ENSRNOG00000008051	Itpk1	4.38756	0.860311	5.41048	1.00374	6.75258	7.44961	8.07936	5.73162	6.82465	1.4093	0.0150745
ENSRNOT00000057384	1	+	83003841	83010171	ENSRNOT00000057384	3	731	ENSRNOG00000046222	Ceacam4	0.758243	1.68287	1.54225	0.418044	0.58989	0.469897	0.315354	0.493021	0.469872	-1.10155	0.0151867
ENSRNOT00000054809	1	-	226848403	226887156	ENSRNOT00000054809	10	3426	ENSRNOG00000020884	Cd6	0.26465	0.137634	1.13308	0.529667	0.042842	0.163314	0.287513	0.112788	0.082926	-1.74269	0.0153095
ENSRNOT00000070923	6	-	143065206	143065639	ENSRNOT00000070923	2	351	ENSRNOG00000049315	AABR07065827.1	0.114742	0.039208	0.272966	0.297032	0.558522	1.73447	0.130235	0.278514	0.558197	1.99273	0.0153774
ENSRNOT00000052270	20	+	5374985	5378539	ENSRNOT00000052270	8	1589	ENSRNOG00000030712	RT1-A2	0.34134	2.07822	2.20402	1.16485	0.787093	27.387	4.81364	3.70883	1.20851	2.5065	0.015713
MSTRG.5416.1	11	+	71872825	71889887	MSTRG.5416.1	3	2417	ENSRNOG00000001752	Nrros	1.28565	1.72125	3.57093	1.7965	1.6106	0.948165	0.677288	0.860093	0.599973	-1.00442	0.0159004
MSTRG.6283.2	12	+	38345420	38452649	MSTRG.6283.2	25	5922	ENSRNOG00000001247	Clip1	1.86974	7.61383	6.62631	6.45042	2.21061	2.51329	1.27504	3.58692	2.1602	-1.12931	0.0159349
ENSRNOT00000014562	2	-	142674345	142686577	ENSRNOT00000014562	7	2014	ENSRNOG00000010843	Nhlrc3	2.59206	1.57222	3.13634	1.89584	5.73987	4.83076	1.27168	6.30164	4.62054	1.13163	0.0159636
ENSRNOT00000040060	1	-	80517411	80544825	ENSRNOT00000040060	13	1668	ENSRNOG00000033235	Relb	0.13489	0.702487	1.30695	0.619407	0.0315	0.194925	0.396031	0.072865	0.048071	-2.06485	0.0160267
ENSRNOT00000000526	20	+	4020317	4026346	ENSRNOT00000000526	6	1246	ENSRNOG00000000454	RT1-DOb	3.86569	2.38743	8.97896	0.50925	0.493737	0.606248	0.697823	1.40167	1.74593	-1.83214	0.0160333
ENSRNOT00000061995	7	-	2968435	2972521	ENSRNOT00000061995	3	2075	ENSRNOG00000040281	Zc3h10	0.456643	3.20152	0.581379	4.00921	0.241501	1.08404	0.513576	0.482611	0.301624	-1.85622	0.0160538
MSTRG.18790.2	5	+	157848211	157962403	MSTRG.18790.2	106	22199	ENSRNOG00000018183	Ubr4	0.865336	0.558864	17.3518	17.7487	0.717746	0.862427	0.738509	3.8914	0.683311	-2.56336	0.0162771
ENSRNOT00000087604	3	+	79678201	79692327	ENSRNOT00000087604	11	762	ENSRNOG00000058658	Mtch2	7.37976	1.23619	15.6933	53.799	5.86833	0.865952	4.15102	2.6266	0.161312	-2.67096	0.0164566
ENSRNOT00000028125	8	+	117920944	117928195	ENSRNOT00000028125	7	1630	ENSRNOG00000020721	Nme6	0.587792	0.50602	0.370566	0.771776	1.23567	1.46828	0.4824	0.63093	1.33047	1.01398	0.0165564
ENSRNOT00000077202	5	+	168019058	168035792	ENSRNOT00000077202	8	1288	ENSRNOG00000036942	Tnfrsf9	0.223548	0.382088	1.30239	0.528574	0.137882	0	0	0.004153	0	-4.16515	0.0166251
ENSRNOT00000038509	2	-	230287296	230356919	ENSRNOT00000038509	24	4682	ENSRNOG00000023373	Sec24b	2.09293	1.51862	4.09646	6.11344	2.09476	0.714525	1.0372	1.69885	1.18773	-1.20242	0.0168678
ENSRNOT00000058852	17	-	60888017	60946426	ENSRNOT00000058852	20	1941	ENSRNOG00000018698	Wac	1.82648	1.05804	0.693096	0.770446	0.74883	0.195019	0.454957	0.503864	0.294098	-1.17196	0.0169083
ENSRNOT00000052017	4	-	150642534	150829741	ENSRNOT00000052017	45	6112	ENSRNOG00000007090	Cacna1c	0.344847	0.675136	1.52069	1.92528	0.609584	0.279577	0.253803	0.537191	0.330283	-1.31617	0.0169452
ENSRNOT00000072754	5	+	129380766	129381380	ENSRNOT00000072754	1	615	ENSRNOG00000050523	AABR07049579.2	0.643487	0.661012	2.6459	2.5772	0.407162	0.583547	0.890658	0.411577	0.66213	-1.29998	0.0169493
ENSRNOT00000018549	3	+	119776925	119779099	ENSRNOT00000018549	4	1623	ENSRNOG00000013862	Dusp2	3.48063	3.0553	6.63008	1.13912	0.696393	2.20581	1.23922	1.15	1.46224	-1.26189	0.0169788
ENSRNOT00000090318	12	-	15976688	16002788	ENSRNOT00000090318	7	2119	ENSRNOG00000024264	Amz1	2.09087	1.23597	1.52962	0.716734	0.174696	0.729245	0.166467	0.352202	0.868054	-1.46846	0.0170726
MSTRG.22128.2	8	-	58015942	58120043	MSTRG.22128.2	64	12244	ENSRNOG00000029773	Atm	5.86732	3.376	10.0018	5.29762	3.56021	3.22816	3.68506	1.81951	1.34709	-1.02005	0.017246
ENSRNOT00000024116	4	+	157554794	157563352	ENSRNOT00000024116	8	1589	ENSRNOG00000023363	Ing4	4.55062	3.34458	3.60817	0.87765	3.01343	5.68151	10.4912	5.49355	12.5212	1.39534	0.0173863
MSTRG.16042.5	4	-	7264783	7278485	MSTRG.16042.5	22	3918	ENSRNOG00000014347	Slc4a2	7.48025	7.59478	7.19468	9.68698	9.40712	11.2048	10.3706	36.6313	11.6941	1.11975	0.0173871
ENSRNOT00000051352	19	+	53629779	53646055	ENSRNOT00000051352	9	1288	ENSRNOG00000017905	Map1lc3b	0.265304	0.158817	0.155039	0.155738	1.38121	1.73494	0.177673	0.159663	0.133962	2.08423	0.0175922
ENSRNOT00000073933	17	+	76079720	76137697	ENSRNOT00000073933	4	1876	ENSRNOG00000045553	Proser2	7.32088	1.42666	6.73098	2.38873	1.97065	0.955964	2.07119	1.70223	1.7123	-1.25777	0.0175936
ENSRNOT00000093740	1	+	85437780	85460238	ENSRNOT00000093740	18	1628	ENSRNOG00000032034	Supt5h	0.153751	0.083669	0.061006	0.160596	1.89323	0.045041	0.069625	0.746797	0.174639	2.47609	0.0176957
ENSRNOT00000009283	10	-	11757682	11760620	ENSRNOT00000009283	9	1290	ENSRNOG00000006873	Dnase1	0.42056	2.60429	0.558263	0.250907	0.196834	0.372668	0.233597	0.282918	0.309446	-1.67265	0.0178337
ENSRNOT00000092068	7	-	140983342	141001993	ENSRNOT00000092068	24	2828	ENSRNOG00000056297	Fmnl3	1.13038	1.33366	5.18694	1.23591	0.517092	1.18788	0.755771	0.341524	0.942225	-1.40777	0.0179567
ENSRNOT00000078363	10	-	104739153	104739862	ENSRNOT00000078363	3	156	ENSRNOG00000054282	AABR07072203.1	0.462845	0.337796	1.29367	1.60703	0.410012	0.295934	0.401546	0.162014	0.243737	-1.35265	0.0179944
ENSRNOT00000065921	1	-	241945841	242083484	ENSRNOT00000065921	24	4672	ENSRNOG00000015030	Tjp2	1.68789	3.9266	0.226337	5.25495	0.407701	0	0.173719	0	0.113651	-4.17578	0.0180337
ENSRNOT00000083891	4	+	78378313	78384783	ENSRNOT00000083891	3	1122	ENSRNOG00000008416	Gimap5	2.42728	0.646357	6.00139	1.41905	0.280731	1.37288	0.817841	0.436486	0.10355	-1.97	0.018054
ENSRNOT00000004499	20	-	34846804	34929965	ENSRNOT00000004499	13	6104	ENSRNOG00000003281	Mcm9	0.1848	0.452179	0.266059	1.06507	0.144053	0.217255	0.248068	0.191036	0.131163	-1.26564	0.0182272
ENSRNOT00000072294	10	+	78168715	78173883	ENSRNOT00000072294	4	1101	ENSRNOG00000052096	Cox11	7.49204	0.323933	6.15128	5.18091	0.326548	2.23084	0.106359	0.281207	1.17667	-2.3863	0.0182772
MSTRG.18646.2	5	-	151904684	151978295	MSTRG.18646.2	20	8594	ENSRNOG00000006137	Arid1a	0.972055	0.821556	2.64379	0.361186	0.629465	0.080239	0.120345	0.355144	0.03188	-2.13743	0.0183362
ENSRNOT00000092415	X	-	123472761	123474154	ENSRNOT00000092415	2	1156	ENSRNOG00000012564	RGD1564541	0.537477	0.410369	1.15317	0.742437	0.336307	0.214154	0.564387	0.230052	0.180115	-1.06545	0.0184174
ENSRNOT00000000554	20	-	5458509	5466265	ENSRNOT00000000554	18	2869	ENSRNOG00000000474	Rgl2	0.922201	0.464676	0.901753	2.49433	0.627349	0.339153	0.532522	0.522623	0.398197	-1.15404	0.0184878
MSTRG.13124.1	2	-	211769897	211831889	MSTRG.13124.1	10	1413	ENSRNOG00000027540	Fam102b	1.21416	1.07872	1.89853	3.47104	4.00437	1.72124	3.20465	4.71213	4.47953	1.07111	0.0185512
ENSRNOT00000079173	4	-	113492229	113497396	ENSRNOT00000079173	2	1959	ENSRNOG00000006102	Pole4	0.861307	3.28231	1.49018	0.773006	0.729138	0.729719	0.669796	0.745241	0.380689	-1.18455	0.0185596
ENSRNOT00000043820	X	+	159158194	159172518	ENSRNOT00000043820	6	2309	ENSRNOG00000000875	Fhl1	0.188935	0.421668	0.227084	0.144231	0.220139	0.244511	1.08934	0.839674	0.611288	1.40455	0.0185604
ENSRNOT00000033739	15	-	28081004	28081465	ENSRNOT00000033739	1	462	ENSRNOG00000025597	LOC103694852	2.16622	0.138901	3.51826	0.405421	0.164742	0.466525	0.185539	0.542965	0.308404	-2.03267	0.0186404
ENSRNOT00000047593	2	+	177651241	177653288	ENSRNOT00000047593	1	2048	ENSRNOG00000034093	AABR07011951.1	3.48767	15.1778	24.7623	0.599103	0.857166	3.5829	0.810354	1.04328	3.83947	-2.29533	0.0186722
MSTRG.22712.7	8	-	116354073	116365242	MSTRG.22712.7	19	3245	ENSRNOG00000016512	Sema3b	0.214636	1.4453	0.504861	1.13086	1.12808	0.668258	1.61379	5.86091	4.79694	1.89464	0.0188278
ENSRNOT00000075268	1	+	46779860	46825830	ENSRNOT00000075268	21	1782	ENSRNOG00000046874	Snx9	0.181718	0.018036	0.040509	0.048204	0.220793	0.195591	0.026212	0.09205	1.54696	2.64349	0.0189182
ENSRNOT00000042965	14	+	114152472	114173643	ENSRNOT00000042965	7	762	ENSRNOG00000004621	Rtn4	15.4155	2.54842	2.86757	2.14326	0.934295	0.293135	2.20734	1.15281	2.37124	-1.91044	0.0189718
ENSRNOT00000048262	7	-	142273833	142300382	ENSRNOT00000048262	11	1924	ENSRNOG00000031930	Bin2	0.573664	0.137266	1.29928	0.13558	0.185565	0.116914	0.018894	0.145738	0.141418	-1.95798	0.0189812
ENSRNOT00000007724	4	-	144403358	144416116	ENSRNOT00000007724	2	1218	ENSRNOG00000005806	Oxtr	1.49372	0.637124	1.31026	0.862468	0.269533	0.118984	0.058505	0.431845	0	-2.47068	0.0190212
ENSRNOT00000071848	11	-	84919066	84931160	ENSRNOT00000071848	4	4198	ENSRNOG00000046258	B3gnt5	1.13588	8.70645	2.40037	0.375142	0.040445	0.643909	0.876162	0.350613	0.916777	-2.3789	0.0190897
MSTRG.7601.1	14	-	34132221	34177362	MSTRG.7601.1	18	3040	ENSRNOG00000002144	Exoc1	1.69475	1.04202	1.30653	1.41893	1.00622	1.93671	3.9696	6.27074	1.79799	1.26261	0.0191284
ENSRNOT00000020186	15	-	54905274	54906203	ENSRNOT00000020186	1	930	ENSRNOG00000015042	Cysltr2	1.50961	0.608655	2.51769	0.711756	0.638621	0.684734	0.509394	0.564576	0.245208	-1.18384	0.0191672
ENSRNOT00000086726	1	-	277870368	277939089	ENSRNOT00000086726	11	1143	ENSRNOG00000046333	AABR07007032.1	0.261501	0.322313	1.11765	0.463491	0.321322	0.069046	0.029804	0.213184	0.058563	-1.77833	0.01929
ENSRNOT00000064892	4	+	70828894	70830344	ENSRNOT00000064892	4	525	ENSRNOG00000014312	Trbc2	0.633224	0.93092	4.33163	0.843529	0.126639	0.901161	0.217743	0.097197	0.007953	-2.46915	0.0193975
MSTRG.13512.39	20	+	3189473	3282248	MSTRG.13512.39	5	916	ENSRNOG00000042905	RT1-T24-4	0	0.039325	0	0	0	0	4.08311	0.475859	0.587531	6.70768	0.0195578
ENSRNOT00000020762	4	+	155359921	155369671	ENSRNOT00000020762	5	1206	ENSRNOG00000015478	Aicda	6.3265	4.01285	13.5505	1.08224	0	0.796384	0	0	0.22075	-4.79877	0.0195755
ENSRNOT00000013265	8	+	111790678	111827151	ENSRNOT00000013265	24	4336	ENSRNOG00000009789	Topbp1	0.684928	0.563305	0.035125	0.614666	0.752533	0.852696	3.13206	3.96096	0.594902	2.0768	0.0195792
MSTRG.10211.2	17	+	63426347	63808464	MSTRG.10211.2	38	6341	ENSRNOG00000015288	Dip2c	0.455762	0.061676	0.254617	0.327969	0.544209	0.362681	1.71107	1.01551	0.28684	1.6487	0.0196509
MSTRG.23315.2	9	-	43356826	43515719	MSTRG.23315.2	41	7813	ENSRNOG00000017265	Tmem131	0.283439	1.36442	6.05353	0.31755	0.240113	0.315788	0.930577	0.100748	0.170792	-2.34749	0.0197468
MSTRG.14824.5	3	+	57817694	57868854	MSTRG.14824.5	18	2660	ENSRNOG00000009781	Dync1i2	0.905431	1.14713	0.824942	0.99008	1.5121	0.653878	1.17649	2.10547	11.1384	1.92193	0.0199786
MSTRG.3150.1	10	+	11590751	11721039	MSTRG.3150.1	32	10518	ENSRNOG00000005330	Crebbp	1.23901	0.137912	0.588001	0.314655	2.0262	0.932889	6.31906	2.10671	0.218364	2.15922	0.0200099
ENSRNOT00000084813	16	-	18745458	18766174	ENSRNOT00000084813	10	3593	ENSRNOG00000056001	Sftpd	0.574326	12.214	0.303778	2.37385	1.45056	0.576749	0.257007	0.64518	0.498458	-2.39797	0.0201322
ENSRNOT00000070925	20	-	18058245	18060661	ENSRNOT00000070925	3	2076	ENSRNOG00000047276	AABR07044711.1	6.45516	3.80818	3.63887	11.1809	3.20376	0.38723	2.8641	0.980995	2.2519	-1.54641	0.0202142
ENSRNOT00000012936	5	-	147750973	147761983	ENSRNOT00000012936	13	2075	ENSRNOG00000009705	Lck	0.633379	0.392556	1.54146	0.335907	0.008358	0.012531	0.006576	0.395135	0.012892	-2.89256	0.0203762
ENSRNOT00000023667	1	-	279207586	279277339	ENSRNOT00000023667	6	2982	ENSRNOG00000017438	AABR07007068.1	1.63899	0.05622	1.55086	1.37223	0.237267	0.135389	0.124063	0.111045	0.616044	-2.06888	0.0203783
ENSRNOT00000038296	10	-	74393699	74413745	ENSRNOT00000038296	10	1905	ENSRNOG00000006198	Prr11	0.416829	0.364063	1.70042	1.56526	0.485025	0.223487	0.528593	0.28616	0.282374	-1.31875	0.0204105
ENSRNOT00000044854	7	+	130296897	130298644	ENSRNOT00000044854	3	1027	ENSRNOG00000029830	Adm2	0.277924	0.374716	1.30091	0.089154	0.123352	0.24975	0.023629	0.077688	0.119125	-1.93654	0.0205021
ENSRNOT00000004218	10	+	91217079	91222840	ENSRNOT00000004218	5	1453	ENSRNOG00000021287	Hexim2	0.172002	0.101292	0.115613	0.030294	1.05701	0.314291	0.172868	0.342593	0.038488	1.98963	0.0205722
ENSRNOT00000088459	1	+	114258719	114346800	ENSRNOT00000088459	31	4118	ENSRNOG00000011945	Cyfip1	0.690598	0.754287	0.258381	0.373597	3.66844	1.30217	0.422938	3.42364	0.256013	1.92325	0.0206999
ENSRNOT00000079508	8	+	80965255	81039246	ENSRNOT00000079508	14	3445	ENSRNOG00000054889	Wdr72	0.197679	0.225809	0.58063	0.614819	1.43173	0.784356	0.718337	0.330046	0.99213	1.23095	0.0207821
ENSRNOT00000010914	7	+	31784438	31796041	ENSRNOT00000010914	3	1454	ENSRNOG00000008247	Ikbip	0.183992	0.060587	0.041523	0.171461	0.106835	0.350668	2.82845	0.006131	0.54625	2.84388	0.0209787
ENSRNOT00000079520	6	+	49529669	49536648	ENSRNOT00000079520	5	2932	ENSRNOG00000005144	Tmem18	3.44927	2.99024	3.49145	1.45779	8.5411	7.30409	2.88096	8.27935	2.31477	1.17469	0.0210729
ENSRNOT00000063938	3	+	21764377	21767300	ENSRNOT00000063938	2	2335	ENSRNOG00000042269	Gpr21	0.43211	0.339154	1.73345	1.42702	0.394022	0.421892	0.494136	0.311299	0.204621	-1.26476	0.0212516
MSTRG.21521.1	7	-	140614752	140640953	MSTRG.21521.1	4	1575	ENSRNOG00000060728	Tuba1a	26.3248	4.73817	34.0924	6.0446	0	0.879777	0	0.509498	2.97086	-4.1868	0.0212688
ENSRNOT00000075674	13	+	48679774	48705575	ENSRNOT00000075674	7	1711	ENSRNOG00000047287	Nucks1	3.88295	4.16867	3.84016	3.3815	31.3347	2.79645	2.91724	2.9378	30.3354	2.03364	0.0214287
ENSRNOT00000058725	12	-	29933906	29958050	ENSRNOT00000058725	10	1672	ENSRNOG00000000893	Tmem248	0	0.105647	0.06611	0.022336	0.092364	2.96255	0.145509	0.69154	0	4.05675	0.0214781
MSTRG.20378.3	7	+	12146642	12168399	MSTRG.20378.3	18	2550	ENSRNOG00000051499	Tcf3	0.622809	0.63019	0.70319	0.944722	0.559175	6.74391	7.54298	0.512768	0.347219	2.23682	0.0215242
ENSRNOT00000090305	9	+	61738471	61739134	ENSRNOT00000090305	3	507	ENSRNOG00000055383	AABR07067762.1	1.41469	1.24226	3.4961	3.23567	1.2579	0.943462	1.5062	0.462394	0.867805	-1.06103	0.0218004
ENSRNOT00000013400	3	+	57817693	57868854	ENSRNOT00000013400	16	2743	ENSRNOG00000009781	Dync1i2	1.08784	1.32105	0.762698	0.938133	2.63033	5.90443	1.11099	6.77301	0.306335	1.81687	0.0219156
ENSRNOT00000033978	3	-	80841005	80842916	ENSRNOT00000033978	5	721	ENSRNOG00000017560	Mdk	0	0	0	0	0	0	0	1.05193	0.198061	7.39528	0.0219644
MSTRG.16014.1	4	+	5958232	6029959	MSTRG.16014.1	3	1066	ENSRNOG00000047067	LOC100363537	5.11492	4.14505	0	0	0	0.016624	0	0.066687	0.096461	-5.85149	0.0220403
ENSRNOT00000015381	8	+	22856539	22858565	ENSRNOT00000015381	4	878	ENSRNOG00000011490	Angptl8	10.7613	2.59092	3.13178	3.92259	3.29746	1.25955	2.19819	0.82739	1.58571	-1.33771	0.0224117
MSTRG.17168.3	4	-	157239143	157252104	MSTRG.17168.3	15	2331	ENSRNOG00000014294	Ptpn6	4.09502	2.71857	6.32	1.44082	1.49202	1.52239	0.322905	1.59959	1.61934	-1.32543	0.0224728
ENSRNOT00000026428	1	+	166433109	166457505	ENSRNOT00000026428	7	1250	ENSRNOG00000019491	Stard10	3.27093	3.86041	11.2217	4.06346	5.63794	19.0314	11.4669	3.09458	56.9792	1.94268	0.0228986
MSTRG.11634.3	19	+	55983201	55998208	MSTRG.11634.3	12	1892	ENSRNOG00000015880	Dpep1	0.07125	0.014895	0.732335	0.001228	0	35.8525	0	0	58.0659	6.69091	0.0230302
ENSRNOT00000091073	4	-	82285528	82295470	ENSRNOT00000091073	2	2415	ENSRNOG00000057650	LOC100912608	0.537099	0.861917	3.45123	3.23726	0.871922	0.787308	0.636295	0.689987	0.183778	-1.51465	0.0233998
ENSRNOT00000056364	1	+	100832324	100836677	ENSRNOT00000056364	7	1923	ENSRNOG00000020148	Il4i1	1.33582	1.88211	5.04475	0.521459	0.385501	0.748346	0.001208	0.13758	0.487483	-2.47966	0.0235447
ENSRNOT00000007365	6	+	72359791	72373695	ENSRNOT00000007365	12	2418	ENSRNOG00000005286	Coch	1.1006	1.43948	1.70869	0.422719	0.699593	0.477278	0.100696	0.471521	0.177183	-1.46	0.0236407
ENSRNOT00000007604	3	+	92640752	92665644	ENSRNOT00000007604	5	882	ENSRNOG00000005479	Slc1a2	0.362321	0.209823	1.97788	0.076583	0.144979	0.089468	0.253993	0.13569	0.022048	-2.14969	0.0237401
ENSRNOT00000022778	2	-	147774767	147779013	ENSRNOT00000022778	5	2382	ENSRNOG00000043386	Commd2	2.87819	0.850294	1.56556	1.26248	3.97438	2.40339	3.50841	1.37689	4.67788	1.10248	0.023825
ENSRNOT00000015032	2	+	248723255	248727741	ENSRNOT00000015032	5	1106	ENSRNOG00000011135	Gtf2b	4.28418	5.52961	1.43757	1.09539	8.30874	8.89743	3.25778	7.88305	7.15205	1.3118	0.02399
ENSRNOT00000087556	5	-	147850275	147886615	ENSRNOT00000087556	14	4657	ENSRNOG00000000127	Kpna6	1.09254	1.75203	4.34874	19.8899	2.54434	1.3533	1.70762	0.600676	1.76601	-1.92465	0.0241417
ENSRNOT00000017360	3	-	79960301	80003032	ENSRNOT00000017360	34	5252	ENSRNOG00000012568	Madd	0.167906	0.296925	0.523133	0.123956	0.350332	1.11835	0.778562	0.289098	0.536475	1.28149	0.0241596
ENSRNOT00000036278	10	+	59360765	59496422	ENSRNOT00000036278	55	9293	ENSRNOG00000024535	Zzef1	0.366599	0.752804	0.029785	0.980635	0.388623	0.050801	11.6203	6.49217	1.02617	2.98772	0.0241633
ENSRNOT00000077246	1	-	201964207	201981229	ENSRNOT00000077246	4	1610	ENSRNOG00000025651	Ikzf5	0.76999	1.09535	1.16224	0.739082	3.68694	1.1514	0.910263	0.973508	3.33814	1.24064	0.0241966
ENSRNOT00000006777	X	-	29607075	29648403	ENSRNOT00000006777	7	2089	ENSRNOG00000004613	Gpm6b	0.624701	0.342214	0.499727	0.451016	0.402662	0.932935	0.423396	1.61022	1.32266	1.10301	0.0244194
ENSRNOT00000052035	14	-	17143040	17225389	ENSRNOT00000052035	10	1480	ENSRNOG00000002256	Art3	6.16039	1.88429	1.13162	2.05593	0.23466	0	0.340207	1.1589	0.203922	-2.73378	0.024477
ENSRNOT00000019038	3	-	176859151	176865103	ENSRNOT00000019038	8	953	ENSRNOG00000013992	Arfrp1	0.296648	0.388857	0.197941	0.184984	1.55785	0.28445	0.417462	0.460464	0.4025	1.34059	0.0247981
MSTRG.5390.6	11	-	70344797	70499194	MSTRG.5390.6	10	2145	ENSRNOG00000001792	Slc12a8	1.95352	0.951652	0.720647	1.1027	4.84574	2.7318	1.39895	1.02425	2.43843	1.20863	0.0248431
ENSRNOT00000005205	10	-	29191623	29196563	ENSRNOT00000005205	4	496	ENSRNOG00000003902	Fabp6	1.15693	0.997154	3.21254	0.350216	0.222912	0.400237	0.650798	0.609095	0.530084	-1.39659	0.0249231
ENSRNOT00000081634	16	+	37500017	37502237	ENSRNOT00000081634	1	2221	ENSRNOG00000058908	Hmgb1	2.22938	2.08742	2.04519	1.52459	1.91005	7.9452	1.30191	13.0243	2.63953	1.56581	0.0250799
ENSRNOT00000071577	6	-	142177345	142178771	ENSRNOT00000071577	3	345	ENSRNOG00000049870	AABR07065812.2	0.505358	0.692756	2.86059	0.287651	0	0.34794	0	0.117226	0.193337	-2.86127	0.0252009
ENSRNOT00000055963	10	-	70326158	70337532	ENSRNOT00000055963	5	3371	ENSRNOG00000021412	Slfn13	0.317385	0.656837	3.56374	1.28077	0.292149	0.744303	0.443046	0.453232	0.38173	-1.48793	0.0254034
ENSRNOT00000003778	14	-	18743685	18745457	ENSRNOT00000003778	4	926	ENSRNOG00000002802	Cxcl1	0.95935	0.544678	0.444436	0.473509	0.906407	0.923795	0.43876	3.27019	1.52882	1.34901	0.0255046
ENSRNOT00000015499	4	+	153217782	153322564	ENSRNOT00000015499	19	4519	ENSRNOG00000011566	Cecr2	1.47897	0.801985	2.76112	0.913592	0.261894	0.750221	0.887517	0.567234	0.711466	-1.07825	0.0256603
ENSRNOT00000067391	19	-	11307967	11308740	ENSRNOT00000067391	3	382	ENSRNOG00000043098	Mt2A	5.18222	15.8666	5.65387	8.69641	4.17525	2.95362	6.67283	2.53977	3.40702	-1.0445	0.0258436
ENSRNOT00000006519	10	+	104368247	104403724	ENSRNOT00000006519	26	3528	ENSRNOG00000004834	Llgl2	0.426561	0.045268	0.395715	0.468219	0.386425	1.57468	0.241039	1.26428	1.56132	1.73993	0.0259571
MSTRG.18754.2	5	+	156343577	156564988	MSTRG.18754.2	34	6570	ENSRNOG00000014368	Eif4g3	0.247768	0.387142	0.462208	0.305924	1.68048	0.278012	5.1773	1.03006	0.033219	2.35692	0.0260398
ENSRNOT00000043387	1	-	225926173	225952516	ENSRNOT00000043387	18	3154	ENSRNOG00000032929	Incenp	0.859608	3.33569	1.40395	1.00889	0.946262	0.619758	0.730071	0.824606	0.628772	-1.0214	0.0261224
ENSRNOT00000004127	10	-	48846728	48860902	ENSRNOT00000004127	9	753	ENSRNOG00000003086	Cenpv	0.832358	1.45997	1.22314	3.04199	6.51491	6.33331	0.871416	1.26169	9.14247	1.70122	0.0261602
ENSRNOT00000026969	18	+	30904498	30906924	ENSRNOT00000026969	1	2427	ENSRNOG00000027232	AABR07031734.2	0.486928	0.24928	1.08741	1.07027	0.348514	0.488221	0.235256	0.156782	0.195451	-1.18546	0.0262242
ENSRNOT00000018309	1	-	174350597	174378926	ENSRNOT00000018309	6	2164	ENSRNOG00000013591	Tmem9b	1.0497	0.746178	0.649277	1.579	0.885667	3.48559	0.995982	1.14589	8.21847	1.69258	0.0262297
ENSRNOT00000023348	2	-	123965021	123972356	ENSRNOT00000023348	5	441	ENSRNOG00000017376	Il21	0.702393	0.516109	2.16117	0	0.037222	0.191254	0	0	0.015185	-3.88594	0.0262707
ENSRNOT00000059448	10	+	31880918	31915247	ENSRNOT00000059448	7	1017	ENSRNOG00000038894	AABR07072096.1	0.592841	0.266379	1.09838	0.125239	0.115147	0	0.221719	0.073135	0.021912	-2.42004	0.0263664
ENSRNOT00000009515	4	+	99239115	99243351	ENSRNOT00000009515	6	1388	ENSRNOG00000007178	Cd8a	2.29682	1.99387	2.12852	0.491943	0.489617	0.760524	0.534994	0.915005	1.02051	-1.08232	0.0263688
ENSRNOT00000092846	18	+	3705916	3887148	ENSRNOT00000092846	50	6326	ENSRNOG00000011300	AABR07031193.1	0.830804	0.441928	0.527276	0.331789	3.58481	1.07628	0.206572	5.92293	0.209136	2.17628	0.0264917
MSTRG.21205.6	7	-	118156420	118228331	MSTRG.21205.6	12	1505	ENSRNOG00000004688	Rbfox2	0.298433	0.922231	0.783412	0.513992	1.2707	0.679185	1.5403	1.95248	0.630595	1.07699	0.0265724
ENSRNOT00000057199	14	+	86414976	86480156	ENSRNOT00000057199	23	3237	ENSRNOG00000005130	LOC103693780	0.090552	0.916727	0.14338	0.367398	5.03258	0.060515	6.34816	0.303443	0.3537	2.78059	0.0268552
MSTRG.18751.4	5	+	156053301	156074381	MSTRG.18751.4	24	3323	ENSRNOG00000013825	Rap1gap	0.642227	0.577715	7.27389	0.57365	14.1257	9.62957	3.39892	13.7817	2.2544	2.10696	0.0272459
MSTRG.641.2	1	+	79989019	79999358	MSTRG.641.2	15	2782	ENSRNOG00000015085	Dmpk	0.158915	0.127449	1.90264	1.61319	2.33654	5.02565	1.90989	3.84397	1.98388	1.83091	0.0274132
MSTRG.584.1	1	+	77541359	77813876	MSTRG.584.1	2	495	ENSRNOG00000033146	LOC103690015	0.24552	0.183378	0.237612	0.210752	0.154592	2.19241	0.126651	1.27855	0.213124	1.96299	0.0274378
ENSRNOT00000076946	4	+	14212925	14241272	ENSRNOT00000076946	14	2552	ENSRNOG00000005906	LOC103690020	2.11359	0.157559	1.14465	0.594648	0.355377	0.337802	0.108173	0.42999	0.303841	-1.55887	0.0274637
ENSRNOT00000048463	6	-	140485452	140485913	ENSRNOT00000048463	2	345	ENSRNOG00000050944	AABR07065768.1	1.74291	0.886855	5.70425	0.776956	0.805393	1.14014	0.285914	0.057226	0.23811	-1.99426	0.0274811
ENSRNOT00000029694	13	+	47539231	47552848	ENSRNOT00000029694	8	3060	ENSRNOG00000004393	Fcamr	0.843836	2.08684	0.055793	0.49756	0	0.151771	0.112414	0	0.076634	-3.57616	0.0275397
ENSRNOT00000036819	5	+	172469978	172475144	ENSRNOT00000036819	6	1699	ENSRNOG00000024012	Pex10	0.298556	0.32597	0.388318	0.493917	3.51823	0.573932	1.56021	0.224763	0.245893	1.84306	0.0278838
ENSRNOT00000087684	9	-	63456783	63641400	ENSRNOT00000087684	11	5981	ENSRNOG00000010188	Satb2	0.206699	0.001018	0.004078	0.004477	0.001492	0.000224	3.90326	0.00171	1.89733	4.52801	0.0279361
MSTRG.2768.3	1	+	258074860	258259752	MSTRG.2768.3	10	1956	ENSRNOG00000013241	Cyp2c24	2.74197	0.260624	2.28334	5.61892	11.9172	3.8286	5.52806	6.12558	10.6728	1.64232	0.0279391
ENSRNOT00000013878	3	+	110723481	110732060	ENSRNOT00000013878	6	4334	ENSRNOG00000010428	Bahd1	4.41963	2.874	4.59312	5.11374	1.71611	1.70349	0.273063	0.326978	2.59699	-1.53188	0.0281652
ENSRNOT00000090508	3	+	18787606	18787893	ENSRNOT00000090508	1	288	ENSRNOG00000056447	AABR07051658.1	0.672322	0.470408	0.37814	1.07056	0.103208	0.063915	0.287041	0.113477	0.518849	-1.40358	0.0286185
ENSRNOT00000027214	1	+	81643816	81650094	ENSRNOT00000027214	3	679	ENSRNOG00000050105	LOC103689942	0.815306	2.16353	1.66036	0.450059	0.67243	0.505646	0.339505	0.654827	0.55246	-1.09063	0.0286571
ENSRNOT00000048418	10	-	90250275	90265017	ENSRNOT00000048418	20	4625	ENSRNOG00000020937	Ubtf	0.746825	1.0726	4.19332	4.944	0.86212	1.19769	1.30135	0.419184	0.932222	-1.38076	0.0288259
ENSRNOT00000057833	7	+	70612103	70620789	ENSRNOT00000057833	16	2958	ENSRNOG00000006946	Arhgap9	2.52879	2.17315	4.38899	1.55892	0.044889	0.348706	1.17241	1.44623	0.457173	-1.80372	0.0289349
MSTRG.13921.4	20	+	18045421	18060381	MSTRG.13921.4	3	1176	ENSRNOG00000026519	LOC100364062	0.036463	0.001445	0	0.073242	0.050002	0	0.402188	0.001358	2.18188	4.26907	0.0293097
ENSRNOT00000022451	3	-	177196687	177201525	ENSRNOT00000022451	6	1290	ENSRNOG00000016547	Rgs19	1.94837	1.94929	3.21608	1.13185	0.382296	1.7193	0.856535	0.357079	0.796885	-1.18805	0.0293511
ENSRNOT00000017334	4	-	157222385	157230647	ENSRNOT00000017334	6	1828	ENSRNOG00000012828	Emg1	0.074257	0.604471	0.141589	1.09907	0.000786	0.009143	0.145634	0.166557	0.070383	-2.45655	0.0295661
ENSRNOT00000049394	16	+	75366929	75367906	ENSRNOT00000049394	2	406	ENSRNOG00000029462	Defal1	0.118654	0	1.31575	0	0	0	0	0	0	-6.93496	0.0300752
ENSRNOT00000029076	2	+	189423559	189442319	ENSRNOT00000029076	10	1130	ENSRNOG00000017441	Tpm3	0.245099	0.270199	1.1776	0.874214	0.133829	0.351591	0.208984	0.323558	0.072473	-1.39719	0.0301399
ENSRNOT00000030036	15	-	42827846	42898150	ENSRNOT00000030036	31	3351	ENSRNOG00000027839	Ptk2b	3.91407	1.21327	14.8484	7.91426	1.6824	2.35734	0.547724	4.04829	0.877462	-1.71225	0.0301405
ENSRNOT00000076460	15	+	36865548	36887331	ENSRNOT00000076460	10	1220	ENSRNOG00000051196	AABR07018038.1	4.6292	0.706739	5.26738	4.84075	4.46544	12.7668	15.3511	4.53828	8.29668	1.38191	0.0303253
MSTRG.13633.4	20	-	5140004	5153399	MSTRG.13633.4	29	6989	ENSRNOG00000000852	Prrc2a	5.04026	3.33559	11.4164	17.8992	2.71228	5.19757	5.17951	2.66187	3.59135	-1.13296	0.0304273
ENSRNOT00000021403	9	+	55050203	55057658	ENSRNOT00000021403	6	2278	ENSRNOG00000015416	Nabp1	3.4956	0.373323	4.0074	1.53911	0.328703	0.327946	0.676819	1.58838	0.172536	-1.77774	0.0307696
ENSRNOT00000008319	4	+	14151414	14188215	ENSRNOT00000008319	12	1419	ENSRNOG00000040108	RGD1565355	0.03314	0	0	0	0	1.69416	0	0	2.37032	6.7013	0.0309187
ENSRNOT00000029125	4	+	120671489	120771066	ENSRNOT00000029125	8	1205	ENSRNOG00000014508	Mgll	2.09774	1.44041	1.9429	2.65327	1.47135	10.9804	11.0958	1.75148	2.11168	1.55833	0.0314349
ENSRNOT00000079515	3	+	154910626	154983021	ENSRNOT00000079515	29	7871	ENSRNOG00000014836	Ralgapb	0.046593	0.015348	0.14591	1.43107	0.013902	0.114528	0.105011	0.011398	0.051561	-2.63403	0.0315399
MSTRG.1927.2	1	+	198744075	198781696	MSTRG.1927.2	31	4577	ENSRNOG00000017980	Itgal	5.12482	1.43206	7.01816	4.33737	0.236962	0.668291	0.759708	0.785231	3.60752	-1.72371	0.0316277
ENSRNOT00000001499	12	-	44942443	44962656	ENSRNOT00000001499	9	1514	ENSRNOG00000001135	Wsb2	0.43815	0.329155	0.311588	0.345875	0.862799	0.472348	1.70552	0.268242	0.441551	1.19366	0.0316588
ENSRNOT00000016699	4	-	100222106	100228809	ENSRNOT00000016699	6	1776	ENSRNOG00000012035	Rnf181	0.489728	0.997353	0.995454	2.26677	2.45523	4.99699	1.22724	4.18144	1.00281	1.35642	0.0316928
ENSRNOT00000035382	7	+	70614617	70620890	ENSRNOT00000035382	15	1784	ENSRNOG00000006946	Arhgap9	3.5575	1.92022	5.41319	1.17557	0.067529	0.046606	0.709631	0.435172	1.76692	-2.16011	0.0319305
ENSRNOT00000024420	1	-	164803574	164814651	ENSRNOT00000024420	4	2291	ENSRNOG00000018106	Neu3	0.785227	0.25894	0.334416	0.132409	1.14281	0.901282	1.22046	0.255157	0.838522	1.336	0.0320191
ENSRNOT00000044393	1	-	213908982	213921208	ENSRNOT00000044393	23	2241	ENSRNOG00000015830	Ano9	0.227356	0.176734	0.308672	0.250131	0.190405	0.550981	1.23669	0.437363	0.207462	1.25235	0.0320461
ENSRNOT00000006473	6	-	92016622	92057816	ENSRNOT00000006473	10	3264	ENSRNOG00000004857	L2hgdh	4.04572	3.10617	2.89358	2.27145	0.872737	1.01846	0.857239	0.899293	3.08216	-1.05481	0.0322532
ENSRNOT00000092078	Y	-	1217800	1238420	ENSRNOT00000092078	17	4287	ENSRNOG00000057231	Ddx3	0.467088	0.33015	0.367283	0.486052	2.33593	0.342282	2.04765	0.249693	0.52945	1.55822	0.0328261
ENSRNOT00000074374	5	-	150546430	150609352	ENSRNOT00000074374	11	3365	ENSRNOG00000046922	Phactr4	0.185673	0.005744	0.018493	0.019222	0.753353	0.087689	0.004029	1.11745	0.06057	2.92646	0.0328303
MSTRG.21637.4	7	-	143781781	143810653	MSTRG.21637.4	16	2280	ENSRNOG00000011573	Csad	4.82306	1.61411	0.875517	3.4571	1.30486	0.099207	0.650529	1.33171	0.45873	-1.67228	0.0328362
MSTRG.8810.1	15	+	61692020	61733088	MSTRG.8810.1	2	1591	ENSRNOG00000011657	Kbtbd6	0	0	0.056848	0.01233	0	0.291401	1.44379	0.024221	0.023926	4.44781	0.0328941
ENSRNOT00000058382	18	-	77203525	77322690	ENSRNOT00000058382	10	4109	ENSRNOG00000017146	Nfatc1	0.962281	0.775484	3.35596	1.18393	0.341614	0.655856	0.486089	0.023318	0.57834	-1.74863	0.0329532
MSTRG.831.2	1	+	85437816	85466848	MSTRG.831.2	33	3591	ENSRNOG00000032034	Supt5h	0.432174	0.207471	0.629306	0.648875	1.41416	0.451649	0.328491	2.26726	1.0359	1.34936	0.0335646
MSTRG.17865.2	5	+	68717532	68763850	MSTRG.17865.2	25	5284	ENSRNOG00000022325	Smc2	1.31733	1.31648	2.78377	6.10739	5.64679	4.38016	4.85262	6.32687	5.46291	1.04044	0.0338222
ENSRNOT00000079621	2	-	198112121	198120041	ENSRNOT00000079621	5	1314	ENSRNOG00000021170	Plekho1	2.49958	6.33203	0.702597	0.324869	0.444945	0.883226	1.07852	0.501438	0.583723	-1.72411	0.034464
MSTRG.14837.2	3	-	59108875	59169448	MSTRG.14837.2	4	1195	ENSRNOG00000029423	AABR07052519.1	0.874335	0.505826	0.599039	0.183248	0.67563	3.90892	0.418891	4.54502	0.234883	1.97031	0.0345487
ENSRNOT00000066199	2	+	257425679	257449568	ENSRNOT00000066199	20	3323	ENSRNOG00000043370	Fubp1	3.06387	0.608555	6.24803	3.85481	1.26246	0.856747	0.583799	1.31704	2.02676	-1.3426	0.0345797
ENSRNOT00000014627	2	-	45517789	45518502	ENSRNOT00000014627	1	714	ENSRNOG00000010992	Hspb3	0.331277	0.179361	1.07187	1.28887	0.331282	0.318279	0.134131	0.205144	0.031211	-1.64133	0.034882
ENSRNOT00000072212	2	-	37954161	38110567	ENSRNOT00000072212	42	2931	ENSRNOG00000039717	Ipo11	0.749909	0.676926	0.746162	2.88148	0.593342	0.579549	0.494571	0.417832	0.649924	-1.05956	0.0348935
ENSRNOT00000086891	16	+	71011332	71032474	ENSRNOT00000086891	17	2107	ENSRNOG00000014875	Ash2l	0.989997	1.14952	1.90275	0.488824	0.307916	0.510008	0.916774	0.324943	0.162921	-1.21167	0.035338
ENSRNOT00000031175	8	+	59344083	59352132	ENSRNOT00000031175	4	766	ENSRNOG00000023633	Crabp1	1.14773	2.49017	1.20456	0.676776	0.956187	3.85064	2.81012	3.81803	2.35518	1.10735	0.0358702
ENSRNOT00000010289	4	+	168752133	168755023	ENSRNOT00000010289	1	2891	ENSRNOG00000007830	Apold1	0.598904	0.171684	1.58838	0.114512	0.197659	0.091199	0.107823	0.324142	0.149444	-1.65546	0.0361089
ENSRNOT00000077073	1	+	99532568	99538947	ENSRNOT00000077073	4	1845	ENSRNOG00000030160	Zfp819	0.468046	0.595012	1.39775	0.56435	0.467507	0.250287	0.387886	0.11059	0.39892	-1.0698	0.0368228
ENSRNOT00000072527	X	-	158268653	158288109	ENSRNOT00000072527	7	855	ENSRNOG00000048650	Phf6	1.9549	2.05701	5.14757	1.85542	1.66476	0.723444	1.33858	0.558262	0.109884	-1.49183	0.037258
ENSRNOT00000072274	10	-	85573369	85574889	ENSRNOT00000072274	1	1521	ENSRNOG00000048187	Epop	0.582346	0.415357	1.99862	0.458175	0	0.402838	0.193271	0.118026	0.043319	-2.35371	0.0372584
ENSRNOT00000064285	10	+	67810655	67857223	ENSRNOT00000064285	14	3344	ENSRNOG00000005538	Psmd11	2.48362	13.1284	3.82205	2.81526	3.11235	2.03079	2.37127	1.0671	2.11678	-1.26534	0.0372648
ENSRNOT00000001686	12	+	16170162	16172129	ENSRNOT00000001686	5	568	ENSRNOG00000001251	Grifin	3.20207	2.3109	0.836824	3.73792	0.34899	0.127359	0	1.43078	0.193288	-2.45673	0.0373565
ENSRNOT00000087779	9	-	76632112	76768770	ENSRNOT00000087779	8	1897	ENSRNOG00000027430	Ikzf2	2.65724	1.28838	5.20395	3.67667	0.842404	0.987033	2.85111	1.18714	0.875	-1.09939	0.0375764
ENSRNOT00000083833	20	-	2667524	2678141	ENSRNOT00000083833	31	4124	ENSRNOG00000047657	C4a	9.19249	4.32489	15.1478	10.2778	6.23975	2.50529	2.82493	7.20181	2.86242	-1.01581	0.0376371
MSTRG.2623.3	1	+	243058872	243153654	MSTRG.2623.3	36	5954	ENSRNOG00000015894	Dock8	0	0.132691	0.631794	0.043516	5.38422	4.34462	0.143396	0.000812	2.77623	3.82382	0.0380188
ENSRNOT00000011219	7	-	114437361	114573900	ENSRNOT00000011219	31	3168	ENSRNOG00000007916	Ptk2	0.223355	0.129533	0.146992	0.199603	0.110536	0.633639	1.13516	0.194329	0.173975	1.48219	0.0382114
MSTRG.13142.2	2	-	219071208	219097875	MSTRG.13142.2	9	3246	ENSRNOG00000014333	Vcam1	0.869843	0.388733	4.38736	0.443301	0.477186	0.560432	0.112969	0.391525	0.560711	-1.67755	0.0391669
MSTRG.20209.3	7	-	1045250	1047570	MSTRG.20209.3	2	2207	ENSRNOG00000046183	AABR07055280.1	0.233844	0.049696	0.47641	0.643697	0.468952	0.149333	0.19065	3.63741	2.88563	2.22272	0.0391892
ENSRNOT00000077270	2	+	95008311	95040514	ENSRNOT00000077270	8	2597	ENSRNOG00000011441	Tpd52	0.497219	2.49174	0.858946	0.987893	3.24414	1.37549	1.59563	2.58315	3.47004	1.14197	0.0394015
ENSRNOT00000082528	3	+	154986059	154988952	ENSRNOT00000082528	2	243	ENSRNOG00000058375	Adig	0.215328	0.026211	0.249091	0.020673	0.055508	0.27408	0.225771	0.502885	1.29295	1.94138	0.0395339
ENSRNOT00000085465	20	-	35260324	35334430	ENSRNOT00000085465	6	741	ENSRNOG00000000800	Man1a1	0.305442	0.141635	1.21621	0.81915	0.157963	0.222207	0.39115	0.076286	0.187246	-1.40725	0.0402381
ENSRNOT00000028130	8	-	117930546	117932518	ENSRNOT00000028130	4	744	ENSRNOG00000020733	Camp	0.385042	0.344929	0.160219	0.277866	0.62971	0.419026	0.260391	0.368723	1.05581	1.03407	0.0404128
ENSRNOT00000025327	2	+	200076054	200098076	ENSRNOT00000025327	5	2651	ENSRNOG00000018673	Sec22b	5.68432	0.99692	1.56264	0.386669	3.12034	1.88002	24.1502	17.8543	0.723083	2.26268	0.0407356
ENSRNOT00000086338	4	-	103331020	103331319	ENSRNOT00000086338	1	300	ENSRNOG00000056830	AABR07061057.2	2.79202	1.90396	0.048441	0.040107	0.024372	0.18447	0.445574	0.224063	0.021806	-2.55904	0.0408496
ENSRNOT00000066303	10	-	107432506	107445522	ENSRNOT00000066303	4	2670	ENSRNOG00000003239	Cant1	6.23143	5.4284	3.90222	6.17842	6.30645	5.6047	15.1043	18.3351	4.60851	1.00286	0.0411033
MSTRG.14073.5	20	-	33099579	33224614	MSTRG.14073.5	38	7749	ENSRNOG00000000406	Ros1	0.938065	0.401263	1.44021	0.056623	2.0388	1.62289	3.80753	1.11198	1.25481	1.62037	0.0421617
ENSRNOT00000077417	9	+	2190915	2272687	ENSRNOT00000077417	12	2626	ENSRNOG00000012942	Satb1	0.151366	0.101158	1.29226	0.24935	0.08914	0.305641	0.065462	0.057179	0.073467	-1.74891	0.0428271
ENSRNOT00000045742	1	+	126961644	126974449	ENSRNOT00000045742	9	1114	ENSRNOG00000011932	Snrpa1	5.49147	4.30525	4.49257	2.51152	0.778542	2.92789	2.0187	2.91049	0.798707	-1.03147	0.0432404
ENSRNOT00000008645	4	+	168396775	168464352	ENSRNOT00000008645	4	1817	ENSRNOG00000006505	Borcs5	0.18554	0.139175	0.273389	0.081052	0.188961	0.149212	1.09578	0.1258	0.68897	1.53788	0.0433497
ENSRNOT00000004183	13	-	89296573	89306219	ENSRNOT00000004183	6	1203	ENSRNOG00000003136	Fcrla	6.10131	3.95085	19.0869	1.99225	0	1.42365	0	0	0.292074	-4.35212	0.0434572
ENSRNOT00000018640	9	-	46090019	46206605	ENSRNOT00000018640	20	4979	ENSRNOG00000013583	Tbc1d8	0.033584	0.074414	0.044791	0.171522	0.064153	0.106488	1.06125	0.06504	0.160342	1.97003	0.0435771
ENSRNOT00000011112	5	+	62718787	62750145	ENSRNOT00000011112	10	1740	ENSRNOG00000008099	Galnt12	40.9111	3.44098	3.00049	36.5688	69.4376	47.3966	54.664	50.8362	69.9703	1.61755	0.0437467
ENSRNOT00000001631	20	+	11436267	11482051	ENSRNOT00000001631	32	4555	ENSRNOG00000001216	Trpm2	0.940388	0.360398	2.0411	0.28825	0	0.024764	0.034877	0.316301	0	-3.4436	0.0438806
ENSRNOT00000016625	8	-	104589621	104593625	ENSRNOT00000016625	1	4005	ENSRNOG00000012386	Zbtb38	0.456351	0.079853	2.01732	1.89497	0.378861	0.25274	0.500529	0.271308	0.234597	-1.59351	0.043988
ENSRNOT00000072518	8	+	52751854	52763598	ENSRNOT00000072518	5	1915	ENSRNOG00000027730	Nxpe1	0.825194	0.654313	1.32372	0.2771	0.219726	0.222135	0.247578	0.694272	0.163583	-1.1719	0.0444347
MSTRG.20095.1	6	-	141487554	141488298	MSTRG.20095.1	3	398	ENSRNOG00000042197	AABR07065792.1	2.10917	1.11513	5.05041	1.02334	0.687097	1.43643	1.2496	0.654994	0.84551	-1.09157	0.0444506
ENSRNOT00000092349	2	-	187701522	187706300	ENSRNOT00000092349	4	2062	ENSRNOG00000019414	Tmem79	0.392025	0.609804	0.583698	0.576528	0.581094	1.07719	0.708133	2.4211	0.427688	1.0746	0.0445385
ENSRNOT00000060432	18	-	30972907	31071371	ENSRNOT00000060432	27	5592	ENSRNOG00000019688	Diaph1	0.380782	0.378235	1.0293	1.03088	0.639163	0.246614	0.17046	0.134223	0.129444	-1.25476	0.0448891
ENSRNOT00000084751	6	-	26130491	26135952	ENSRNOT00000084751	2	194	ENSRNOG00000025388	Mrpl33	1.25406	0.091091	0.328073	0.472987	0.313988	0.176323	0.167441	0.078444	0.111518	-1.4748	0.0453505
ENSRNOT00000074382	3	-	16999132	16999720	ENSRNOT00000074382	2	348	ENSRNOG00000047571	RGD1563231	96.946	51.1603	40.9671	78.8894	9.22053	50.9649	24.8688	33.6246	33.9169	-1.00812	0.0453551
MSTRG.20588.1	7	-	29020995	29070928	MSTRG.20588.1	10	1626	ENSRNOG00000058271	Chpt1	1.76077	0.142483	1.51644	0.842155	0.466778	0.33894	0.3672	0.167512	0.538447	-1.34156	0.0453734
ENSRNOT00000026215	1	-	214039481	214074663	ENSRNOT00000026215	13	1533	ENSRNOG00000019351	LOC100911881	0.370621	0.492804	1.90363	0.869859	3.93889	0.890697	0.547525	11.8078	0.3542	2.10024	0.0453757
ENSRNOT00000026559	9	+	17340341	17355681	ENSRNOT00000026559	7	3474	ENSRNOG00000019598	Vegfa	3.56725	4.24696	1.21109	0.821279	1.00075	1.0617	0.669118	1.16794	1.39586	-1.10351	0.0454289
ENSRNOT00000044983	10	+	108527740	108624688	ENSRNOT00000044983	72	15411	ENSRNOG00000029658	Rnf213	0.01144	0.528566	0.003618	0.044051	0.493301	0.67412	0.825946	0.515679	1.00641	2.33828	0.0457409
ENSRNOT00000005408	9	-	53084045	53097979	ENSRNOT00000005408	9	1800	ENSRNOG00000004001	Osgepl1	0.449763	0.321199	0.828339	1.33707	4.49526	0.976933	0.721121	0.411799	3.25403	1.58936	0.0459283
MSTRG.15411.1	3	+	124068669	124102240	MSTRG.15411.1	7	2227	ENSRNOG00000021255	Smox	0.73824	1.75072	1.05484	0.350108	2.61302	1.92196	2.49489	3.26095	0.483627	1.26283	0.0462071
MSTRG.18893.1	5	+	165405168	165408320	MSTRG.18893.1	7	1530	ENSRNOG00000011078	Srm	0.425998	0.380694	0.309856	0.261409	0.595212	0.181948	1.59846	0.256849	1.47403	1.38059	0.0462591
ENSRNOT00000020039	1	+	189514553	189541224	ENSRNOT00000020039	15	2555	ENSRNOG00000032246	Acsm3	0.372967	0.738272	0.217124	0.154062	0.746842	1.28853	0.474863	0.333847	1.17599	1.22366	0.0465381
MSTRG.5374.13	11	-	69013064	69260027	MSTRG.5374.13	33	7983	ENSRNOG00000002215	Mylk	1.36963	0.001278	0.004239	0.002945	1.76987	0.004975	35.1685	7.1404	0	4.78461	0.0466955
ENSRNOT00000029878	13	-	55061562	55173692	ENSRNOT00000029878	31	4801	ENSRNOG00000000655	Ptprc	0.476601	0.778182	3.70964	1.1837	0.166107	0.227565	0	0.292567	0	-3.32638	0.0467286
ENSRNOT00000045279	4	-	99503176	99546488	ENSRNOT00000045279	25	4469	ENSRNOG00000007814	Kdm3a	0.958101	0.431269	0.391846	5.43374	0.12765	0.530792	0.558267	0.263919	0.872568	-1.78996	0.0471664
MSTRG.2627.5	1	-	243107691	243109080	MSTRG.2627.5	2	1150	ENSRNOG00000030351	AABR07006627.1	5.62326	1.86495	21.4978	3.26298	3.39067	1.44838	0.038658	1.31305	2.34782	-2.0577	0.0471787
MSTRG.305.2	1	+	47972341	48025619	MSTRG.305.2	9	1318	ENSRNOG00000019189	Acat2	0.720106	13.6053	5.94151	0	0	0	0.417554	0.174491	0	-5.30871	0.0473144
ENSRNOT00000074452	4	-	82174967	82177420	ENSRNOT00000074452	2	876	ENSRNOG00000048917	Hoxa6	0	1.59175	1.04674	0.199098	0.166256	0	0.035641	0.045691	0.130678	-3.0439	0.0475247
ENSRNOT00000076987	1	-	90097334	90149991	ENSRNOT00000076987	13	5826	ENSRNOG00000021129	RGD1308428	1.94669	1.63402	1.34543	0.642859	4.20009	1.56828	1.46801	3.91963	1.62137	1.00612	0.0475441
ENSRNOT00000018837	19	+	39543242	39614625	ENSRNOT00000018837	20	2494	ENSRNOG00000012937	Wwp2	0.432885	0.404786	0.219245	0.794058	1.50365	0.189999	0.241612	12.9557	0.011698	2.80433	0.048159
MSTRG.20131.1	6	-	141915203	141915670	MSTRG.20131.1	2	388	MSTRG.20131	.	2.5051	3.13862	1.59052	0.070435	0.255882	0.153847	0.468139	0.814821	0.743962	-1.78143	0.0483539
ENSRNOT00000073589	4	+	69138525	69139130	ENSRNOT00000073589	2	366	ENSRNOG00000048468	Trbv1	1.17582	0.711109	1.65968	0.45995	0	0.487524	0.163209	0.10064	0.493788	-1.84921	0.0485302
ENSRNOT00000084552	13	-	41695183	41738658	ENSRNOT00000084552	12	2466	ENSRNOG00000003206	Actr3	25.0672	66.3864	69.5648	16.9447	10.765	8.10911	8.86454	34.3781	22.5775	-1.25924	0.0486715
ENSRNOT00000007932	7	+	135803698	135832652	ENSRNOT00000007932	12	3994	ENSRNOG00000005965	Irak4	0.631421	0.225203	0.357631	0.823587	0.517041	0.924335	1.6091	1.18901	0.480488	1.02433	0.0487192
MSTRG.13436.5	20	-	130348	157665	MSTRG.13436.5	7	1266	ENSRNOG00000050210	RT1-CE10	0.441736	1.66336	1.86374	1.18875	0.79744	2.27145	2.53402	3.27626	3.45712	1.07227	0.0487777
ENSRNOT00000057157	10	-	55642193	55642681	ENSRNOT00000057157	1	489	ENSRNOG00000037672	AC129753.1	0.644775	0.246716	0.38346	0.215755	0.309043	0.82715	0.846463	0.403959	1.07685	1.00088	0.0490212
ENSRNOT00000086409	3	+	140024043	140087672	ENSRNOT00000086409	10	4379	ENSRNOG00000010131	Rin2	1.13907	1.26445	2.23215	0.60371	0.949838	5.3823	0.594216	2.99178	6.83574	1.49863	0.0493347
ENSRNOT00000080591	5	-	172559135	172623899	ENSRNOT00000080591	7	2385	ENSRNOG00000055340	Ski	1.45988	5.40567	1.84823	2.30959	6.70664	1.7001	8.00123	4.83209	6.51181	1.13006	0.0493881
ENSRNOT00000078797	18	-	76748067	76753902	ENSRNOT00000078797	4	398	ENSRNOG00000059055	Hsbp1l1	0.834804	1.2924	0.697673	0.798111	1.96499	1.73622	0.356006	2.14299	2.42534	1.04632	0.0494702
ENSRNOT00000061790	1	+	37743147	37774015	ENSRNOT00000061790	13	2362	ENSRNOG00000017826	Mtrr	0.147575	0.705449	1.03451	0.368806	0.375565	0.181464	0.126003	0.13302	0.282021	-1.20628	0.0495

## Sheet: lncRNA.diff
transcript_name	chr	strand	start	end	transcript_biotype	num_exons	length	gene_id	gene_name	K1_FPKM	K2_FPKM	K3_FPKM	K4_FPKM	M1_FPKM	M2_FPKM	M3_FPKM	M4_FPKM	M5_FPKM	log2FoldChange	pvalue
MSTRG.6337.2	12	-	40381855	40476706	antisense	2	1267	ENSRNOG00000037815	Acad10	0.003024	0.004112	0.007505	0.00185	9.05016	0.784282	10.221	9.21096	10.5896	10.4295	1.52656e-26
ENSRNOT00000092035	12	+	21777529	21779204	lincRNA	3	1384	ENSRNOG00000061122	LOC102551683	0.613455	0.523868	0.862985	1.16712	0	0	0	0	0	-9.86504	5.11108e-23
MSTRG.96.25	1	+	11909939	11983698	antisense	4	2424	ENSRNOG00000059898	LOC100909599	0	0	0	0	35.5412	40.6596	0	0	0	27.1148	4.26844e-17
MSTRG.8688.1	15	+	48057490	48061664	intronic	2	4083	ENSRNOG00000013089	Kif13b	0	0.427405	2.59573	0	0	0	0	0	0	-25.9181	4.83964e-16
MSTRG.5385.1	11	-	70179267	70207361	sense	13	2935	ENSRNOG00000001794	Muc13	0.058959	0.066613	0.062008	0.085394	55.4216	64.6755	0.064981	16.2538	64.0053	9.32339	7.5586e-16
MSTRG.12929.6	2	+	198726134	198751979	bidirectional	2	1872	ENSRNOG00000021213	Lix1l	0	2.02309	0	2.87729	0	0	0	0	0	-25.5632	1.20267e-15
MSTRG.95.17	1	-	11903552	11973025	antisense	4	2679	ENSRNOG00000047746	AABR07000398.1	0	0	0	0	0	17.897	0	5.41003	0	25.7186	1.55624e-15
MSTRG.350.2	1	-	54191655	54209238	intergenic	2	2932	MSTRG.350	.	0	0	1.2473	1.32533	0	0	0	0	0	-25.2474	2.67593e-15
MSTRG.21576.4	7	-	142244295	142261442	sense	4	1974	ENSRNOG00000048932	Smagp	3.04822	2.91229	2.62239	3.17131	1.42152	1.26815	1.20812	1.10152	1.47105	-1.04757	4.84303e-15
ENSRNOT00000087947	5	-	153011552	153015464	lincRNA	4	2099	ENSRNOG00000057126	AABR07050134.1	0	0	0	0	2.41369	0	0	2.32093	0.068469	24.4562	3.43599e-14
MSTRG.18209.1	5	+	128063896	128102285	sense	6	3488	ENSRNOG00000052062	Tut4	0	0	0	0	1.25926	1.44171	0.014213	0	0	24.413	3.81065e-14
MSTRG.95.38	1	-	11906694	11969822	antisense	2	1400	ENSRNOG00000047746	AABR07000398.1	0	0	0	0	0.279019	0	0.96707	0	5.79089	24.373	4.19099e-14
MSTRG.19128.1	6	-	10768311	10843255	intergenic	2	745	MSTRG.19128	.	0	0	0	0	0	0	0	7.33408	9.99738	24.3246	4.6983e-14
MSTRG.17417.3	4	+	182543411	182564839	bidirectional	2	1356	ENSRNOG00000001851	Far2	0	1.77618	0	0.330992	0	0	0	0	0	-24.0042	5.69506e-14
MSTRG.24704.3	X	+	142653057	142655872	intergenic	2	2111	MSTRG.24704	.	0	0	0	0	3.63138	0	0.00268	0	0.693019	23.7696	1.73369e-13
MSTRG.7156.2	13	-	92894440	92918968	bidirectional	2	2039	ENSRNOG00000003616	Grem2	0	0	0	0	0.794543	0	0	1.95763	0	23.5766	2.7166e-13
MSTRG.5817.8	12	+	10207957	10213651	intergenic	3	473	MSTRG.5817	.	0	0	0	0	0	0	10.9969	2.39384	0	23.4536	3.60292e-13
MSTRG.1714.11	1	+	180788614	181323308	intergenic	9	1425	MSTRG.1714	.	0	0	0	0	2.46509	0	0	0	0.776778	23.4384	3.73696e-13
MSTRG.16103.1	4	-	20914454	20915341	intergenic	2	858	MSTRG.16103	.	0	0	0	0	0	2.50796	0	0	2.79238	23.3949	4.12976e-13
MSTRG.17417.5	4	+	182543423	182566318	bidirectional	3	2261	ENSRNOG00000001851	Far2	0	0	0	0	1.28074	0.005059	0	0.370237	0	23.135	7.47195e-13
MSTRG.10501.2	18	-	23603893	23604861	intergenic	2	942	MSTRG.10501	.	0	0	0	0	0	3.506	0	0.48693	0	23.1051	7.99652e-13
MSTRG.10904.1	18	-	70348522	70348848	intergenic	2	303	MSTRG.10904	.	0	0	0	0	0	9.33776	0	2.82999	0.032194	23.08	8.46392e-13
MSTRG.14929.2	3	+	68102909	68103176	intergenic	2	246	MSTRG.14929	.	0	0	0	0	5.92998	6.02386	0	0	0	22.7875	1.63549e-12
MSTRG.16104.3	4	-	20919300	21000023	intergenic	2	369	MSTRG.16104	.	0	0	0	0	0	0	1.55051	0	5.09914	22.5447	2.80849e-12
MSTRG.399.2	1	-	57672280	57690751	intergenic	3	842	MSTRG.399	.	0	0	0	0	0.365723	0	0	2.39412	0	22.4487	3.4729e-12
MSTRG.8674.1	15	-	46693383	46775764	bidirectional	2	746	ENSRNOG00000011560	Mtmr9	0	0	0	0	0.733788	0	2.28645	0	0	22.4152	3.73935e-12
ENSRNOT00000073083	7	+	1149075	1149952	pseudogene	1	878	ENSRNOG00000047893	AABR07055288.1	0.099797	0.067086	0.130633	0.099787	9.75607	10.2835	0.107716	13.6353	10.2316	6.55228	4.53599e-12
MSTRG.66.4	1	+	8644321	8661561	antisense	3	217	ENSRNOG00000011411	Adgrg6	0	0	0	0	7.6291	0	0	0	7.6319	21.7347	1.62385e-11
MSTRG.12818.1	2	+	194044677	194050631	intergenic	2	324	MSTRG.12818	.	0	0	0	0	0	3.24503	0	0.705512	0	21.6107	2.14179e-11
MSTRG.12817.3	2	-	194044490	194050631	intergenic	2	511	MSTRG.12817	.	0	0	0	0	0	2.92021	0	0.567871	0	20.7598	1.24952e-10
MSTRG.6198.3	12	+	30311393	30446161	bidirectional	3	470	ENSRNOG00000053790	AABR07036007.1	0	0	0	0	0	0	0	2.86742	0.793055	20.2078	3.799e-10
MSTRG.7721.2	14	-	45120846	45173363	bidirectional	2	12051	ENSRNOG00000002163	Klf3	2.10921	0.484578	0.000447	0.766842	0	0	0	0	0	-13.0959	4.37551e-09
MSTRG.23939.6	9	+	122033487	122084790	intergenic	2	4067	MSTRG.23939	.	0.589806	0.98472	3.71116	0.029565	0.010348	0.04042	0.004683	0.01361	0.005426	-6.24909	1.25955e-08
MSTRG.12880.1	2	+	197787106	197818690	antisense	2	8936	ENSRNOG00000049385	Adamtsl4	0.000216	0	0.000134	0.00073	0.000114	0.000216	18.4103	0.00013	20.5996	13.9114	1.43167e-08
MSTRG.1714.12	1	+	180791169	180971583	intergenic	4	464	MSTRG.1714	.	0.080071	0.498946	0.361064	0.058097	1.00375	4.02251	3.51676	3.46363	2.52001	3.61372	1.97236e-07
MSTRG.6764.5	13	-	51583407	51608931	bidirectional	2	1970	ENSRNOG00000051440	Ppp1r12b	0.029067	0.026371	0.051093	0.067165	3.82415	0.019278	0.054064	10.016	6.59468	6.6798	5.60334e-07
MSTRG.12303.1	2	-	117624502	117645055	intergenic	2	20304	MSTRG.12303	.	0.663267	0	1.55947	3.63641	0	0	0	0	0	-14.6089	8.8025e-07
MSTRG.23939.7	9	+	122079914	122084790	intergenic	2	3843	MSTRG.23939	.	0.225328	1.66528	5.87028	0	0	0.001321	0	0	0	-12.0332	1.05541e-06
MSTRG.17262.2	4	-	162421532	162439845	antisense	4	2308	ENSRNOG00000059890	Clec2d2	3.68353	3.25292	7.77733	1.0369	0.289136	0.93889	0.274626	0.228295	0.350044	-3.09467	1.86308e-06
ENSRNOT00000081524	7	+	75852610	75858812	lincRNA	4	1580	ENSRNOG00000055234	LOC102555534	0	0	0	0	0.988622	0.79695	1.1354	0	0.463432	9.96716	2.38773e-06
MSTRG.13065.1	2	-	209094983	209102540	antisense	4	4829	ENSRNOG00000017680	Dennd2d	1.85993	1.36753	4.12903	1.47704	0.511836	0.150807	0.223797	0.570492	0.378646	-2.42995	3.11831e-06
MSTRG.23290.1	9	-	42818234	42828487	intergenic	3	2699	MSTRG.23290	.	1.1284	1.11011	3.45872	0.863969	0.281245	0.465873	0.365249	0.34796	0.338492	-2.03386	4.46631e-06
MSTRG.19564.2	6	+	88057985	88060525	intergenic	2	528	MSTRG.19564	.	0	0	0	0	0.349646	6.88442	0	1.79115	3.67263	10.2844	6.98693e-06
ENSRNOT00000092808	12	+	15839918	15844512	processed_transcript	3	788	ENSRNOG00000024277	AABR07035470.1	2.66314	2.62372	8.93841	1.97725	0.871325	1.12087	0.651947	0.707152	0.596176	-2.19752	9.20483e-06
MSTRG.17256.1	4	+	162187443	162248514	antisense	4	1754	ENSRNOG00000037076	LOC689757	2.2511	1.44296	5.05778	0.866597	0.189251	0.52781	0.272549	0.047241	0.173845	-3.15524	1.42901e-05
MSTRG.4246.1	10	+	75049693	75054715	intergenic	2	3992	ENSRNOG00000035633	Mir142	5.34327	4.15444	9.01252	1.75777	0.577791	1.64431	0.787592	0.971859	1.12931	-2.16691	1.59125e-05
ENSRNOT00000088115	1	+	82371389	82373255	lincRNA	2	728	ENSRNOG00000057198	AC134759.1	3.15002	2.02882	5.75653	2.20003	0.735845	0.955289	1.27057	0.508126	0.421967	-1.92342	1.94082e-05
MSTRG.7616.1	14	-	34362488	34401611	antisense	2	517	ENSRNOG00000002164	Nmu	0.441202	0.665563	0.485841	0.663092	0.98046	1.5457	1.00235	0.854313	1.36005	1.14574	2.22921e-05
MSTRG.8609.1	15	-	39666748	39667848	intronic	2	659	ENSRNOG00000021712	Rcbtb1	0.508782	0.844409	2.99535	0.474367	0.182706	0.164048	0.046184	0.022701	0.104377	-3.35908	2.27337e-05
MSTRG.20404.1	7	+	12457848	12458822	intergenic	2	365	MSTRG.20404	.	0.436201	0.586395	0.89568	0.921401	1.17306	1.73032	1.58953	1.18422	2.06421	1.2697	2.61043e-05
MSTRG.11337.4	19	-	34660275	34740984	intronic	2	26776	ENSRNOG00000034007	Nr3c2	0.062502	0.212447	1.46873	1.26056	0.080181	0.052924	0.024491	0.034788	0.086102	-3.57661	3.06751e-05
MSTRG.6816.1	13	-	55160336	55169607	intronic	2	9228	ENSRNOG00000000655	Ptprc	0.547874	0.325356	4.87999	1.11243	0.170537	0.272561	0.180528	0.103244	0.086321	-3.22534	4.24953e-05
MSTRG.3377.1	10	+	23695403	23744436	intronic	3	29996	ENSRNOG00000028845	Ebf1	0.59125	0.344625	2.80691	0.880221	0.164117	0.23589	0.26707	0.124794	0.134884	-2.47513	5.25558e-05
MSTRG.17668.1	5	+	47550188	47623846	intronic	2	15443	ENSRNOG00000006170	Bach2	0.48253	0.328903	3.03225	0.631135	0.081589	0.234582	0.177967	0.095549	0.068129	-2.92391	6.28051e-05
MSTRG.6813.1	13	-	55124330	55146381	intronic	2	6267	ENSRNOG00000000655	Ptprc	0.367492	0.223715	3.4106	0.781111	0.081885	0.213263	0.117287	0.043943	0.086594	-3.2851	6.78221e-05
MSTRG.2346.2	1	-	221148751	221158792	intergenic	4	7047	ENSRNOG00000062127	AC134224.1	1.29958	1.5072	2.83263	3.95396	2.1936	19.0298	18.0247	7.72555	28.3072	2.79786	6.99728e-05
MSTRG.18989.1	5	-	172773313	172778518	intergenic	4	501	ENSRNOG00000057101	AABR07050652.1	4.88125	3.21524	5.30923	3.53945	4.70689	7.63161	8.33081	9.16933	9.82703	1.04268	8.96696e-05
ENSRNOT00000088499	2	+	147477431	147480010	pseudogene	1	2580	ENSRNOG00000061358	AC129365.1	1.21002	1.79309	2.01277	0.860194	0.219941	0.254098	0.716922	0.1965	0.136096	-2.13598	9.08932e-05
MSTRG.12464.1	2	+	150620921	150725394	intergenic	3	18059	ENSRNOG00000052742	RF00015	0.621448	0.427535	3.77759	0.852464	0.198382	0.335436	0.213237	0.140652	0.176636	-2.56926	0.000104321
MSTRG.11537.2	19	+	49818813	49841651	intronic	3	13201	ENSRNOG00000013178	Cmip	0.615698	0.103217	0.569419	2.02982	0.126099	0.064164	0.167358	0.059085	0.052117	-2.98916	0.000106259
ENSRNOT00000065330	20	-	5282945	5284025	unprocessed_pseudogene	3	688	ENSRNOG00000045908	AABR07044416.1	0.638053	0.489199	1.4655	0.517468	0.074673	0.263859	0.152649	0.235221	0.06478	-2.1059	0.000118552
MSTRG.95.21	1	-	11903994	11969909	antisense	3	2614	ENSRNOG00000047746	AABR07000398.1	22.2557	8.03972	2.2948	47.5928	0.04977	0.150403	2.5318	0.313518	0.043064	-4.89031	0.000120209
MSTRG.10022.10	17	-	42639709	42640718	sense	3	437	ENSRNOG00000003094	Cmahp	2.36432	1.17741	7.04058	0	0	0	0	0	0	-9.9267	0.000136535
MSTRG.13000.2	2	-	205483692	205519370	antisense	3	358	ENSRNOG00000054886	RF00100	0	0	13.8891	51.6386	0	0.006301	0	0.001114	0	-11.2134	0.000139263
MSTRG.17633.1	5	+	33403230	33407534	intronic	2	507	ENSRNOG00000006084	Cngb3	0.247649	0.429476	0.110104	0.138924	0.761024	0.851489	0.409086	1.58555	0.908591	2.036	0.000141789
MSTRG.95.2	1	-	11860496	11914695	antisense	3	3430	ENSRNOG00000055421	AABR07000385.1	0	0.001759	0.005321	0	0.000277	22.4293	14.0359	0	0	11.6978	0.000152177
MSTRG.6764.1	13	-	51582919	51631797	bidirectional	2	2170	ENSRNOG00000051440	Ppp1r12b	0.06524	0.093866	0.068588	0.07434	0.080748	9.16287	0.110978	0.052149	2.59614	5.07614	0.000163857
MSTRG.14684.1	3	+	28849436	28857696	intronic	2	8179	ENSRNOG00000031168	Arhgap15	0.40226	0.285562	3.08003	0.639411	0.146502	0.25412	0.121474	0.10971	0.09636	-2.74704	0.000163933
MSTRG.14685.1	3	+	28858338	28894906	intronic	3	35958	ENSRNOG00000031168	Arhgap15	0.382844	0.235834	2.48152	0.625405	0.120221	0.222448	0.146807	0.086334	0.113942	-2.58624	0.000174001
ENSRNOT00000092116	X	-	28686163	28698844	lincRNA	3	2071	ENSRNOG00000052695	LOC102549869	0.885041	0.742885	2.5608	0.454048	0.189266	0.371472	0.156404	0.19513	0.327325	-2.06347	0.000187997
ENSRNOT00000082578	16	-	26080258	26098379	lincRNA	2	1309	ENSRNOG00000055076	AABR07025023.1	0.913444	0.642662	2.01098	0.562914	0.171989	0.383748	0.231857	0.324935	0.342333	-1.66591	0.000212287
ENSRNOT00000093154	2	+	186776605	186808078	processed_transcript	13	1920	ENSRNOG00000043414	Fcrl5	0.796849	0.602172	3.28395	0.293259	0.013214	0.262261	0.063911	0.055435	0.13007	-3.39395	0.000216582
MSTRG.14682.1	3	+	28803068	28813147	intronic	2	9895	ENSRNOG00000031168	Arhgap15	0.689418	0.463038	4.55361	0.990698	0.224422	0.381669	0.287365	0.106415	0.152324	-2.69046	0.000217668
MSTRG.21012.1	7	-	100362229	100528211	antisense	3	3718	ENSRNOG00000056404	RF00026	0.316759	0.227233	1.87116	0.473316	0.02734	0.178231	0.073935	0.069582	0.124064	-2.75606	0.000225654
MSTRG.10143.1	17	+	49879986	49881658	intronic	2	1649	ENSRNOG00000013620	Cdk13	0.671536	0.595895	1.85535	1.84326	0.311762	0.340118	0.562269	0.235026	0.292813	-1.67379	0.000262963
MSTRG.24522.1	X	+	106667458	106668242	intergenic	2	413	MSTRG.24522	.	0.620539	0.703515	0.73359	0.642583	0.73715	1.05397	1.75115	1.5062	1.22843	1.01537	0.000282824
ENSRNOT00000092664	10	-	62153270	62163652	processed_transcript	6	633	ENSRNOG00000003123	Rpa1	0.516779	0.589609	1.08581	0	0.012823	0.010471	0.024007	0.02709	0	-4.65185	0.000293485
MSTRG.17262.1	4	-	162421532	162439845	antisense	3	2234	ENSRNOG00000059890	Clec2d2	6.81036	4.34505	15.8459	1.36639	0.006244	0.985806	0.215014	0.614211	0.543613	-3.75718	0.000321444
MSTRG.11067.1	19	-	10904203	10942310	sense	24	3653	ENSRNOG00000048222	Nlrc5	0.800415	0.949229	2.98867	1.25341	0.503089	0.404978	0.573081	0.325887	0.516577	-1.5302	0.000334695
ENSRNOT00000077204	5	+	133799175	133802097	lincRNA	2	365	ENSRNOG00000057688	AABR07049695.4	1.7668	2.61044	1.46792	1.2484	0.59985	0.895396	0.778033	0.631181	0.940421	-1.07971	0.000391442
MSTRG.6136.1	12	+	24682352	24801161	antisense	4	247	ENSRNOG00000029165	Stx1a	0.198261	0	0	0	134.942	0.005298	178.273	0.483545	0	10.2799	0.000441048
MSTRG.12213.1	2	-	96404381	96442222	antisense	2	17730	ENSRNOG00000011973	Il7	0.371558	0.310512	2.37239	0.591704	0.176819	0.241648	0.198355	0.123758	0.124812	-2.22829	0.000457245
MSTRG.14681.1	3	+	28776630	28784097	intronic	3	5473	ENSRNOG00000031168	Arhgap15	0.411742	0.319249	3.48497	0.665981	0.219539	0.255228	0.180729	0.124823	0.148854	-2.53818	0.00046095
MSTRG.11779.1	2	+	11762684	11765049	intronic	2	2034	ENSRNOG00000033134	Mef2c	0.343064	0.257809	1.85091	0.586636	0.068186	0.201907	0.209486	0.06858	0.070958	-2.45179	0.00046785
MSTRG.15462.1	3	-	131503674	131524000	intergenic	2	242	MSTRG.15462	.	0	0	0.024742	0	0	7.0393	0.082561	0.802079	0.144445	7.77272	0.000472104
MSTRG.15785.9	3	-	160872503	160891190	bidirectional	2	6508	ENSRNOG00000014297	Sdc4	7.33416	1.4635	2.70532	11.3379	1.40769	1.31697	1.46038	1.21301	1.19616	-1.97077	0.000493339
MSTRG.12968.3	2	-	200649735	200665090	intronic	2	829	ENSRNOG00000042884	Hsd3b3	0.117218	0.979973	1.6546	0	0	0	0	0	0	-8.92658	0.000574601
MSTRG.23025.3	9	+	9980335	9982456	sense	4	1048	ENSRNOG00000046050	Dennd1c	2.04002	1.73889	4.64035	2.13832	0.956146	1.06723	1.14276	1.32697	1.19545	-1.062	0.000650902
MSTRG.17391.1	4	+	179442213	179445644	antisense	2	3234	ENSRNOG00000027630	Casc1	0.60619	0.438084	2.23412	0.678145	0.180066	0.290194	0.297088	0.325758	0.28548	-1.68036	0.000834101
MSTRG.6136.3	12	+	24769211	24820642	antisense	3	249	ENSRNOG00000046700	Mettl27	0	23.6691	0	3.80698	0	0	0	0.004539	0	-10.5966	0.000907028
MSTRG.5009.1	10	+	112560406	112597035	antisense	2	573	ENSRNOG00000037220	AABR07031089.1	1.36478	1.19082	2.56641	2.35681	0.704287	0.870381	1.18696	0.573445	0.663346	-1.07438	0.00108561
MSTRG.16684.9	4	-	100797219	100818751	intergenic	2	9277	MSTRG.16684	.	0.107295	0.200581	2.66495	2.3636	0.215144	0.166809	0.20599	0.095424	0.098344	-2.92027	0.00108578
MSTRG.3333.2	10	-	16347458	16455269	intergenic	3	994	MSTRG.3333	.	6.354	0	15.5319	17.1155	0	0.268204	0.022372	0.000334	0	-7.18794	0.00115204
MSTRG.1714.10	1	+	180788606	181323308	intergenic	6	1064	MSTRG.1714	.	0	0	0	0	1.75207	4.42605	0	0	1.04789	10.4834	0.00115604
MSTRG.16214.2	4	-	40005426	40036563	sense	4	4431	ENSRNOG00000057290	Tmem168	0	0.007071	0	0	0	0	1.55405	0	7.81222	10.0909	0.00123908
MSTRG.10805.2	18	-	56884365	56989023	antisense	5	1732	ENSRNOG00000017106	Csnk1a1	0.100022	0.065648	0	0	2.12729	0.048658	1.89606	2.8755	0.113276	5.16161	0.00124907
MSTRG.1714.14	1	+	180791177	180898494	intergenic	6	567	MSTRG.1714	.	0	0	0	0	3.29896	2.80728	0	0	6.62615	10.4104	0.0012516
MSTRG.13065.2	2	-	209094983	209101317	antisense	4	3671	ENSRNOG00000017680	Dennd2d	0.933882	1.42909	4.28248	0.760866	0.32643	0.682612	0.484734	0.150797	0.389327	-2.03115	0.00125233
MSTRG.19519.8	6	-	76652046	76661889	bidirectional	3	852	ENSRNOG00000033776	LOC100359668	0	0.134134	0.009315	0.049252	0.023784	2.57133	0.018219	3.29256	1.32902	4.85747	0.00135705
MSTRG.16486.3	4	-	77447447	77453317	intergenic	2	449	MSTRG.16486	.	0.100213	0	0.238517	0.008735	0.337752	2.49799	0.307517	0.129017	5.68225	4.45217	0.00140397
MSTRG.8362.5	15	-	20440481	20444707	intergenic	2	4196	MSTRG.8362	.	5e-06	0.01083	0.026203	0	2.76747	0.022283	0.000115	0.000758	0.51425	6.24326	0.00149814
MSTRG.4995.5	10	+	111254234	111494147	antisense	2	7972	ENSRNOG00000049635	Vom2r65	2.98459	2.99602	6.06336	4.51722	1.68376	1.58219	2.94885	1.69161	1.31784	-1.02091	0.00159054
ENSRNOT00000080459	3	-	14659776	14700385	lincRNA	2	503	ENSRNOG00000058364	AABR07051515.1	0.652644	0.388549	2.59815	0.875196	0.184186	0.377241	0.397961	0.237919	0.179171	-1.85999	0.00162439
MSTRG.10655.1	18	-	31563854	31567228	intergenic	2	886	MSTRG.10655	.	2.66118	0.820057	2.74326	2.84235	0.244573	1.34614	0.312668	0.304124	0.29154	-2.03169	0.00164312
MSTRG.17526.1	5	+	16548244	16556182	intronic	2	7873	ENSRNOG00000008180	Lyn	0.636204	0.46718	3.73351	1.89515	0.472892	0.468358	0.469533	0.245989	0.289445	-1.94416	0.00173107
MSTRG.10804.1	18	+	56851605	56926114	bidirectional	2	14261	ENSRNOG00000017106	Csnk1a1	1.70388	0.745814	2.06704	1.26656	0.449283	0.819149	0.515577	0.327333	0.716268	-1.20689	0.00177159
MSTRG.1714.18	1	+	180852594	181323308	intergenic	6	1248	MSTRG.1714	.	0.364626	0.088572	0.061313	0.012642	4.573	0.016764	1.37358	1.61959	0.695655	3.75121	0.00184074
MSTRG.6740.2	13	-	50617546	50636150	intergenic	2	2100	MSTRG.6740	.	0.144006	0.134205	0.319272	0.627845	1.47418	1.10435	2.4446	0.506702	0.434601	2.10502	0.00202405
MSTRG.10909.2	18	-	70733211	70733638	intergenic	2	363	ENSRNOG00000061205	RF00492	0	0	0	0	0	0	2.75025	3.90392	5.20158	9.65456	0.00206399
MSTRG.10717.1	18	+	44754545	44758779	intronic	2	4201	ENSRNOG00000026136	Tnfaip8	0.369299	0.164326	1.692	0.75716	0.145341	0.132044	0.300108	0.079403	0.1077	-2.11449	0.00212428
MSTRG.17591.1	5	+	25272508	25340985	intergenic	2	280	ENSRNOG00000059459	AABR07047256.1	0.743202	1.02785	1.82026	1.45815	0.544878	0.358364	0.785642	0.256455	0.36664	-1.27548	0.00218838
MSTRG.5819.2	12	+	10298687	10327010	antisense	3	229	ENSRNOG00000048898	Wasf3	0.376934	1.35969	0.586874	0	0	0	0	0	0	-6.87985	0.0022965
MSTRG.22654.7	8	-	114054732	114064751	intergenic	3	838	MSTRG.22654	.	0.421984	0.019797	0.150439	1.58705	0.065262	0.038837	0.116214	0.020102	0.014449	-3.1906	0.00230549
MSTRG.12525.6	2	-	165098407	165140232	intergenic	2	524	MSTRG.12525	.	0	0.073547	0	0.057831	0.805459	1.46994	0	0.363399	4.86216	5.461	0.00239969
MSTRG.16616.1	4	-	96101309	96105553	intergenic	2	417	MSTRG.16616	.	0.445248	0.371928	1.366	3.25235	0.243157	0.50975	0.226971	0.17758	0.16997	-2.1853	0.00241134
ENSRNOT00000077213	3	+	129857245	129857586	pseudogene	1	342	ENSRNOG00000054840	AABR07053837.1	0.050056	0.00832	0.014897	0.059563	0.052502	0.146361	1.60765	0.025662	0.31319	3.66718	0.00279568
MSTRG.16535.2	4	+	82160367	82161654	intergenic	2	863	MSTRG.16535	.	0.247844	0.479597	0.144889	0.089402	0.864474	1.16653	1.30415	1.67637	0.136341	2.17601	0.00298924
MSTRG.18204.1	5	-	128597124	128604959	intergenic	2	422	MSTRG.18204	.	0.860957	0.705131	1.03333	0.631058	1.75902	1.86501	0.861096	1.13578	3.20463	1.2629	0.00304897
ENSRNOT00000093212	11	+	60371684	60385721	processed_transcript	3	614	ENSRNOG00000002141	Cd200	1.96201	1.61064	3.77613	3.18643	0.882971	1.08878	1.03626	1.87822	0.825785	-1.05153	0.0031584
MSTRG.22559.2	8	-	104414369	104423983	bidirectional	2	1379	ENSRNOG00000011909	Rasa2	1.2262	1.66353	2.8214	1.94233	0.365158	0.616073	1.07178	0.187564	0.763233	-1.52545	0.00319253
MSTRG.10000.1	17	+	37527359	37627830	intergenic	3	622	ENSRNOG00000058289	AABR07027575.1	3.96592	1.01686	0	0	0	0	0	0	0	-9.40135	0.00324745
MSTRG.11959.7	2	-	39079394	39143289	intergenic	2	11546	MSTRG.11959	.	0.539539	0.510373	2.49004	2.35934	0.641144	0.42	0.317407	0.347495	0.324779	-1.68135	0.00330669
MSTRG.22392.1	8	-	76916954	76936472	intronic	2	8001	ENSRNOG00000060750	Rnf111	0.801601	0.553258	2.45188	1.77142	0.452228	0.52868	0.686944	0.449919	0.369522	-1.33072	0.00333312
MSTRG.13661.1	20	-	4886865	4906591	antisense	2	1686	ENSRNOG00000051805	AABR07044408.1	2.30927	0.728597	4.48087	2.16645	0.582302	0.356168	1.38044	0.525759	0.437706	-1.72458	0.00354042
MSTRG.17445.1	5	+	175313	180454	intergenic	2	240	MSTRG.17445	.	1.28666	1.03569	2.98036	2.46434	0.397514	0.486698	1.31134	0.554252	0.326631	-1.48189	0.00357852
MSTRG.23315.6	9	-	43455225	43515681	intergenic	3	5494	ENSRNOG00000057258	AABR07067404.2	0.932567	0.865215	3.35422	1.93662	0.849757	0.594338	0.654357	0.532568	0.677057	-1.25967	0.00360854
MSTRG.22039.3	8	-	49304129	49308973	sense	4	780	ENSRNOG00000016069	Cd3e	0.644652	0.673003	2.11458	0.563588	0	0.165043	0.251404	0.18753	0.154562	-2.5438	0.00364205
ENSRNOT00000046606	18	+	70959887	70960786	processed_pseudogene	1	900	ENSRNOG00000042387	Slc25a6	0.797122	0.729868	0.341252	0.180271	0.843597	0.66453	3.25226	1.93989	1.61038	1.79968	0.00408806
MSTRG.21012.2	7	-	100476529	100528211	intergenic	3	2540	MSTRG.21012	.	1.11411	0.862293	2.9141	0.82268	0.416845	0.66377	0.39395	0.573289	0.643885	-1.24997	0.00425319
MSTRG.13000.4	2	-	205483831	205516111	antisense	3	279	ENSRNOG00000054886	RF00100	303.044	402.62	188.547	148.029	372.982	509.833	411.064	529.489	635.293	1.0358	0.00427143
MSTRG.22614.1	8	+	108958631	108979823	intronic	3	8949	ENSRNOG00000015389	Stag1	0.605716	0.644016	1.62599	1.30122	0.53464	0.418469	0.597514	0.343087	0.446327	-1.00469	0.00470343
MSTRG.4150.2	10	+	70438042	70444908	intergenic	4	3180	MSTRG.4150	.	3.02509	1.0916	5.99573	1.74941	0.712827	1.35757	1.22119	0.744927	0.931202	-1.4223	0.00471962
ENSRNOT00000079900	2	+	57677745	57677905	pseudogene	1	161	ENSRNOG00000058320	AABR07008420.1	2.06458	3.10461	4.62149	3.20262	1.04528	1.91435	2.17975	1.2323	0.835088	-1.0223	0.00479017
MSTRG.10885.2	18	+	65855294	65862604	intronic	2	390	ENSRNOG00000011853	Mbd2	0.071263	0.650587	1.8209	2.67382	0.1465	0.43898	0.122236	0.096742	0.025348	-2.76969	0.00498606
MSTRG.4611.2	10	+	91446067	91452945	antisense	3	2743	ENSRNOG00000028569	Arhgap27	0.163186	0.463659	0.104401	1.34733	0.020799	0	0.129102	0.048261	0.042984	-3.2748	0.00511086
MSTRG.14697.1	3	+	33126352	33136499	intergenic	2	4388	MSTRG.14697	.	0.645016	0.438607	1.7742	1.56522	0.370527	0.525181	0.464344	0.354881	0.177558	-1.39316	0.00520652
MSTRG.7504.1	14	-	16701338	16709902	intronic	2	4379	ENSRNOG00000002208	Shroom3	0.607084	0.655237	1.98778	2.43009	0.541584	0.420657	0.668766	0.347001	0.515491	-1.35197	0.00530328
MSTRG.21899.1	8	+	33153256	33155432	intergenic	2	2043	MSTRG.21899	.	0.583363	0.44092	1.85529	1.63568	0.243313	0.497064	0.553745	0.265451	0.328267	-1.42194	0.00553586
MSTRG.11478.2	19	+	42956152	43001155	bidirectional	3	3000	ENSRNOG00000051461	Rfwd3	0.52186	0.502196	2.24702	1.62857	0.449711	0.470506	0.533018	0.324179	0.277342	-1.41401	0.00564168
ENSRNOT00000076395	13	-	78498361	78500686	sense_intronic	2	728	ENSRNOG00000051201	AABR07021565.1	1.28562	1.00118	3.2108	2.78329	0.986118	0.795168	1.15443	0.585332	0.535682	-1.19402	0.00568484
MSTRG.95.16	1	-	11903552	11973025	antisense	3	3504	ENSRNOG00000047746	AABR07000398.1	10.3959	93.2501	18.8944	4.61419	3.19209	13.4025	2.75706	2.16407	2.7213	-2.62483	0.00591072
MSTRG.16123.1	4	+	23548440	23599250	intergenic	2	202	MSTRG.16123	.	5.41407	4.40024	0	0	0	0	0	0	0	-8.77019	0.00604408
MSTRG.7416.1	14	-	5572205	5600940	intergenic	2	1247	MSTRG.7416	.	0.968223	0.615647	2.53914	2.25817	0.802917	0.473598	0.722313	0.494675	0.316922	-1.34783	0.00614251
MSTRG.7044.6	13	-	86600276	86671458	bidirectional	2	35827	ENSRNOG00000058096	AABR07021704.1	0.989826	0.107618	2.06668	2.10766	0.137344	0.133901	0.159294	0.627849	0.097731	-2.35594	0.00623472
ENSRNOT00000090651	4	-	58408730	58485447	lincRNA	5	1234	ENSRNOG00000054990	AABR07060133.1	0.649481	0.40916	1.31615	1.0882	0.543553	0.303525	0.406637	0.30997	0.249099	-1.09718	0.00624144
MSTRG.6008.1	12	-	19345795	19346494	intergenic	2	247	MSTRG.6008	.	0	0.188472	0	0.151099	0.216041	3.29576	0.414348	0.567975	0.322086	3.50703	0.00625114
MSTRG.23428.4	9	-	61492001	61529548	bidirectional	3	30704	ENSRNOG00000021384	Ankrd44	0.611596	0.570844	3.48455	1.92886	0.487391	0.544408	0.716684	0.329853	0.344201	-1.60384	0.00631475
MSTRG.10342.1	17	-	85701038	85767546	intergenic	2	4370	ENSRNOG00000056540	AABR07028776.1	0.34381	0.212781	1.76054	0.783014	0.216237	0.269983	0.284084	0.129903	0.190657	-1.66088	0.00636092
MSTRG.11628.1	19	-	55807022	55861505	intergenic	2	9271	MSTRG.11628	.	0.359361	0.245401	1.49117	1.96938	0.214185	0.231839	0.461987	0.155677	0.237958	-1.80437	0.00660187
MSTRG.12967.3	2	+	200646003	200661125	intronic	3	843	ENSRNOG00000042884	Hsd3b3	0.331294	0.060159	0.243845	2	0.057714	0.157743	0.155089	0.077812	0.089726	-2.41841	0.00695283
ENSRNOT00000004798	14	+	21163840	21164295	processed_pseudogene	1	456	ENSRNOG00000003606	AABR07014550.1	0.635798	2.94047	0.534639	2.99434	0.964738	42.3633	6.757	6.34042	3.05971	2.84219	0.0069817
MSTRG.12398.1	2	+	141475632	141507241	intronic	2	16256	ENSRNOG00000013397	Foxo1	0.719238	0.687137	4.73646	3.05856	0.476172	0.571934	1.13443	0.339614	0.334814	-1.84708	0.00716001
MSTRG.15852.3	3	-	164228083	164281911	antisense	2	1023	ENSRNOG00000060821	Rnf114	0.468745	0	0	1.27595	0	0	0	0	0	-8.57202	0.00729173
MSTRG.13690.1	20	+	5336884	5381071	antisense	3	1253	ENSRNOG00000061996	AABR07044420.1	3.8858	2.96312	6.76327	3.01433	1.34626	1.31444	3.11213	1.6318	1.92457	-1.00871	0.00730939
MSTRG.23943.1	X	-	658511	694799	intergenic	2	793	MSTRG.23943	.	0.17455	0.201054	1.85606	1.08651	0.255942	0.06857	0.13694	0.075375	0.252912	-2.17364	0.00731161
MSTRG.8448.2	15	-	28491358	28493561	intronic	2	1993	ENSRNOG00000011621	Hnrnpc	0.753577	1.0212	3.2199	1.0124	0.53421	0.823173	0.487191	0.54596	0.398102	-1.27331	0.00737401
MSTRG.60.1	1	+	8164376	8188392	intergenic	2	3184	MSTRG.60	.	0.346398	0.335143	1.81625	0.958278	0.284087	0.233522	0.381997	0.118923	0.067446	-1.82778	0.00739524
MSTRG.2898.1	1	+	266361997	266429474	antisense	2	3644	ENSRNOG00000020035	Cyp17a1	0.692923	0.788982	2.28202	1.8102	0.565052	0.679782	0.773634	0.39977	0.447217	-1.12852	0.00745251
MSTRG.15126.1	3	+	103752083	103758783	bidirectional	3	6442	ENSRNOG00000005196	Slc12a6	1.98028	1.81781	5.21887	2.25624	1.0112	1.32658	1.87067	0.897202	0.77827	-1.11008	0.00763078
MSTRG.3449.1	10	-	34188742	34247074	antisense	3	3582	ENSRNOG00000002469	Trim7	1.87541	1.08188	4.02562	4.23805	1.21433	1.15387	1.54347	0.892947	0.852211	-1.15557	0.00764072
ENSRNOT00000090372	5	-	107323288	107323733	pseudogene	1	446	ENSRNOG00000051484	AABR07049134.1	0.26679	0.089741	0.082005	0.104835	0.177478	0.678051	0.081889	0.54711	1.25962	2.12157	0.00782024
MSTRG.13796.2	20	+	8762893	8834949	antisense	2	7859	ENSRNOG00000059127	RF00408	0.136096	0.145581	1.46778	1.59815	0.193369	0.243014	0.212367	0.074271	0.079291	-2.21497	0.00797102
MSTRG.1714.20	1	+	180861262	181295452	intergenic	5	657	MSTRG.1714	.	0.676919	1.05332	0.715592	0.849234	3.57146	1.08377	0.852652	2.04586	1.41964	1.25348	0.00809666
MSTRG.20016.1	6	+	135423621	135481566	intergenic	2	1974	MSTRG.20016	.	0.657487	0.882541	3.64607	2.4978	0.737331	0.633163	0.876406	0.458735	0.538144	-1.40351	0.0082121
ENSRNOT00000057756	6	-	114760440	115141057	processed_transcript	23	3307	ENSRNOG00000003908	Cep128	0.066737	2.1951	4.2735	0.013168	0	0.151197	0	0.046908	0.047594	-4.90191	0.00844763
ENSRNOT00000078268	8	+	46501033	46503448	lincRNA	3	205	ENSRNOG00000058361	AABR07073391.1	0.838404	0.728791	1.68601	0.309699	0.059087	0.411823	0.32438	0.148544	0.326838	-1.63303	0.00847103
MSTRG.10023.1	17	-	42630643	42632807	intronic	2	2049	ENSRNOG00000003094	Cmahp	0.565511	0.535417	2.0567	1.55556	0.437159	0.439505	0.44692	0.096698	0.375865	-1.54954	0.00847186
MSTRG.17443.1	5	+	129368	171808	intergenic	2	1242	MSTRG.17443	.	1.15512	1.34533	2.16412	1.00462	0.231607	0.231293	1.08525	0.516114	0.334684	-1.42086	0.00852646
MSTRG.12397.6	2	+	141507316	141522329	intronic	2	14990	ENSRNOG00000013397	Foxo1	0.489973	0.411334	2.90169	1.92672	0.350044	0.333719	0.726439	0.174741	0.240161	-1.80854	0.00860661
MSTRG.22230.1	8	-	64238973	64244159	intronic	2	4944	ENSRNOG00000009887	Arih1	0.549308	0.518953	2.28492	1.856	0.374807	0.437815	0.717668	0.361784	0.35409	-1.377	0.00862906
MSTRG.23683.9	9	-	86370216	86475836	intergenic	3	5192	ENSRNOG00000053200	AABR07068161.1	0.424248	0.395344	1.80443	0.475001	0.258205	0.32446	0.318069	0.232312	0.254639	-1.31819	0.00863788
ENSRNOT00000083380	3	+	114650518	114652214	lincRNA	2	683	ENSRNOG00000052651	LOC102556085	0.274682	0.168937	1.05356	0.593983	0.266567	0.094021	0.110261	0.119683	0.02266	-1.90523	0.00889599
MSTRG.13051.1	2	-	208242060	208326452	antisense	2	7940	ENSRNOG00000048272	LOC100911347	0.497479	0.498111	2.29598	1.45648	0.457815	0.37141	0.61115	0.303107	0.226212	-1.42987	0.0090117
MSTRG.17704.1	5	+	55847058	55860460	intergenic	2	1017	MSTRG.17704	.	0.50534	0.291552	1.96888	1.31846	0.365421	0.424251	0.393116	0.223196	0.184279	-1.51576	0.00906906
MSTRG.11318.1	19	+	32832245	32837612	intergenic	2	326	ENSRNOG00000053062	AABR07043625.1	1.61279	0.616498	2.1875	1.48643	0.326078	0.771222	0.311307	0.887799	0.497183	-1.2349	0.00909293
ENSRNOT00000076134	3	-	37926794	37946999	processed_transcript	6	756	ENSRNOG00000006839	Arl5a	0.901098	0.412858	1.89169	1.58681	0.346504	0.656488	0.434212	0.535122	0.222892	-1.28858	0.00913395
MSTRG.7627.3	14	+	35714078	35718899	bidirectional	2	4796	ENSRNOG00000002267	Chic2	0.42106	0.442363	1.23149	1.15763	0.456721	0.342931	0.403082	0.285196	0.263764	-1.05823	0.00922629
ENSRNOT00000092811	7	+	102648881	102791155	lincRNA	4	823	ENSRNOG00000062170	AABR07058158.1	0.494273	0.439334	1.12523	0.868525	0.208925	0.332824	0.498384	0.12606	0.250342	-1.2097	0.00948851
MSTRG.6763.1	13	+	51385105	51396276	intronic	2	11035	ENSRNOG00000060544	Kdm5b	1.06638	0.798158	2.63022	2.6002	0.797571	0.786259	1.02078	0.578523	0.626208	-1.0649	0.00972725
MSTRG.4662.11	10	-	92503571	92518716	intergenic	3	13386	MSTRG.4662	.	0.558964	0.507309	1.82827	1.61486	0.441808	0.500371	0.602162	0.333033	0.3884	-1.15868	0.00990417
MSTRG.13501.38	20	-	2884388	2887069	intergenic	2	1746	MSTRG.13501	.	5.2112	0.187324	5.78665	0.765519	0.173108	1.28177	0.277577	0.210787	0.092369	-2.73057	0.00996725
MSTRG.19476.1	6	-	72489569	72594076	antisense	3	4137	ENSRNOG00000005765	Ap4s1	0.41078	0.391405	1.58318	1.48998	0.382714	0.399458	0.424717	0.215423	0.324705	-1.31142	0.00997031
ENSRNOT00000030811	13	-	93560364	93561301	pseudogene	1	938	ENSRNOG00000021960	AC109958.1	0.059344	0.049304	0.072655	0.060708	0.052301	0.067438	0.52869	1.0533	0.043544	2.55972	0.0100607
MSTRG.17293.1	4	+	167763058	167778098	intronic	3	3026	ENSRNOG00000005984	Etv6	0.495446	0.34099	2.11822	1.8884	0.40258	0.235362	0.638158	0.210996	0.184991	-1.68982	0.010473
MSTRG.17680.1	5	-	48344861	48353742	intergenic	3	2166	MSTRG.17680	.	0.998275	0.823572	2.21434	0.332896	0.209935	0.659928	0.054744	0.210085	0.147877	-1.94227	0.0107329
MSTRG.16996.1	4	+	144982909	145095245	sense	6	17191	ENSRNOG00000007472	Setd5	1.74428	1.48447	4.56825	4.4802	1.56639	1.42825	1.62845	0.801243	0.959285	-1.11099	0.0109071
MSTRG.7415.8	14	-	5568094	5786110	intergenic	4	1056	ENSRNOG00000057936	AABR07014218.1	0	0	0.013559	0	0.514658	0	0	0	3.76307	8.16044	0.0110431
MSTRG.5598.1	11	-	86127755	86161020	intergenic	2	1216	MSTRG.5598	.	0.61887	0.462165	2.43804	0.137598	0	0.114041	0.080093	0	0	-4.41581	0.0110959
MSTRG.14666.1	3	-	23098111	23102003	intergenic	2	3706	MSTRG.14666	.	0.401099	0.223125	1.67034	1.85042	0.337315	0.280471	0.41636	0.081617	0.158785	-1.85624	0.011196
MSTRG.15088.1	3	+	94561310	94577831	intronic	2	16369	ENSRNOG00000012089	Cstf3	0.849253	0.861429	2.60857	2.08758	0.743129	0.772282	0.934677	0.546653	0.484448	-1.0487	0.0113511
MSTRG.108.1	1	+	15449895	15541261	antisense	3	4443	ENSRNOG00000056978	RF00406	0.500914	0.424456	1.85287	1.49315	0.539045	0.381668	0.455217	0.271385	0.347281	-1.25803	0.0113613
MSTRG.13438.1	20	-	134200	135527	intergenic	2	399	MSTRG.13438	.	0.703715	0.623596	1.3639	2.03232	0.21954	0.554755	0.692204	0.288315	0.476089	-1.23792	0.0115519
MSTRG.23564.1	9	-	76743632	76758515	intronic	2	5320	ENSRNOG00000027430	Ikzf2	0.302159	0.134697	1.50088	0.964027	0.149105	0.1557	0.378104	0.07999	0.075859	-1.94302	0.0115648
MSTRG.22052.1	8	+	50310924	50360720	intronic	2	3089	ENSRNOG00000045931	Sik3	0.669786	0.437844	1.82239	1.71412	0.436882	0.306659	0.739603	0.339952	0.287651	-1.30225	0.0116041
MSTRG.10515.1	18	+	24642246	24723734	antisense	2	4586	ENSRNOG00000016216	Sft2d3	0.93905	0.847858	3.04078	2.02727	0.754962	0.890146	0.878146	0.39206	0.501461	-1.1709	0.0116575
ENSRNOT00000091080	20	-	30041461	30263742	lincRNA	13	1907	ENSRNOG00000061835	AABR07044980.1	0.157888	0.701582	0.526782	1.8068	0.089771	0.251657	0.120936	0.236736	0.356004	-1.77701	0.0117748
MSTRG.14653.1	3	-	21927488	21947368	intergenic	3	19594	MSTRG.14653	.	0.392915	0.755706	3.86432	3.55911	0.812661	0.361286	0.546732	0.625158	0.595137	-1.6975	0.0118462
MSTRG.14667.1	3	-	23149394	23203276	intergenic	2	3691	ENSRNOG00000035630	Mir181a2	0.675028	0.066377	0.573468	3.00597	0.163651	0.162072	0.098818	0.422112	0.159511	-2.26763	0.0120753
MSTRG.17806.3	5	+	60264950	60349645	intronic	3	29517	ENSRNOG00000013078	Zcchc7	0.490763	0.37829	1.653	2.14007	0.377228	0.394514	0.620684	0.233011	0.22132	-1.50181	0.0121198
MSTRG.18835.1	5	-	160258756	160301206	antisense	2	894	ENSRNOG00000051225	AABR07050304.1	0.484518	0.576571	1.73578	1.25469	0.611557	0.369106	0.406529	0.357429	0.397579	-1.07457	0.0121414
MSTRG.16923.1	4	+	124735522	124792187	antisense	2	592	ENSRNOG00000023257	Adamts9	0	3.19007	2.46416	2.82558	0.105512	0	0	0	0	-6.47654	0.0123654
MSTRG.18204.3	5	-	128597304	128604965	intergenic	2	248	MSTRG.18204	.	0.131645	0.361042	0.575438	0.237005	1.19782	1.91381	0.287759	0.214861	2.8898	2.08963	0.0123697
MSTRG.3251.3	10	-	14365819	14373334	sense	2	6064	ENSRNOG00000024635	Cramp1	0.880875	0.739336	2.47873	2.53366	0.834897	0.743275	0.82725	0.470211	0.556198	-1.11564	0.0124175
MSTRG.17945.2	5	-	78017655	78018231	intergenic	2	493	MSTRG.17945	.	0	0	0	0	1.3937	1.50614	0	0	0	8.06491	0.0124536
MSTRG.11712.1	19	-	59932221	59984683	bidirectional	2	286	ENSRNOG00000051482	Hmg1l1	0	0	0	0	0	3.10125	1.92053	0	0	8.05235	0.0125914
MSTRG.23937.1	9	+	121999033	122079855	intergenic	3	1254	MSTRG.23937	.	1.92785	1.35191	2.11843	1.24654	0.264023	0.27938	1.4118	0.546777	0.377685	-1.38992	0.0127049
MSTRG.9364.1	16	-	48682507	48727963	intronic	2	7729	ENSRNOG00000009824	Irf2	0.523719	0.346821	1.91443	1.51432	0.35187	0.404028	0.596105	0.264166	0.264128	-1.35578	0.0135264
MSTRG.7787.4	14	-	46635097	46681428	antisense	3	958	ENSRNOG00000055956	AABR07015078.1	2.08104	1.55816	4.47923	1.41419	0.469889	1.58551	0.5454	1.20563	0.621176	-1.28322	0.0135314
MSTRG.1739.8	1	-	187854678	187872593	intergenic	3	17765	ENSRNOG00000047386	Smg1	0.546964	0.499154	2.34411	1.80357	0.502122	0.468114	0.698765	0.301074	0.328628	-1.3379	0.0136055
MSTRG.63.1	1	+	8249365	8261730	intergenic	2	10185	MSTRG.63	.	0.350213	0.316138	2.18729	1.29551	0.379345	0.313738	0.460931	0.172431	0.245938	-1.55424	0.0139735
MSTRG.14398.1	3	-	8325409	8337963	intergenic	3	2027	MSTRG.14398	.	0.056214	0.017756	1.0791	0.03975	0.906368	1.64758	1.8902	2.01547	1.598	2.61358	0.0144925
ENSRNOT00000093582	15	+	51761603	51762080	lincRNA	1	478	ENSRNOG00000062261	AC111804.2	0.301504	0.022538	1.26391	0.046478	0	0.020392	0.105611	0	0.006216	-3.61856	0.0145313
MSTRG.15680.3	3	-	152972061	153006600	sense	2	1513	ENSRNOG00000036813	Ndrg3	1.11565	4.87681	3.49295	1.79958	5.32506	5.56959	7.85914	4.9127	4.42613	1.11871	0.0145684
MSTRG.18604.8	5	-	150524748	150531093	bidirectional	2	2241	ENSRNOG00000052548	RF00045	1.88004	4.47464	4.56183	5.64793	0.883502	2.04057	2.94372	0.65455	0.983666	-1.33025	0.0145941
MSTRG.16096.9	4	+	14039916	14071176	sense	3	263	ENSRNOG00000040108	RGD1565355	4.24191	1.93838	1.06122	3.05767	0.941659	1.5736	0.908552	1.28096	1.00538	-1.03905	0.0153175
MSTRG.2346.4	1	-	221149209	221158792	intergenic	3	6620	ENSRNOG00000062127	AC134224.1	0.12071	0.267659	0	0	0	3.05519	37.6748	37.7265	0	7.40621	0.0155471
MSTRG.23561.1	9	+	76275177	76363323	intergenic	2	440	MSTRG.23561	.	0.751068	0.795494	3.204	2.35075	0.50779	0.732519	1.04605	0.271543	0.326838	-1.45874	0.0155806
MSTRG.5133.9	11	+	34893139	34962839	bidirectional	2	28924	ENSRNOG00000001662	Dyrk1a	0.518899	0.376902	2.15173	1.66333	0.436278	0.43182	0.614238	0.257526	0.30585	-1.36419	0.015671
MSTRG.21297.1	7	-	122372389	122400233	intronic	2	27451	ENSRNOG00000018803	Mkl1	0.432837	0.343282	1.6775	1.79534	0.337238	0.359621	0.604654	0.199978	0.219156	-1.46867	0.0157231
MSTRG.14006.7	20	-	28390714	28402202	intergenic	2	3241	MSTRG.14006	.	0.932802	1.64074	1.83497	0.094348	0.19777	0.505896	0.392381	0.159749	0.151563	-1.87041	0.0157397
MSTRG.7552.3	14	+	19292791	19318151	intergenic	2	25253	MSTRG.7552	.	0.855192	0.756031	3.57605	2.88552	0.798093	0.737418	1.1084	0.456696	0.478701	-1.33589	0.0158385
MSTRG.15016.5	3	-	80858060	80861127	intronic	2	2905	ENSRNOG00000017737	Dgkz	1.67282	1.00001	4.44069	2.77155	1.01269	0.876393	1.6762	0.706558	0.62248	-1.17965	0.015906
MSTRG.7390.7	14	+	4138448	4151567	bidirectional	2	12841	ENSRNOG00000002112	Zfp644	0.693498	0.625432	2.58323	1.97232	0.657439	0.571045	0.833111	0.390744	0.401764	-1.20432	0.0161183
MSTRG.21978.2	8	-	46226800	46244671	intergenic	3	6126	MSTRG.21978	.	0.271248	0.184983	0.713842	1.8417	0.213147	0.150066	0.366928	0.176935	0.071646	-1.78793	0.016154
MSTRG.7735.2	14	-	46100374	46111589	intergenic	3	9425	MSTRG.7735	.	0.519102	0.51605	2.81133	2.87402	0.518869	0.512133	0.877173	0.288591	0.3376	-1.56776	0.0161725
MSTRG.17999.5	5	+	91124188	91212984	intergenic	4	2983	ENSRNOG00000053483	RF01518	0.140216	0.425963	0.07107	0.097898	1.10897	0.149359	0.146373	0.344737	2.78084	2.41654	0.0162295
MSTRG.18418.1	5	+	140632912	140726688	antisense	2	9190	ENSRNOG00000014008	Mfsd2a	0.470691	0.429645	1.8278	1.70494	0.39437	0.380068	0.669873	0.290594	0.273248	-1.30643	0.0164428
MSTRG.17886.1	5	+	72105552	72116633	intronic	2	10923	ENSRNOG00000016137	Rad23b	1.10748	0.930323	3.12655	2.71074	1.00344	0.836803	1.1817	0.570599	0.683669	-1.04694	0.0164738
MSTRG.19477.1	6	-	72498147	72579837	antisense	2	3319	ENSRNOG00000005765	Ap4s1	0.478348	0.368698	1.81928	1.5818	0.404416	0.481109	0.504596	0.234401	0.320423	-1.28709	0.0165859
MSTRG.23429.1	9	-	61482758	61557797	antisense	4	7035	ENSRNOG00000032740	Tmem258b	0.261456	0.171374	2.00566	1.12285	0.218068	0.296189	0.371587	0.109065	0.163018	-1.77542	0.0167541
MSTRG.17808.1	5	+	60295872	60321913	intronic	2	25998	ENSRNOG00000013078	Zcchc7	0.918421	0.620535	3.26871	2.3408	0.693149	0.642283	1.06302	0.466422	0.432771	-1.27889	0.0173014
MSTRG.1714.53	1	+	181221563	181295155	intergenic	4	307	MSTRG.1714	.	0	0	0	0	0.842765	2.73677	0	0	0	7.67717	0.0173794
MSTRG.18775.1	5	+	157416897	157487796	bidirectional	2	4728	ENSRNOG00000017244	Rnf186	0.72635	0.008695	1.30531	2.22234	0.026485	0.356538	0.037982	0.00265	0.002461	-3.49035	0.0176194
MSTRG.17999.25	5	+	91134010	91137954	intergenic	3	2730	ENSRNOG00000056963	RF00002	5.15699	13.7425	8.80916	1.95653	20.1675	72.513	19.8846	16.7261	4.27295	1.95892	0.0176601
MSTRG.21024.1	7	-	104547647	104549869	intronic	2	2199	ENSRNOG00000061246	Fam49b	1.25585	1.32953	5.44999	3.17992	1.38169	0.920049	1.51511	0.905344	0.55385	-1.24941	0.0176899
MSTRG.11539.1	19	+	49823904	49885573	intronic	2	7469	ENSRNOG00000013178	Cmip	0.670333	0.545245	3.02501	3.01364	0.653125	0.556025	0.955297	0.342205	0.444962	-1.45715	0.0177497
MSTRG.14571.3	3	+	17866718	17872245	intergenic	3	350	MSTRG.14571	.	4.69186	15.1282	7.03829	8.89469	3.32824	4.42853	3.60997	6.42952	2.6135	-1.01052	0.0178239
MSTRG.18055.18	5	+	105193194	105207606	antisense	2	2375	ENSRNOG00000049025	LOC100911372	0.344526	0.172581	0.468611	0.781764	0.724399	4.82603	0.986309	2.64406	0.094224	2.20311	0.0179651
MSTRG.18000.1	5	-	91113433	91136536	intergenic	2	608	ENSRNOG00000056963	RF00002	0	0.019068	0.216745	0.284221	11.8298	4.41678	0	6.71673	0	5.27791	0.018137
MSTRG.9731.1	17	+	9549064	9609231	antisense	2	4673	ENSRNOG00000021886	B4galt7	0.298286	0.289532	1.50677	1.18549	0.330901	0.291605	0.41123	0.172618	0.135548	-1.44955	0.0181858
MSTRG.18070.1	5	-	106301147	106309882	intergenic	2	8714	MSTRG.18070	.	0.456452	0.308898	2.35587	2.37369	0.50006	0.379073	0.638481	0.247127	0.222614	-1.62451	0.0182783
MSTRG.18204.2	5	-	128597294	128605043	intergenic	2	336	MSTRG.18204	.	1.08139	0.812668	0.766561	0.630243	1.15162	1.43641	0.952367	1.07618	3.06949	1.02352	0.0183343
MSTRG.8121.1	14	+	106135742	106141335	intergenic	2	5543	ENSRNOG00000054683	RF00560	0.77072	0.667562	2.89358	1.99212	0.580637	0.760299	0.917354	0.416652	0.413164	-1.19815	0.0185943
MSTRG.7510.1	14	-	16770163	16818736	antisense	2	3269	ENSRNOG00000043813	AABR07014478.1	1.21605	1.25263	3.71751	4.89355	0.999289	0.791991	1.75106	0.832432	1.05857	-1.19418	0.0186567
MSTRG.18576.1	5	+	148849070	148858983	intronic	2	795	ENSRNOG00000011709	Pum1	0.806829	0.711653	2.77614	2.74516	1.11502	0.650434	0.548219	0.325833	0.273233	-1.43346	0.0187592
MSTRG.22354.4	8	+	72029489	72106226	sense	3	3782	ENSRNOG00000051671	Herc1	0.587299	0.41759	2.06725	1.28408	0.578367	0.436284	0.487996	0.407871	0.255325	-1.16735	0.0189592
MSTRG.24679.1	X	-	135262715	135279779	intergenic	2	16924	MSTRG.24679	.	0.578038	0.556113	2.17099	1.96532	0.573654	0.530705	0.742475	0.364792	0.419739	-1.16585	0.0191436
MSTRG.17292.1	4	+	167759318	167762590	intronic	2	1283	ENSRNOG00000005984	Etv6	0.457141	0.609557	2.20938	1.69362	0.498507	0.235518	0.723933	0.456555	0.359711	-1.28646	0.0192042
MSTRG.6662.1	13	+	44465677	44541813	antisense	3	4106	ENSRNOG00000003952	AABR07020879.1	0.551256	0.525218	3.01275	2.2622	0.654872	0.542729	0.738128	0.396707	0.436318	-1.356	0.0192361
MSTRG.5900.1	12	+	13552370	13597627	intronic	2	4690	ENSRNOG00000001101	Rnf216	0.420966	0.437987	1.89365	1.67428	0.465644	0.443886	0.565175	0.306299	0.298946	-1.25074	0.0192623
MSTRG.15591.1	3	+	148863244	148881533	intronic	2	16657	ENSRNOG00000061603	Asxl1	0.541138	0.321679	2.56709	2.05286	0.499272	0.431135	0.679891	0.245427	0.255728	-1.53455	0.0195882
MSTRG.19291.25	6	+	30640365	30641352	intronic	2	747	ENSRNOG00000050156	AABR07063425.2	0.738534	579.911	227.872	0.613822	0	0	0	6.71849	0	-7.14159	0.0196347
MSTRG.12074.5	2	-	57659003	57676640	intergenic	2	17528	MSTRG.12074	.	1.17342	1.01032	3.61278	2.90647	0.923024	0.86127	1.46978	0.731919	0.727279	-1.05142	0.0196966
MSTRG.14977.1	3	-	79327611	79384253	intronic	2	17143	ENSRNOG00000034025	Ptprj	0.444727	0.332636	1.94606	1.48947	0.459843	0.302761	0.568466	0.230376	0.18753	-1.42765	0.019995
MSTRG.5750.1	12	+	4728044	4734676	intergenic	2	1427	MSTRG.5750	.	0.556341	0.745595	2.25969	1.83223	0.627708	0.482156	0.854152	0.410809	0.356987	-1.1441	0.0200768
MSTRG.1713.1	1	+	180591137	180704835	intergenic	3	890	MSTRG.1713	.	0.093836	0.158456	0.123287	0.121727	0.141767	0.06921	0.779793	1.40592	0.104475	2.10663	0.020219
ENSRNOT00000043950	3	-	149960776	149961362	pseudogene	1	587	ENSRNOG00000050899	AABR07054362.1	0.043091	0.410293	0.945402	0.725377	1.47359	1.19401	1.47251	1.24847	1.31235	1.47562	0.0204898
MSTRG.13048.4	2	-	208252097	208271939	intergenic	2	5499	MSTRG.13048	.	0.958479	0.819726	3.70116	2.58151	0.935046	0.746817	1.14933	0.557431	0.641788	-1.16146	0.0205018
MSTRG.1307.1	1	+	137197195	137214357	intronic	2	17131	ENSRNOG00000010964	Akap13	0.615811	0.441669	2.29323	1.72638	0.554169	0.486991	0.699736	0.356019	0.358644	-1.20941	0.0205928
MSTRG.12315.1	2	+	118785836	118861454	bidirectional	2	10617	ENSRNOG00000056371	Pik3ca	1.53612	1.17403	4.76392	3.97057	1.22833	1.45968	1.62492	0.879639	0.860129	-1.08496	0.0208581
MSTRG.20020.1	6	+	135506629	135512069	intergenic	2	5252	MSTRG.20020	.	0.505092	0.363136	2.23064	2.10264	0.47942	0.47874	0.661016	0.288993	0.261136	-1.42198	0.020958
MSTRG.11540.1	19	+	49842613	49864798	intronic	2	22151	ENSRNOG00000013178	Cmip	0.711797	0.586106	3.01353	3.14561	0.54603	0.650162	1.12229	0.339252	0.386989	-1.45657	0.0213441
MSTRG.6823.1	13	+	56083115	56091531	intronic	2	8276	ENSRNOG00000011063	Dennd1b	0.716761	0.682629	2.68153	2.15956	0.611817	0.61322	1.00682	0.420283	0.319997	-1.23632	0.0215259
MSTRG.8181.1	14	-	115053316	115073528	intergenic	2	503	MSTRG.8181	.	0	0	0.218336	0.282155	0.14495	7.15298	0.076103	1.91246	0.160755	4.03799	0.0215703
ENSRNOT00000076313	2	-	8926850	8939686	processed_transcript	4	929	ENSRNOG00000016306	Adgrv1	1.34849	1.07946	4.32946	0.560432	0.011499	0.657289	0.075988	0.019372	0.548274	-2.63038	0.0215773
MSTRG.12253.1	2	+	107294808	107296355	intronic	2	1518	ENSRNOG00000011216	Tbl1xr1	0.575881	0.501622	3.04304	2.66723	0.563338	0.301372	1.01686	0.340842	0.374783	-1.54292	0.021695
MSTRG.14696.1	3	+	33084348	33107832	intergenic	2	23461	MSTRG.14696	.	0.723317	0.57948	2.25415	1.85044	0.57284	0.675757	0.817168	0.443475	0.380301	-1.0711	0.0219074
MSTRG.23912.1	9	+	117375085	117408126	intergenic	2	11856	MSTRG.23912	.	0.402001	0.458722	1.79406	2.28699	0.406546	0.389597	0.746255	0.235899	0.243156	-1.45512	0.0219645
MSTRG.3559.3	10	+	40031845	40042060	sense	3	5310	ENSRNOG00000009995	Rapgef6	1.14391	0.914263	1.80598	1.0206	0.545653	0.724774	0.086296	0.575593	0.306344	-1.30432	0.0219932
MSTRG.14511.1	3	+	12679212	12734842	antisense	2	213	ENSRNOG00000017019	Lmx1b	1.043	0	2.50374	0	0	0	0	0	0	-7.3115	0.0221683
MSTRG.17870.1	5	+	70242609	70374401	bidirectional	3	797	ENSRNOG00000055089	Slc44a1	0.000604	0	0.00235	0.373523	0	0.998771	2.3844	11.1572	0.003953	5.03161	0.0222414
MSTRG.17294.1	4	+	167872289	167887401	intronic	3	15071	ENSRNOG00000005984	Etv6	0.496134	0.399178	2.85602	2.54002	0.609564	0.494357	0.736124	0.230707	0.261579	-1.58883	0.0222919
MSTRG.11337.6	19	-	34703823	34743369	intronic	2	3085	ENSRNOG00000034007	Nr3c2	1.06424	0.92526	3.88478	4.77928	1.12907	0.818773	1.44172	0.527902	0.848267	-1.3218	0.0223982
MSTRG.32.1	1	-	2041142	2073439	intronic	2	6973	ENSRNOG00000016054	Tab2	0.68319	0.506845	2.20072	1.57324	0.494374	0.548058	0.78595	0.443921	0.377257	-1.07079	0.0224521
MSTRG.11891.3	2	-	28966203	29042796	bidirectional	4	7104	ENSRNOG00000015334	Fcho2	0.621839	0.67641	2.57029	2.30845	0.665027	0.611005	0.87131	0.566377	0.393303	-1.15665	0.0226164
MSTRG.11337.9	19	-	34703823	34740984	intronic	6	36376	ENSRNOG00000034007	Nr3c2	0.183401	0.697516	1.43006	1.86358	0.017036	0.182234	0.036559	0.383424	0.383778	-2.22696	0.0227573
MSTRG.24595.1	X	+	119148524	119155950	intergenic	3	992	MSTRG.24595	.	0.713456	1.03932	1.10517	4.79852	0.764859	0.836347	0.554136	0.432775	0.728885	-1.37556	0.022791
MSTRG.14521.1	3	+	13409164	13493455	antisense	3	4381	ENSRNOG00000022162	Pbx3	0.621548	0.440234	2.26388	1.66873	0.454405	0.551652	0.742944	0.34966	0.30111	-1.22088	0.0228873
MSTRG.21295.1	7	-	122290695	122313086	intronic	2	9297	ENSRNOG00000018803	Mkl1	0.355633	0.304902	2.1029	1.79066	0.41308	0.338487	0.590534	0.196465	0.210295	-1.53884	0.023109
MSTRG.6155.1	12	+	25269502	25272541	intronic	2	2836	ENSRNOG00000001478	Gtf2ird1	0.462823	0.385881	1.43258	1.65985	0.362424	0.393667	0.564349	0.189008	0.390946	-1.21426	0.0232115
MSTRG.24201.1	X	+	33603066	33611632	intronic	3	8324	ENSRNOG00000004971	Txlng	0.541614	0.359158	1.94221	1.47687	0.434737	0.484348	0.582128	0.28767	0.340584	-1.18184	0.0233785
MSTRG.16958.1	4	-	131644822	131693667	intronic	3	30949	ENSRNOG00000009184	Foxp1	0.554798	0.499367	3.06266	2.40591	0.679095	0.623541	0.761315	0.312558	0.307866	-1.43986	0.0235811
MSTRG.19085.1	6	+	6570424	6586815	intergenic	4	12066	MSTRG.19085	.	0.516456	0.454147	3.07978	2.93322	0.590728	0.49753	0.895102	0.433656	0.362929	-1.4878	0.023638
ENSRNOT00000093251	11	-	61492737	61493526	lincRNA	1	790	ENSRNOG00000062175	AABR07034274.1	0.409474	0.15145	1.57812	0.713166	0.377557	0.168558	0.141877	0.277735	0.098728	-1.54348	0.0237765
MSTRG.11628.2	19	-	55841792	55861505	intergenic	2	18496	MSTRG.11628	.	0.74602	0.575748	3.12435	2.93394	0.721076	0.691653	1.01344	0.408448	0.440848	-1.33379	0.0237783
MSTRG.18930.1	5	+	167618446	167674794	antisense	2	2981	ENSRNOG00000018229	Slc45a1	0.807043	0.54119	4.17144	3.66718	0.823065	0.779223	1.05289	0.273526	0.563426	-1.55185	0.0238359
MSTRG.11895.1	2	-	29147114	29153850	intergenic	2	6611	MSTRG.11895	.	0.691519	0.614411	2.35116	1.87589	0.582251	0.519542	0.931948	0.384225	0.491205	-1.0918	0.0247174
MSTRG.18005.1	5	-	98936569	98937807	intergenic	2	1025	MSTRG.18005	.	0.732333	0.376404	1.72936	2.45864	0.634861	0.422073	0.582753	0.218594	0.528088	-1.30574	0.024894
MSTRG.13586.1	20	+	4093610	4093980	intronic	2	348	ENSRNOG00000033215	RT1-Db1	1.30839	2.31829	5.17721	2.06745	1.1402	1.90513	1.30347	0.774356	0.725096	-1.06214	0.0249173
ENSRNOT00000092896	7	+	102650147	102869518	lincRNA	7	1034	ENSRNOG00000062170	AABR07058158.1	0.717924	0.480843	1.15592	0.11589	0.067558	0.250493	0	0.130403	0.127625	-2.25457	0.0251918
MSTRG.7508.1	14	-	16745694	16756190	intronic	2	6179	ENSRNOG00000002208	Shroom3	0.545782	0.618294	2.13315	2.75219	0.620522	0.607012	0.805192	0.375094	0.518142	-1.21269	0.0254714
MSTRG.17256.2	4	+	162187497	162216382	intronic	3	891	ENSRNOG00000037076	LOC689757	0.687981	1.32002	3.59057	0.357942	0	0.337035	0	0.065767	0	-4.06445	0.0255961
MSTRG.10127.1	17	-	46862218	46876353	intergenic	2	14099	MSTRG.10127	.	0.594808	0.508046	2.51303	2.12302	0.52952	0.664037	0.78152	0.43292	0.325243	-1.23381	0.0260436
MSTRG.24569.1	X	+	113974924	113983546	intronic	2	8441	ENSRNOG00000012787	Tmem164	0.731704	0.727064	3.5916	4.29619	0.785313	0.91941	1.20877	0.546059	0.564251	-1.37882	0.026255
MSTRG.8193.1	14	+	115455093	115462244	intergenic	2	481	MSTRG.8193	.	0.188688	0.05452	0.21248	0.326052	0.146681	4.61965	0.056431	1.19866	0.079081	2.73616	0.0265217
MSTRG.22409.1	8	-	78556991	78589148	intronic	2	10408	ENSRNOG00000057754	Tcf12	0.565063	0.34396	2.10032	1.93522	0.537501	0.499092	0.63087	0.233476	0.24509	-1.36512	0.0266492
MSTRG.8311.1	15	-	13422064	13510822	intergenic	2	6778	MSTRG.8311	.	0.424722	0.420516	1.52513	1.89126	0.404986	0.351976	0.687833	0.240226	0.160453	-1.37472	0.0267047
MSTRG.6947.1	13	-	78342629	78351083	intronic	2	8336	ENSRNOG00000002736	Rabgap1l	0.545398	0.535376	2.93252	2.79349	0.675881	0.545349	0.928529	0.365125	0.383952	-1.39137	0.0271177
MSTRG.10279.1	17	+	76612138	76623513	intronic	2	11356	ENSRNOG00000017882	Camk1d	0.346765	0.352841	1.55952	1.68842	0.474214	0.354909	0.481062	0.185377	0.270758	-1.31997	0.0271373
MSTRG.2904.1	1	+	266551980	266563355	intronic	2	10575	ENSRNOG00000020113	Cnnm2	0.377722	0.400191	1.40415	1.82567	0.41181	0.386596	0.575392	0.268371	0.313906	-1.19993	0.0271855
MSTRG.23316.1	9	-	43446150	43453239	intronic	2	6977	ENSRNOG00000017265	Tmem131	0.36125	0.298294	1.68713	1.13608	0.361354	0.338046	0.494378	0.193899	0.16432	-1.32555	0.0277597
MSTRG.9266.1	16	-	26519332	26558697	intergenic	3	576	MSTRG.9266	.	0.020909	0.065872	0.181222	0.143629	0.055476	0.199087	0.042271	1.57436	0.561623	2.33766	0.0277922
MSTRG.1306.5	1	+	137014171	137032277	bidirectional	2	18048	ENSRNOG00000010964	Akap13	0.830956	0.729191	3.03716	2.71491	0.693201	0.718636	1.22445	0.435984	0.525627	-1.18819	0.0279847
MSTRG.23318.1	9	-	43491370	43495986	intergenic	2	3618	ENSRNOG00000057258	AABR07067404.2	0.436797	0.418031	1.56569	1.6494	0.397153	0.350033	0.659176	0.219293	0.122814	-1.38445	0.0282535
MSTRG.5870.1	12	+	12288264	12291815	intronic	2	3075	ENSRNOG00000001007	Baiap2l1	1.01391	1.27219	4.23017	4.50166	1.38726	1.28027	1.37193	0.78181	0.799001	-1.13495	0.0282753
MSTRG.18068.1	5	-	106278728	106375901	intergenic	4	13385	ENSRNOG00000054683	RF00560	0.409058	0.287753	1.75757	1.42247	0.442599	0.262891	0.542909	0.170303	0.259582	-1.36492	0.0283728
MSTRG.15336.10	3	-	119279723	119347123	sense	16	7569	ENSRNOG00000057806	Trpm7	0.726458	0.521488	3.47613	1.72372	0.774076	0.683772	0.679307	0.394651	0.198797	-1.39736	0.0289834
MSTRG.14905.1	3	-	65905563	65907987	intergenic	2	609	MSTRG.14905	.	0.807373	0.743438	2.2102	0.274591	0.237317	0.535724	0.514673	0.228068	0.274926	-1.32737	0.0290012
MSTRG.13027.1	2	-	206668295	206672128	intronic	2	3792	ENSRNOG00000019885	Magi3	0.626002	0.92752	3.84341	4.05553	0.88051	0.804523	1.33806	0.507197	0.592998	-1.35928	0.0292574
MSTRG.7506.1	14	-	16721495	16723346	intronic	2	1721	ENSRNOG00000002208	Shroom3	0.455469	0.528008	2.105	2.30594	0.549566	0.353636	0.766242	0.348743	0.509955	-1.25226	0.0293277
MSTRG.18046.1	5	+	103487594	103513201	intronic	2	25542	ENSRNOG00000006761	Sh3gl2	0.349172	0.446879	1.0942	2.00003	0.142941	0.547927	0.352728	0.114545	0.421016	-1.47216	0.0297808
MSTRG.11959.9	2	-	39135028	39145094	intergenic	3	10015	MSTRG.11959	.	0.678028	0.675612	3.07796	3.30659	0.483331	0.762454	1.21423	0.4661	0.560305	-1.31543	0.0298393
MSTRG.14849.1	3	-	60183332	60212133	intergenic	2	28781	MSTRG.14849	.	0.797389	0.588571	3.1936	2.41102	0.616243	0.657734	1.15732	0.365131	0.398273	-1.29255	0.0299518
MSTRG.13797.1	20	+	8769653	8773477	intronic	2	3583	ENSRNOG00000059659	Zfand3	0.499997	0.470521	2.31928	1.96822	0.502708	0.474371	0.817272	0.290309	0.349612	-1.27223	0.0303945
MSTRG.18561.5	5	+	148036252	148099269	sense	7	20785	ENSRNOG00000050044	Ptp4a2	0.627191	0.598331	3.40588	1.77386	0.511643	0.781186	0.690057	0.53376	0.677594	-1.16271	0.0307549
MSTRG.10828.2	18	+	60588534	60625537	intronic	2	7204	ENSRNOG00000017610	Nedd4l	0.436223	0.398598	1.98573	2.14096	0.402154	0.446981	0.769907	0.281861	0.297847	-1.33705	0.0308317
MSTRG.19073.1	6	-	4394029	4442538	intronic	2	6473	ENSRNOG00000008479	Slc8a1	0.322454	0.301951	3.586	2.83075	0.373836	0.809743	0.60565	0.304504	0.280248	-1.72545	0.0311822
MSTRG.6656.1	13	+	43998164	44001944	intronic	2	2522	ENSRNOG00000003614	Mgat5	0.611114	0.534039	1.95543	2.06937	0.484201	0.454115	0.947832	0.262261	0.28234	-1.25459	0.0312843
MSTRG.12566.1	2	-	177897171	177946049	intronic	2	4590	ENSRNOG00000021581	Rapgef2	0.580119	0.605929	2.38246	2.54002	0.66762	0.624266	0.902282	0.327023	0.37631	-1.23887	0.0314584
MSTRG.16300.1	4	-	57586144	57643168	bidirectional	2	5781	ENSRNOG00000054042	N5	0.745879	0.62174	3.68133	3.10633	0.756851	0.786549	1.17803	0.376305	0.362091	-1.39833	0.0315522
MSTRG.19749.2	6	+	105886193	105911328	intergenic	2	25010	MSTRG.19749	.	0.499625	0.327998	1.93904	1.76775	0.405267	0.439314	0.702865	0.246832	0.218877	-1.3347	0.0315989
MSTRG.62.1	1	+	8193675	8201767	intergenic	2	5002	MSTRG.62	.	0.349455	0.256296	1.85553	1.40018	0.365439	0.308442	0.545118	0.21495	0.244778	-1.35861	0.032168
MSTRG.13191.1	2	-	226761422	226838982	antisense	2	4151	ENSRNOG00000030491	AABR07013200.1	0.360575	0.362227	1.52719	1.2833	0.391301	0.363593	0.543095	0.263875	0.2154	-1.15383	0.0326087
MSTRG.4109.2	10	-	67649047	67805382	antisense	3	327	ENSRNOG00000000236	Zfp207	0	0	0	0	0	0.314306	0	1.07547	0.007269	6.43363	0.032982
MSTRG.8907.1	15	-	106659211	106675375	intronic	2	16137	ENSRNOG00000011511	Stk24	0.509488	0.394954	1.89193	1.82887	0.455743	0.508964	0.707895	0.254415	0.240641	-1.25797	0.0330566
MSTRG.4936.1	10	+	109513022	109636157	bidirectional	3	1780	ENSRNOG00000048712	Ccdc137	0.690842	0.470686	1.64042	0.086664	0.433273	1.86203	3.03615	2.00534	3.49099	1.73278	0.033072
MSTRG.1715.11	1	-	180808327	180809642	intergenic	3	857	MSTRG.1715	.	0.843817	0.767601	0.767307	0.759708	1.15803	0.95127	1.5193	3.87913	0.576315	1.16737	0.0332131
ENSRNOT00000082491	20	-	4900092	4901178	lincRNA	2	587	ENSRNOG00000058987	AABR07044408.3	0.210272	0.469008	1.6558	1.10804	0.166166	0.148006	0.522845	0.229367	0.381214	-1.39152	0.0338157
MSTRG.20861.1	7	+	71419520	71534356	intergenic	3	278	ENSRNOG00000053902	RF00017	0	0.497468	3.15435	0	6.73714	27.5453	0.81089	19.2706	0.985619	3.75661	0.0339391
MSTRG.12817.1	2	-	194044490	194050631	intergenic	2	511	MSTRG.12817	.	0	0	0	0	0	1.03224	0	0.176386	0	6.84661	0.0339741
MSTRG.14670.1	3	-	23203554	23216990	intergenic	4	13091	MSTRG.14670	.	0.591041	0.514373	1.86633	1.99102	0.513386	0.471885	0.888321	0.359665	0.339444	-1.11465	0.0340452
MSTRG.1714.24	1	+	180882121	180947337	intergenic	4	613	MSTRG.1714	.	0.013534	0.024533	0.006311	0.529248	0.532873	0.420332	2.17703	0.033059	1.25072	2.74005	0.0341846
MSTRG.12312.2	2	-	117919844	117950571	intergenic	2	7381	MSTRG.12312	.	0.54127	0.455485	2.88094	2.68298	0.600636	0.607494	0.921094	0.377607	0.317352	-1.37693	0.0343387
MSTRG.7525.1	14	-	18038627	18069329	intronic	4	26017	ENSRNOG00000002579	Parm1	0.925152	1.07404	3.68759	4.19286	1.06467	1.13749	1.47083	0.578401	0.701052	-1.16256	0.0345442
MSTRG.21471.1	7	+	137688497	137703098	intronic	2	14566	ENSRNOG00000004831	Arid2	0.676405	0.522155	2.66217	2.13415	0.697377	0.544691	0.933133	0.391328	0.397364	-1.17746	0.0348648
MSTRG.7778.10	14	+	46517585	46688552	antisense	6	1456	ENSRNOG00000054945	AABR07015081.2	136.229	6.22788	11.1154	187.023	33.3358	4.87716	17.4232	2.01198	19.3499	-2.31321	0.0350564
MSTRG.18132.1	5	+	119610149	119632688	intergenic	2	4005	MSTRG.18132	.	0.420731	0.32815	1.35828	1.73108	0.313713	0.252211	0.713508	0.143352	0.139345	-1.45979	0.0351705
MSTRG.12567.1	2	-	177928540	178010775	antisense	2	1215	ENSRNOG00000056404	RF00026	0.237936	0.158192	1.37485	1.00852	0.241055	0.178319	0.361873	0.185377	0.047866	-1.59779	0.0352957
MSTRG.12497.2	2	-	156902303	156902812	intergenic	2	308	MSTRG.12497	.	0.780399	0.370584	0.513357	0.066418	0.907801	0.665519	1.92994	2.34622	0.307943	1.61514	0.0353488
MSTRG.2965.1	1	-	276183054	276245355	antisense	3	4389	ENSRNOG00000016265	Acsl5	0.471448	0.512044	2.36075	2.45502	0.612127	0.43432	0.899142	0.333716	0.296955	-1.33193	0.0354163
MSTRG.18012.1	5	-	93263934	93281889	intergenic	2	17934	MSTRG.18012	.	0.657059	0.375783	2.13452	2.4665	0.373547	0.683966	0.810346	0.424668	0.377225	-1.24364	0.0354539
MSTRG.23504.1	9	+	66724523	66738337	intronic	3	13661	ENSRNOG00000022066	Fam117b	0.642265	0.53982	2.60667	2.63651	0.595031	0.776303	0.911573	0.464822	0.385278	-1.20118	0.0354911
MSTRG.24207.1	X	+	34306570	34397014	intergenic	2	29585	ENSRNOG00000056404	RF00026	0.459999	0.401822	2.30484	2.58433	0.53868	0.544866	0.795101	0.274591	0.2995	-1.391	0.0355543
MSTRG.18068.2	5	-	106318947	106329677	intergenic	3	4696	ENSRNOG00000054683	RF00560	0.156846	0.27706	1.43337	1.09862	0.231289	0.228898	0.444071	0.177616	0.154699	-1.42106	0.035794
MSTRG.1100.1	1	-	100967254	101010794	sense	7	4551	ENSRNOG00000056946	Scaf1	1.16388	0.988684	2.5227	2.45565	0.563389	0.954418	1.41061	0.359777	0.703258	-1.01041	0.0360412
MSTRG.16930.1	4	-	126291224	126356213	intergenic	2	1449	MSTRG.16930	.	1.23994	1.2493	4.50324	5.99127	1.54156	1.17292	1.87216	0.954412	0.531348	-1.26065	0.0360415
MSTRG.19991.5	6	+	136041299	136055158	bidirectional	2	13745	ENSRNOG00000010330	Mark3	0.616457	0.523135	2.12059	1.9566	0.561881	0.559662	0.866432	0.316918	0.42625	-1.0982	0.0360483
MSTRG.17067.1	4	+	148289473	148300233	intronic	2	10601	ENSRNOG00000012297	43898	0.449645	0.504474	1.66033	1.71799	0.490629	0.468121	0.720748	0.298754	0.316983	-1.08238	0.0362892
MSTRG.12308.2	2	-	117818701	117919524	intergenic	3	22727	MSTRG.12308	.	0.545914	0.489897	1.76168	2.56087	0.717898	0.68213	0.511128	0.386939	0.4263	-1.14029	0.0365943
MSTRG.7762.1	14	+	58218996	58275419	intergenic	2	1282	MSTRG.7762	.	0.299503	0.28922	0.863523	2.47137	0.926131	12.7137	0.933492	2.28515	1.79961	2.06666	0.0368124
MSTRG.14929.9	3	+	68102910	68103172	intergenic	2	222	MSTRG.14929	.	0	0	0	0	0	0	0	0.75792	1.757	6.73173	0.037102
MSTRG.21052.1	7	-	108950599	109011933	intergenic	3	2435	MSTRG.21052	.	0.424032	0.157955	1.54347	1.54363	0.240546	0.359281	0.511508	0.164181	0.255149	-1.41925	0.0371121
MSTRG.24158.1	X	-	25773545	25788606	intergenic	2	14678	MSTRG.24158	.	0.40354	0.280143	1.32109	1.59396	0.392256	0.274924	0.575771	0.261155	0.247568	-1.20183	0.0371629
MSTRG.5475.10	11	-	79647284	79710242	bidirectional	2	34597	ENSRNOG00000031669	Lpp	0.507675	0.374549	1.56538	1.71487	0.483578	0.420679	0.664034	0.269682	0.331294	-1.10461	0.0372229
MSTRG.15023.1	3	+	81137445	81181213	antisense	2	10271	ENSRNOG00000056958	RF00412	0.510196	0.309025	1.98492	1.84825	0.592488	0.437099	0.591204	0.265578	0.236288	-1.29077	0.0374585
MSTRG.95.28	1	-	11905571	11963239	intergenic	5	8441	ENSRNOG00000056963	RF00002	5.6892	3.64718	37.0053	12.2768	4.88339	1.81642	5.79362	5.15851	6.01866	-1.45593	0.0376782
MSTRG.12076.1	2	-	57645881	57651112	intergenic	2	5188	MSTRG.12076	.	0.588963	0.52855	2.73718	1.91384	0.415405	0.563759	1.03089	0.37313	0.333333	-1.24982	0.0377319
MSTRG.6381.1	12	-	43604707	43613281	intergenic	2	8471	MSTRG.6381	.	0.434097	0.403383	1.66235	1.48681	0.464498	0.385163	0.647611	0.297026	0.317472	-1.07931	0.0378534
MSTRG.1309.2	1	-	137414525	137427299	intergenic	4	1672	MSTRG.1309	.	1.16102	0.299576	2.02421	1.23669	0.620089	0.060071	0.024248	0.498699	0.170273	-1.9295	0.0378839
MSTRG.7505.1	14	-	16714147	16763349	intronic	2	7038	ENSRNOG00000002208	Shroom3	0.521069	0.638109	1.92976	2.21723	0.420639	0.477928	0.980319	0.358422	0.51276	-1.1163	0.0381335
MSTRG.18385.1	5	+	138365613	138368211	intronic	2	300	ENSRNOG00000008560	AABR07049790.1	1.18078	0.342693	1.07976	2.20025	0.040592	0.485222	0.389031	0.425044	0.582365	-1.46521	0.0381603
MSTRG.1249.1	1	-	124782068	124795782	intronic	2	13687	ENSRNOG00000015822	Klf13	0.453956	0.374462	1.90774	1.45413	0.399303	0.440512	0.698617	0.270611	0.245217	-1.19174	0.038602
MSTRG.23828.2	9	-	101106892	101388833	bidirectional	2	849	ENSRNOG00000051180	Chchd2	0	0.504718	0	0	0	0	33.0897	0	15.2605	6.31503	0.0393799
MSTRG.19695.1	6	-	101277522	101282759	intergenic	2	582	MSTRG.19695	.	1.25724	1.30396	1.02327	0.728482	1.13147	1.338	3.26307	7.26489	0.670484	1.45765	0.0395583
MSTRG.123.2	1	-	19354751	19376301	sense	2	1010	ENSRNOG00000011245	Arhgap18	0.440783	0.577664	1.10408	1.81706	0.355582	0.595464	0.649495	0.240819	0.237858	-1.09438	0.039569
MSTRG.12433.1	2	-	147574099	147693082	sense	7	4423	ENSRNOG00000016617	Wwtr1	0.763293	0.852129	0.576934	0.269943	0.867178	0.848328	0.834895	0.819077	2.99501	1.17911	0.0397278
MSTRG.7509.1	14	-	16753210	16757609	intronic	2	910	ENSRNOG00000002208	Shroom3	0.597404	0.617172	1.58617	2.10324	0.471905	0.621085	0.865211	0.224014	0.361285	-1.11297	0.0402424
MSTRG.22355.7	8	-	72257939	72270350	bidirectional	2	12336	ENSRNOG00000017714	Usp3	0.917262	0.683033	3.18262	3.21836	0.959651	0.877843	1.18664	0.533325	0.567481	-1.11909	0.0404226
MSTRG.1297.1	1	-	134857432	134860924	intronic	2	3415	ENSRNOG00000012716	Chd2	1.15774	0.968263	5.51546	4.18491	1.18625	1.06588	1.89406	0.787496	0.804059	-1.20341	0.040741
MSTRG.8289.8	15	-	9202102	9241591	intergenic	2	39155	MSTRG.8289	.	0.557475	0.567782	2.16286	2.85107	0.61163	0.559101	1.0239	0.330124	0.352472	-1.25915	0.0407547
MSTRG.7047.1	13	-	86496637	86524459	intergenic	2	21726	MSTRG.7047	.	0.427836	0.456872	1.79623	2.11617	0.562976	0.509801	0.686565	0.289233	0.325053	-1.17887	0.0410032
MSTRG.5699.1	12	+	1877193	2019684	antisense	4	7029	ENSRNOG00000028100	Pex11g	0.406956	0.256847	1.48002	1.38412	0.326256	0.32378	0.591574	0.25074	0.238811	-1.18888	0.0410759
MSTRG.10261.1	17	+	72254969	72295995	intronic	2	5189	ENSRNOG00000019223	Atp5f1c	0.318145	0.189631	1.47075	1.76228	0.398587	0.244392	0.516152	0.166503	0.11414	-1.53388	0.0413102
MSTRG.14945.1	3	-	72030781	72046252	intronic	3	15430	ENSRNOG00000030790	Ctnnd1	1.62133	1.27938	6.26778	6.7249	1.63811	1.4364	2.6277	0.871363	0.921444	-1.24777	0.0414365
MSTRG.280.1	1	+	46400516	46403433	intronic	2	2763	ENSRNOG00000029049	Zdhhc14	0.313144	0.305619	1.93244	1.51816	0.350188	0.365728	0.633559	0.196717	0.218838	-1.36261	0.0416146
MSTRG.22933.1	8	+	130772567	130789270	intronic	3	8624	ENSRNOG00000004050	Snrk	0.758606	0.730308	2.50383	2.47733	0.718135	0.665118	1.18365	0.50091	0.527236	-1.01452	0.0416218
MSTRG.10671.3	18	-	36274200	36285444	bidirectional	2	11012	ENSRNOG00000054049	Prelid2	0.682121	0.436814	1.75131	2.38775	0.486132	0.515599	0.916815	0.415911	0.435097	-1.09177	0.0416613
MSTRG.13297.1	2	+	241921834	241987427	intronic	3	13957	ENSRNOG00000009882	Ppp3ca	0.778884	0.573325	3.43212	3.06203	0.690722	0.72504	1.31014	0.42044	0.448019	-1.28848	0.0417051
MSTRG.13917.1	20	+	15483859	15486140	intergenic	2	487	MSTRG.13917	.	0.385256	0	0.579616	0.471952	2.77444	1.10133	0.495887	0.434618	2.29405	2.14957	0.0421335
MSTRG.20880.1	7	-	73662600	73683981	intronic	2	21280	ENSRNOG00000011278	Stk3	0.65112	0.388909	2.54859	2.87832	0.555707	0.518409	1.05282	0.393556	0.389877	-1.31403	0.0422117
MSTRG.13299.1	2	+	242061121	242067476	intronic	2	6323	ENSRNOG00000009882	Ppp3ca	0.392106	0.347754	2.37815	2.15176	0.57472	0.393734	0.743091	0.256449	0.215819	-1.42835	0.0422372
MSTRG.2617.1	1	-	242408700	242432238	intronic	2	23390	ENSRNOG00000015232	Pip5k1b	0.87791	0.705038	3.18524	3.85412	0.832379	0.777796	1.46488	0.549926	0.542144	-1.21393	0.0423066
MSTRG.6949.1	13	-	78486924	78488944	intronic	2	756	ENSRNOG00000002736	Rabgap1l	0.25193	0.164112	1.2985	1.74106	0.174961	0.115508	0.528619	0.141067	0.294767	-1.60447	0.0423857
MSTRG.8386.1	15	+	24282361	24299524	intronic	2	17036	ENSRNOG00000053146	RF00003	0.502746	0.434637	2.09191	1.83754	0.467788	0.497168	0.831462	0.327003	0.273886	-1.18564	0.0426425
MSTRG.13040.1	2	+	207421624	207426647	intronic	2	4960	ENSRNOG00000014002	St7l	0.496925	0.568212	1.72852	1.53134	0.528138	0.376523	0.827727	0.373754	0.277276	-1.0264	0.0426543
MSTRG.16030.1	4	+	6830335	6837302	intronic	2	4265	ENSRNOG00000050578	Rheb	0.422661	0.480695	2.40892	1.54471	0.59804	0.411001	0.629839	0.153336	0.425136	-1.28476	0.0430756
MSTRG.20786.1	7	+	66632891	66637953	intronic	2	4940	ENSRNOG00000023202	Usp15	0.551244	0.380031	1.98816	1.71491	0.448139	0.549082	0.735526	0.201577	0.312129	-1.20818	0.0433008
MSTRG.13496.1	20	-	2643406	2650116	intergenic	4	1674	MSTRG.13496	.	0.799536	0.616	2.13457	1.70744	0.526534	0.19558	0.969123	0.663996	0.330626	-1.13427	0.0433416
MSTRG.9783.4	17	+	13507343	13517816	sense	4	1113	ENSRNOG00000013679	Sema4d	1.40016	0.93859	5.69174	0.445734	0.41738	0.143035	0	0	0.432878	-3.21932	0.0434317
MSTRG.16343.1	4	-	62614691	62617424	intronic	2	2065	ENSRNOG00000010795	Cnot4	0.39868	0.488564	1.70987	0.890613	0.356085	0.329754	0.687215	0.185276	0.193288	-1.15731	0.043482
MSTRG.2756.5	1	+	257157312	257165764	bidirectional	2	8396	ENSRNOG00000014276	Plce1	0.613309	0.506161	1.83492	2.25312	0.558074	0.618245	0.851614	0.402854	0.435941	-1.02833	0.0436209
MSTRG.4734.14	10	-	96538181	96557878	intronic	2	15052	ENSRNOG00000003491	Prkca	0.41108	0.347795	1.83347	4.0375	0.537616	0.740635	0.706035	0.260402	0.325553	-1.53211	0.0438793
MSTRG.16956.1	4	-	131570367	131580165	intronic	2	9646	ENSRNOG00000009184	Foxp1	0.456847	0.439252	2.74097	2.18697	0.582066	0.559581	0.843161	0.236223	0.327605	-1.35036	0.0439409
MSTRG.18754.4	5	+	156343592	156372644	intergenic	3	28487	MSTRG.18754	.	0.586506	0.432023	2.49474	2.26448	0.576287	0.517301	0.947463	0.308586	0.395117	-1.23474	0.0442081
MSTRG.15872.1	3	+	166195745	166197256	intergenic	2	293	MSTRG.15872	.	0.639024	0.146098	0.827638	0.196062	0.667304	0.93974	4.76993	0.366932	0.567377	1.80564	0.0442138
MSTRG.13799.1	20	+	8848625	8854603	intronic	2	5954	ENSRNOG00000059659	Zfand3	0.400461	0.302143	1.8026	1.79426	0.329275	0.465672	0.652654	0.205003	0.333605	-1.27523	0.0443949
MSTRG.4734.13	10	-	96501071	96585308	sense	4	24585	ENSRNOG00000003491	Prkca	1.179	0.841714	4.20876	5.05918	1.09022	1.13391	1.70333	0.301864	0.667364	-1.36839	0.0444715
MSTRG.12004.1	2	+	45952842	45968992	intronic	2	7364	ENSRNOG00000011105	Arl15	0.314453	0.213211	1.32496	1.47822	0.332269	0.27232	0.529262	0.146404	0.153683	-1.37632	0.044602
MSTRG.6942.1	13	-	78015194	78036426	intronic	2	16984	ENSRNOG00000002736	Rabgap1l	0.347134	0.302294	1.13859	2.18141	0.391242	0.456538	0.53522	0.195183	0.188364	-1.33541	0.0450354
ENSRNOT00000024327	2	+	26471173	26471584	processed_pseudogene	2	349	ENSRNOG00000018068	Ndufs6	0.683492	0.306435	0.212454	0.113996	0.783885	1.20882	0.174647	0.656307	0.964593	1.32317	0.0451449
MSTRG.4736.1	10	-	96349672	96368850	intronic	3	19005	ENSRNOG00000003491	Prkca	0.541086	0.451438	2.41889	2.40871	0.619134	0.659668	0.828143	0.314958	0.369331	-1.22204	0.0454871
MSTRG.8019.2	14	+	86357933	86447932	antisense	2	2201	ENSRNOG00000004670	Ddx56	0.721696	0.818439	3.25504	2.36942	0.713732	0.738051	1.30187	0.490141	0.324174	-1.17094	0.0456458
MSTRG.18072.1	5	-	106339738	106386101	intergenic	2	1099	MSTRG.18072	.	0.408971	0.454496	3.90683	3.12859	0.484936	0.609154	0.982704	0.341069	0.742348	-1.47068	0.0457328
MSTRG.5793.1	12	-	9316340	9375498	antisense	2	1452	ENSRNOG00000054764	Flt3	0.656928	0.511501	2.11126	1.92263	0.567434	0.646129	0.76924	0.582539	0.244381	-1.05434	0.0458798
MSTRG.12312.1	2	-	117919810	117938161	intergenic	3	17694	MSTRG.12312	.	0.555571	0.551686	2.94907	3.03793	0.629658	0.670921	1.13845	0.413119	0.38925	-1.29272	0.0461037
MSTRG.4737.1	10	-	96381590	96402263	intronic	2	9747	ENSRNOG00000003491	Prkca	0.696967	0.695681	3.28253	3.28168	0.876171	0.884151	1.17613	0.387008	0.419203	-1.25087	0.0467115
MSTRG.11117.1	19	+	18120262	18134702	intronic	3	14395	ENSRNOG00000028649	Tox3	0.609275	0.442576	2.36733	2.99984	0.633295	0.556653	1.0474	0.35255	0.324263	-1.30287	0.0468588
MSTRG.20019.1	6	+	135500032	135506579	intergenic	2	6425	MSTRG.20019	.	0.432951	0.3587	2.52059	2.05722	0.494704	0.580988	0.753085	0.321781	0.281922	-1.3013	0.0470915
MSTRG.22914.2	8	+	130508964	130529483	intergenic	5	4042	MSTRG.22914	.	0.729826	0.68722	2.65455	3.24315	0.429074	0.894799	1.31105	0.416788	0.422887	-1.2438	0.0471054
MSTRG.2722.1	1	+	254201095	254203259	intergenic	2	376	MSTRG.2722	.	0.678054	0	0.497666	0.80642	4.45562	1.75606	1.31863	0.197031	3.13202	2.27534	0.0471287
MSTRG.13689.1	20	+	5335862	5419295	antisense	3	696	ENSRNOG00000061996	AABR07044420.1	6.43259	2.18149	4.97841	4.91506	3.33858	0.307389	2.39772	1.3133	1.14011	-1.29115	0.0476459
MSTRG.16031.1	4	+	6837576	6916636	antisense	2	7240	ENSRNOG00000056404	RF00026	0.513589	0.391678	1.9886	1.75456	0.549409	0.495865	0.724088	0.305908	0.208439	-1.18761	0.0479206
MSTRG.15509.3	3	-	140445385	140483016	bidirectional	2	37590	ENSRNOG00000036964	Ralgapa2	0.642896	0.515932	2.87975	3.21397	0.778163	0.672386	1.10441	0.422553	0.378278	-1.27382	0.0480225
MSTRG.7651.4	14	-	37807313	37885161	bidirectional	2	7812	ENSRNOG00000002271	Slain2	0.952508	0.836423	2.96018	3.14637	0.888131	1.00375	1.34798	0.617415	0.444701	-1.04472	0.0480785
MSTRG.7659.1	14	+	37612104	37616725	intronic	2	4594	ENSRNOG00000002248	Fryl	0.613947	0.466319	2.51148	3.05119	0.507442	0.673943	1.10203	0.407236	0.428306	-1.25456	0.0485631
MSTRG.21464.1	7	+	136102804	136105328	intergenic	2	2495	MSTRG.21464	.	0.392531	0.310057	2.03883	2.36776	0.419075	0.50985	0.72482	0.260356	0.36965	-1.32006	0.0491416
MSTRG.24486.1	X	+	100394121	100402716	intergenic	2	8434	MSTRG.24486	.	0.463599	0.333332	1.23101	1.56304	0.48067	0.374856	0.59464	0.246354	0.230517	-1.06407	0.0493406
MSTRG.21050.1	7	-	108928585	109006822	intergenic	2	16238	MSTRG.21050	.	0.379625	0.226189	1.71011	2.28835	0.291167	0.418231	0.742935	0.228852	0.215247	-1.4433	0.0496978
ENSRNOT00000087728	1	-	43563457	43563998	antisense	1	542	ENSRNOG00000059866	AABR07001432.1	0.986133	0.318156	2.48084	0.23839	0	0.474127	0.188976	0.162172	0.234082	-2.08258	0.0498372

## Sheet: circRNA.diff
CircRNA_id	gene	K1_Count	K2_Count	K3_Count	K4_Count	M1_Count	M2_Count	M3_Count	M4_Count	M5_Count	log2FoldChange	pvalue
1:201628878-201642525+	AABR07005821.1	151	130	95	178	0	64	0	109	0	-4.52679	5.30925e-26
13:113908902-113915568-	Cr2	48	49	110	6	0	7	0	0	0	-4.61508	6.72001e-10
2:88217226-88217906+	Car1	781	0	0	0	0	0	0	0	0	-2.40276	0.000882917
17:81177594-81187710-	Hacd1	0	2	0	0	5	6	2	13	11	2.47768	0.00155862
11:89175424-89180448-	Spidr	26	35	20	14	60	51	20	67	56	1.03276	0.00201565
14:60580465-60586776-	Pi4k2b	0	0	0	0	5	6	7	6	0	2.23993	0.00264778
2:22950022-22964734+	Homer1	9	22	7	1	16	21	29	27	25	1.63094	0.00354445
6:104828873-104846483+	Smoc1	7	3	3	1	0	0	0	0	0	-2	0.00400442
X:156471236-156473961+	Flna	0	245	0	0	0	0	0	0	0	-1.98563	0.0042162
12:51937845-51945222+	Pus1	4	11	3	0	0	0	0	0	0	-1.97672	0.00435267
8:119447347-119465058+	Lrrfip2	0	0	0	0	0	43	0	0	30	2.08273	0.00457769
5:20023663-20042872-	Tox	5	4	0	5	15	3	20	25	18	1.99517	0.00480508
1:137173178-137179777+	Akap13	1	6	4	2	0	0	0	0	0	-1.92856	0.00516561
20:14319169-14348042-	Specc1l	0	0	0	0	4	0	5	6	4	2.00723	0.00590126
2:24067947-24073884+	Ap3b1	15	14	0	5	0	0	0	5	0	-2.10597	0.00594908
13:106507145-106507561+	Esrrg	12	25	3	10	22	27	30	24	32	1.32959	0.00742842
10:110680098-110690679+	Tbcd	0	29	0	0	23	13	0	23	10	2.06062	0.00754468
9:99266782-99267021-	Hdac4	4	3	3	7	13	12	12	19	29	1.75693	0.00760653
15:1734705-1753492-	no_found_gene	0	1	5	0	15	7	5	7	4	2.08514	0.00787172
14:2944121-2955913+	Evi5	3	11	0	2	0	0	0	0	0	-1.79248	0.00830251
3:148674740-148676002+	Tm9sf4	0	0	3	0	11	0	5	4	14	1.97975	0.0107155
13:73239821-73265813+	Acbd6	13	34	7	0	12	24	18	30	24	1.4539	0.0112004
15:109127706-109141568+	Pcca	5	3	6	9	3	0	2	0	0	-1.96157	0.0113899
1:136685583-136699335-	AC126641.1	5	5	2	0	0	0	0	0	0	-1.68872	0.0118151
19:22158620-22179584-	Phkb	0	9	0	0	7	4	6	14	3	1.97675	0.0118595
3:21844718-21877487-	Strbp	0	9	0	7	4	7	13	17	15	1.87936	0.0122465
9:20826560-20834954+	Cd2ap	0	7	0	0	2	14	10	7	2	1.95725	0.0126177
17:20098291-20109613+	Dtnbp1	0	0	0	0	0	7	3	6	1	1.76147	0.0130181
3:113308253-113308633-	Ppip5k1	0	0	0	0	6	1	0	3	7	1.76147	0.0130181
15:57348404-57351717+	Zc3h13	3	3	5	0	0	0	0	0	0	-1.64624	0.013621
12:2144452-2145584+	Camsap3	0	0	0	0	2	6	4	0	3	1.74285	0.0137941
14:37238504-37262083-	Dcun1d4	0	15	14	13	0	0	10	0	2	-1.91968	0.0144727
12:13716854-13717310+	Actb	0	87	0	0	0	0	0	0	0	-1.61486	0.0151177
2:206534103-206536360-	Magi3	18	0	0	0	10	5	18	22	0	1.90119	0.0151998
6:124651884-124677509-	Rps6ka5	5	1	0	7	4	8	4	31	21	1.8084	0.0155646
1:101116840-101117163-	Rps11	0	0	0	0	0	4	0	8	7	1.69837	0.0158227
19:29664469-29671928-	Inpp4b	2	6	3	0	0	0	0	0	0	-1.59808	0.0159797
2:4143949-4174344-	Slf1	0	0	0	0	4	1	0	4	6	1.69024	0.0162217
3:172526112-172526617+	Nelfcd	0	4	1	7	0	0	0	0	0	-1.58048	0.016933
1:176425742-176449232-	Galnt18	1	3	1	4	0	0	0	0	0	-1.58048	0.016933
8:128807473-128808790+	Rpsa	2	5	3	3	0	0	0	2	0	-1.72549	0.0172779
9:11202670-11219449-	Uxs1	5	11	0	0	0	0	0	0	0	-1.54248	0.0191759
14:106492369-106500203+	Wdpcp	0	0	8	7	0	0	0	0	0	-1.54248	0.0191759
8:117438984-117441595-	Arih2	3	8	0	1	0	0	0	0	0	-1.54248	0.0191759
11:47103833-47105670-	Zbtb11	0	0	0	0	3	2	0	7	2	1.63399	0.0192479
2:226925636-226942478+	Pde5a	0	0	0	0	2	5	1	3	1	1.63399	0.0192479
9:2205171-2210996+	Satb1	1	12	16	10	0	7	0	9	0	-1.79745	0.0219435
17:16141477-16143144+	Fam120a	1	0	0	0	4	10	4	2	0	1.68765	0.0222788
13:98351512-98365181+	Cdc42bpa	0	0	0	0	1	4	1	1	5	1.58138	0.0225394
12:19088214-19089820-	Cyp3a9	0	0	0	0	1	1	4	2	3	1.58138	0.0225394
2:238543064-238577394+	Ppa2	14	25	5	0	8	18	14	29	25	1.38834	0.0236128
17:33515857-33659382+	Gmds	9	5	0	0	0	0	0	0	0	-1.47672	0.0237238
16:50437204-50437519-	Fat1	0	11	4	0	0	0	0	0	0	-1.47672	0.0237238
4:10770202-10777395+	Rsbn1l	4	3	2	0	0	0	0	0	0	-1.47672	0.0237238
4:180610927-180613165-	Itpr2	3	4	2	0	0	0	0	0	0	-1.47672	0.0237238
13:89611031-89618472-	Ndufs2	0	55	0	0	0	0	0	0	0	-1.45184	0.0256929
1:282151346-282155817-	Eif3a	7	6	0	0	0	0	0	0	0	-1.45184	0.0256929
3:112713523-112752649-	Ttbk2	0	0	2	0	2	3	2	5	5	1.67173	0.0265921
13:77861166-77863480-	Tnn	5	0	2	2	0	0	0	0	0	-1.43872	0.026791
6:22033341-22038870-	Birc6	4	9	0	1	12	9	5	12	9	1.66498	0.0272302
7:126667193-126669197+	Ppara	0	0	0	0	5	0	7	1	1	1.51699	0.0272703
8:117332210-117333100+	Qrich1	4	3	5	0	0	1	0	0	0	-1.52672	0.027643
1:201639278-201642525+	AABR07005821.1	0	3	2	9	0	1	0	0	0	-1.52672	0.027643
1:204773089-204780713-	Fam53b	3	5	4	0	0	1	0	0	0	-1.52672	0.027643
9:45203454-45205627-	Aff3	5	15	13	6	3	7	0	3	1	-1.69992	0.0277228
10:72203090-72212546+	Myo19	0	0	51	0	0	0	0	0	0	-1.42511	0.0279766
13:82739353-82743503-	Atp1b1	0	5	0	4	5	9	6	8	6	1.71158	0.0284612
20:45512673-45553536+	Cdk19	0	0	5	0	0	10	5	9	4	1.69141	0.0290739
2:206964920-206976810-	Lrig2	0	0	0	0	0	6	0	3	5	1.47846	0.0305221
20:13906483-13912191+	Cabin1	2	2	5	1	0	0	0	1	0	-1.48872	0.0310555
6:59988432-59994622-	Scin	0	45	0	0	0	0	0	0	0	-1.38089	0.0321728
1:191971117-191975867-	Gga2	4	0	2	2	0	0	0	0	0	-1.37296	0.0329841
16:50483767-50487053-	Fat1	10	8	8	0	12	15	11	26	9	1.42262	0.0334513
18:72571324-72597936+	Smad2	0	0	0	0	4	0	0	4	5	1.44576	0.0335579
18:69634005-69647714-	Smad4	4	3	0	4	0	0	0	0	1	-1.46096	0.0337855
9:81529563-81537291+	Arpc2	43	0	0	0	0	0	0	0	0	-1.36486	0.0338332
1:185263913-185267832+	Pik3c2a	0	2	0	0	0	3	5	7	4	1.58514	0.0342684
15:25320487-25335135+	Tmem260	0	0	0	0	2	0	1	7	2	1.43399	0.0347177
16:2115373-2126628-	Slmap	0	0	0	0	0	0	3	3	8	1.43399	0.0347177
13:110049190-110052621-	Ppp2r5a	9	15	12	14	3	4	5	8	1	-1.51695	0.0350834
1:80655200-80655563-	Nectin2	2	6	1	0	0	0	0	0	0	-1.34808	0.0356556
9:66618609-66620541+	Bmpr2	0	10	5	2	1	0	1	0	0	-1.50734	0.0370346
4:118870970-118878395+	Gfpt1	10	18	5	2	22	14	11	27	18	1.24482	0.0370743
9:88630023-88653711+	Agfg1	7	5	0	2	0	0	2	0	0	-1.47549	0.0372726
10:95847282-95848214+	Helz	4	3	0	1	0	0	0	0	0	-1.33048	0.0376641
16:1859418-1869407+	Zmiz1	1	4	1	1	0	0	0	0	0	-1.33048	0.0376641
4:99970320-99980034+	St3gal5	1	3	0	4	0	0	0	0	0	-1.33048	0.0376641
17:1059416-1065593-	Ptch1	4	11	2	7	3	0	0	0	7	-1.62296	0.0378277
1:17740071-17740365-	Ptprk	4	0	8	1	0	1	0	0	0	-1.42296	0.0378759
6:108862382-108883917+	Ylpm1	0	0	0	0	0	0	2	6	5	1.39546	0.0387744
8:84761540-84793175-	Lrrc1	0	0	0	0	2	0	2	1	6	1.39546	0.0387744
20:38982301-38982463-	Serinc1	0	0	0	0	7	0	0	0	14	1.38138	0.0403623
6:106763697-106798058-	Dpf3	0	0	0	0	0	4	1	5	1	1.38138	0.0403623
1:220015522-220016193+	Rbm4b	0	6	3	0	5	3	8	5	12	1.60622	0.0404304
13:103356834-103362959+	Eprs	2	3	0	6	0	1	0	0	0	-1.39808	0.0407921
1:78518318-78522187-	Arhgap35	10	11	1	1	0	3	0	0	2	-1.54411	0.0425592
17:19160993-19417560+	no_found_gene	1	6	1	0	8	6	6	8	3	1.58907	0.0426751
6:54539886-54541455+	Snx13	4	3	0	3	0	0	0	1	0	-1.38048	0.0429753
4:125762256-125764188-	Magi1	1	1	3	4	0	0	0	1	0	-1.38048	0.0429753
18:59207483-59245202+	Wdr7	3	4	1	1	0	0	0	0	1	-1.38048	0.0429753
5:14305875-14314250-	Atp6v1h	0	0	0	0	1	0	0	10	4	1.35627	0.0433433
1:21160904-21211619+	Akap7	5	3	5	2	0	4	1	0	0	-1.52434	0.0436536
7:64024697-64033477-	Srgap1	13	14	0	0	0	0	4	0	0	-1.46418	0.0446045
10:108971031-108982577+	Rptor	4	4	2	0	0	1	0	0	0	-1.3572	0.0460251
3:2131730-2132285-	Arrdc1	0	0	1	0	2	1	0	7	6	1.42846	0.0469652
7:41167311-41167751+	Atp2b1	0	1	1	0	2	3	3	6	2	1.49546	0.0474693
10:1491890-1493208+	Bfar	0	2	7	2	0	0	0	0	1	-1.34248	0.0480535
16:19744862-19745327+	Myo9b	3	2	2	1	0	0	1	0	0	-1.34248	0.0480535
15:41086580-41089764+	Mipep	3	3	1	0	0	0	0	0	0	-1.25	0.0482522
13:77863216-77865781-	Tnn	0	3	7	0	0	0	0	0	0	-1.25	0.0482522
15:18815887-18819235-	Flnb	0	0	0	0	3	0	5	3	0	1.31699	0.0484153
1:56289123-56315740+	Smoc2	0	0	0	0	2	1	1	1	3	1.31699	0.0484153
