# Supplementary material for: Comparative Transcriptome Analysis Reveals Relationship among mRNAs, lncRNAs, and circRNAs of Slow Transit Constipation
Source: Biomed Res Int. 2021 Aug 23;2021:6672899. doi: 10.1155/2021/6672899 (PMC8427675; doi:10.1155/2021/6672899)
Supplement: Supplementary 2 — Table S2: a total of 109 possible cis-regulatory relationships were identified. [file 6672899.f2.xlsx]

## Sheet: cis_target
lnc_Transcript	lnc_Diff	lnc_Chr	lnc_Start	lnc_End	lnc_GeneId	lnc_GeneName	m_Transcript	m_Diff	m_Chr	m_Start	m_End	m_GeneId	m_GeneName
MSTRG.8688.1	down	15	48057490	48061664	ENSRNOG00000013089	Kif13b	ENSRNOT00000029757	up	15	48031074	48189753	ENSRNOG00000013089	Kif13b
MSTRG.8688.1	down	15	48057490	48061664	ENSRNOG00000013089	Kif13b	ENSRNOT00000085487	up	15	48030973	48189951	ENSRNOG00000013089	Kif13b
MSTRG.8674.1	up	15	46693383	46775764	ENSRNOG00000011560	Mtmr9	ENSRNOT00000015021	down	15	46555188	46593653	ENSRNOG00000010798	Blk
MSTRG.13000.2	down	2	205483692	205519370	ENSRNOG00000054886	RF00100	ENSRNOT00000039572	down	2	205553163	205560791	ENSRNOG00000023079	Nras
MSTRG.13000.2	down	2	205483692	205519370	ENSRNOG00000054886	RF00100	MSTRG.13004.7	up	2	205516246	205543160	ENSRNOG00000061058	Csde1
MSTRG.13000.2	down	2	205483692	205519370	ENSRNOG00000054886	RF00100	ENSRNOT00000025365	up	2	205617220	205660611	ENSRNOG00000018716	Dennd2c
ENSRNOT00000093154	down	2	186776605	186808078	ENSRNOG00000043414	Fcrl5	ENSRNOT00000093342	down	2	186703541	186724205	ENSRNOG00000034230	Fcrl1
ENSRNOT00000093154	down	2	186776605	186808078	ENSRNOG00000043414	Fcrl5	ENSRNOT00000057022	down	2	186685104	186696117	ENSRNOG00000023068	Cd5l
MSTRG.13065.1	down	2	209094983	209102540	ENSRNOG00000017680	Dennd2d	ENSRNOT00000023903	up	2	209161047	209188622	ENSRNOG00000017744	Dram2
MSTRG.13065.2	down	2	209094983	209101317	ENSRNOG00000017680	Dennd2d	ENSRNOT00000023903	up	2	209161047	209188622	ENSRNOG00000017744	Dram2
MSTRG.11891.3	down	2	28966203	29042796	ENSRNOG00000015334	Fcho2	ENSRNOT00000020543	up	2	29056219	29121104	ENSRNOG00000014999	Tnpo1
MSTRG.13191.1	down	2	226761422	226838982	ENSRNOG00000030491	AABR07013200.1	MSTRG.13187.3	up	2	226632888	226679438	ENSRNOG00000013737	Bcar3
MSTRG.11895.1	down	2	29147114	29153850	MSTRG.11895	.	ENSRNOT00000020543	up	2	29056219	29121104	ENSRNOG00000014999	Tnpo1
MSTRG.13000.4	up	2	205483831	205516111	ENSRNOG00000054886	RF00100	ENSRNOT00000039572	down	2	205553163	205560791	ENSRNOG00000023079	Nras
MSTRG.13000.4	up	2	205483831	205516111	ENSRNOG00000054886	RF00100	MSTRG.13004.7	up	2	205516246	205543160	ENSRNOG00000061058	Csde1
MSTRG.12433.1	up	2	147574099	147693082	ENSRNOG00000016617	Wwtr1	ENSRNOT00000022778	up	2	147774767	147779013	ENSRNOG00000043386	Commd2
ENSRNOT00000087728	down	1	43563457	43563998	ENSRNOG00000059866	AABR07001432.1	ENSRNOT00000024460	down	1	43567842	43638161	ENSRNOG00000018163	Ipcef1
MSTRG.17391.1	down	4	179442213	179445644	ENSRNOG00000027630	Casc1	ENSRNOT00000012588	up	4	179491129	179512471	ENSRNOG00000009338	Kras
MSTRG.17391.1	down	4	179442213	179445644	ENSRNOG00000027630	Casc1	ENSRNOT00000012887	up	4	179486105	179515558	ENSRNOG00000009338	Kras
MSTRG.16096.9	down	4	14039916	14071176	ENSRNOG00000040108	RGD1565355	MSTRG.16096.18	down	4	14143389	14235210	ENSRNOG00000040108	RGD1565355
MSTRG.16096.9	down	4	14039916	14071176	ENSRNOG00000040108	RGD1565355	ENSRNOT00000008319	up	4	14151414	14188215	ENSRNOG00000040108	RGD1565355
MSTRG.16535.2	up	4	82160367	82161654	MSTRG.16535	.	ENSRNOT00000074452	down	4	82174967	82177420	ENSRNOG00000048917	Hoxa6
MSTRG.16214.2	up	4	40005426	40036563	ENSRNOG00000057290	Tmem168	MSTRG.16213.2	down	4	40004654	40005355	ENSRNOG00000031045	LOC100911252
MSTRG.8019.2	down	14	86357933	86447932	ENSRNOG00000004670	Ddx56	ENSRNOT00000083394	up	14	86414949	86613327	ENSRNOG00000005130	LOC103693780
MSTRG.8019.2	down	14	86357933	86447932	ENSRNOG00000004670	Ddx56	ENSRNOT00000057199	up	14	86414976	86480156	ENSRNOG00000005130	LOC103693780
MSTRG.23564.1	down	9	76743632	76758515	ENSRNOG00000027430	Ikzf2	ENSRNOT00000087779	down	9	76632112	76768770	ENSRNOG00000027430	Ikzf2
MSTRG.23318.1	down	9	43491370	43495986	ENSRNOG00000057258	AABR07067404.2	MSTRG.23315.2	down	9	43356826	43515719	ENSRNOG00000017265	Tmem131
MSTRG.23316.1	down	9	43446150	43453239	ENSRNOG00000017265	Tmem131	MSTRG.23315.2	down	9	43356826	43515719	ENSRNOG00000017265	Tmem131
MSTRG.23316.1	down	9	43446150	43453239	ENSRNOG00000017265	Tmem131	ENSRNOT00000023036	down	9	43331155	43353113	ENSRNOG00000016995	Zap70
MSTRG.23315.6	down	9	43455225	43515681	ENSRNOG00000057258	AABR07067404.2	MSTRG.23315.2	down	9	43356826	43515719	ENSRNOG00000017265	Tmem131
MSTRG.23025.3	down	9	9980335	9982456	ENSRNOG00000046050	Dennd1c	ENSRNOT00000080856	down	9	9980720	9985358	ENSRNOG00000047322	Crb3
MSTRG.23025.3	down	9	9980335	9982456	ENSRNOG00000046050	Dennd1c	ENSRNOT00000071515	down	9	9909948	9912276	ENSRNOG00000045595	Tnfsf9
MSTRG.23828.2	up	9	101106892	101388833	ENSRNOG00000051180	Chchd2	ENSRNOT00000080892	down	9	101107074	101107535	ENSRNOG00000051286	LOC100911516
MSTRG.23828.2	up	9	101106892	101388833	ENSRNOG00000051180	Chchd2	ENSRNOT00000025743	down	9	101025313	101038625	ENSRNOG00000019043	Pdcd1
MSTRG.23828.2	up	9	101106892	101388833	ENSRNOG00000051180	Chchd2	ENSRNOT00000074915	down	9	101307764	101319845	ENSRNOG00000049797	NEWGENE_1311658
MSTRG.5699.1	down	12	1877193	2019684	ENSRNOG00000028100	Pex11g	MSTRG.5703.1	down	12	2054680	2068682	ENSRNOG00000000975	Mcoln1
MSTRG.6337.2	up	12	40381855	40476706	ENSRNOG00000037815	Acad10	MSTRG.6341.1	up	12	40466397	40498854	ENSRNOG00000001344	Aldh2
MSTRG.9731.1	down	17	9549064	9609231	ENSRNOG00000021886	B4galt7	ENSRNOT00000018232	down	17	9639330	9644090	ENSRNOG00000013564	Dok3
MSTRG.14684.1	down	3	28849436	28857696	ENSRNOG00000031168	Arhgap15	ENSRNOT00000049884	down	3	28627084	29236219	ENSRNOG00000031168	Arhgap15
MSTRG.14682.1	down	3	28803068	28813147	ENSRNOG00000031168	Arhgap15	ENSRNOT00000049884	down	3	28627084	29236219	ENSRNOG00000031168	Arhgap15
MSTRG.14685.1	down	3	28858338	28894906	ENSRNOG00000031168	Arhgap15	ENSRNOT00000049884	down	3	28627084	29236219	ENSRNOG00000031168	Arhgap15
MSTRG.14681.1	down	3	28776630	28784097	ENSRNOG00000031168	Arhgap15	ENSRNOT00000049884	down	3	28627084	29236219	ENSRNOG00000031168	Arhgap15
ENSRNOT00000083380	down	3	114650518	114652214	ENSRNOG00000052651	LOC102556085	ENSRNOT00000024658	up	3	114355798	114647382	ENSRNOG00000028668	Slc28a2
MSTRG.14653.1	down	3	21927488	21947368	MSTRG.14653	.	ENSRNOT00000066377	up	3	21830822	21904270	ENSRNOG00000010150	Strbp
MSTRG.15016.5	down	3	80858060	80861127	ENSRNOG00000017737	Dgkz	ENSRNOT00000091265	down	3	80844033	80875817	ENSRNOG00000017737	Dgkz
MSTRG.15016.5	down	3	80858060	80861127	ENSRNOG00000017737	Dgkz	ENSRNOT00000033978	up	3	80841005	80842916	ENSRNOG00000017560	Mdk
MSTRG.14571.3	down	3	17866718	17872245	MSTRG.14571	.	MSTRG.14571.2	down	3	17648814	17867321	ENSRNOG00000052953	AABR07051592.1
MSTRG.3377.1	down	10	23695403	23744436	ENSRNOG00000028845	Ebf1	ENSRNOT00000076664	down	10	23661013	24049460	ENSRNOG00000028845	Ebf1
MSTRG.4246.1	down	10	75049693	75054715	ENSRNOG00000035633	Mir142	ENSRNOT00000081951	down	10	75088422	75098258	ENSRNOG00000008310	Mpo
MSTRG.4150.2	down	10	70438042	70444908	MSTRG.4150	.	ENSRNOT00000088198	up	10	70520206	70621965	ENSRNOG00000061543	Ap2b1
MSTRG.5009.1	down	10	112560406	112597035	ENSRNOG00000037220	AABR07031089.1	ENSRNOT00000056238	up	10	112564256	112565146	ENSRNOG00000037220	AABR07031089.1
MSTRG.4936.1	up	10	109513022	109636157	ENSRNOG00000048712	Ccdc137	ENSRNOT00000071432	down	10	109614965	109618807	ENSRNOG00000046076	Tspan10
MSTRG.4936.1	up	10	109513022	109636157	ENSRNOG00000048712	Ccdc137	MSTRG.4934.1	up	10	109432503	109520846	ENSRNOG00000036701	LOC100361457
MSTRG.4109.2	up	10	67649047	67805382	ENSRNOG00000000236	Zfp207	ENSRNOT00000031746	down	10	67862054	67863255	ENSRNOG00000021685	Cdk5r1
MSTRG.4109.2	up	10	67649047	67805382	ENSRNOG00000000236	Zfp207	ENSRNOT00000064285	down	10	67810655	67857223	ENSRNOG00000005538	Psmd11
MSTRG.19291.25	down	6	30640365	30641352	ENSRNOG00000050156	AABR07063425.2	ENSRNOT00000082885	up	6	30638733	30639143	ENSRNOG00000060896	AABR07063424.1
MSTRG.19085.1	down	6	6570424	6586815	MSTRG.19085	.	ENSRNOT00000080013	up	6	6619081	6674554	ENSRNOG00000030294	Eml4
MSTRG.19519.8	up	6	76652046	76661889	ENSRNOG00000033776	LOC100359668	MSTRG.19519.2	down	6	76386430	76599538	ENSRNOG00000046256	Ralgapa1
MSTRG.19519.8	up	6	76652046	76661889	ENSRNOG00000033776	LOC100359668	MSTRG.19519.3	up	6	76386976	76599548	ENSRNOG00000046256	Ralgapa1
MSTRG.11628.1	down	19	55807022	55861505	MSTRG.11628	.	ENSRNOT00000047754	up	19	55880561	55913598	ENSRNOG00000015150	Spg7
MSTRG.11067.1	down	19	10904203	10942310	ENSRNOG00000048222	Nlrc5	MSTRG.11067.3	down	19	10948046	11003708	ENSRNOG00000048222	Nlrc5
MSTRG.11628.2	down	19	55841792	55861505	MSTRG.11628	.	ENSRNOT00000047754	up	19	55880561	55913598	ENSRNOG00000015150	Spg7
MSTRG.17806.3	down	5	60264950	60349645	ENSRNOG00000013078	Zcchc7	ENSRNOT00000033373	down	5	60007587	60191941	ENSRNOG00000024729	Pax5
MSTRG.18604.8	down	5	150524748	150531093	ENSRNOG00000052548	RF00045	ENSRNOT00000085482	down	5	150509040	150520884	ENSRNOG00000050106	Rcc1
MSTRG.18604.8	down	5	150524748	150531093	ENSRNOG00000052548	RF00045	ENSRNOT00000074374	up	5	150546430	150609352	ENSRNOG00000046922	Phactr4
MSTRG.18754.4	down	5	156343592	156372644	MSTRG.18754	.	MSTRG.18754.2	up	5	156343577	156564988	ENSRNOG00000014368	Eif4g3
ENSRNOT00000077204	down	5	133799175	133802097	ENSRNOG00000057688	AABR07049695.4	ENSRNOT00000010318	up	5	133759735	133786452	ENSRNOG00000007775	Cmpk1
MSTRG.17870.1	up	5	70242609	70374401	ENSRNOG00000055089	Slc44a1	ENSRNOT00000087517	up	5	70441123	70511659	ENSRNOG00000059876	Fsd1l
MSTRG.6813.1	down	13	55124330	55146381	ENSRNOG00000000655	Ptprc	ENSRNOT00000064785	down	13	55061562	55173692	ENSRNOG00000000655	Ptprc
MSTRG.6813.1	down	13	55124330	55146381	ENSRNOG00000000655	Ptprc	ENSRNOT00000029878	down	13	55061562	55173692	ENSRNOG00000000655	Ptprc
MSTRG.6816.1	down	13	55160336	55169607	ENSRNOG00000000655	Ptprc	ENSRNOT00000064785	down	13	55061562	55173692	ENSRNOG00000000655	Ptprc
MSTRG.6816.1	down	13	55160336	55169607	ENSRNOG00000000655	Ptprc	ENSRNOT00000029878	down	13	55061562	55173692	ENSRNOG00000000655	Ptprc
MSTRG.22039.3	down	8	49304129	49308973	ENSRNOG00000016069	Cd3e	ENSRNOT00000091190	down	8	49297643	49301125	ENSRNOG00000016069	Cd3e
MSTRG.22039.3	down	8	49304129	49308973	ENSRNOG00000016069	Cd3e	ENSRNOT00000021488	down	8	49282460	49287110	ENSRNOG00000015994	Cd3d
MSTRG.22039.3	down	8	49304129	49308973	ENSRNOG00000016069	Cd3e	ENSRNOT00000085022	down	8	49232176	49271834	ENSRNOG00000026833	Ube4a
MSTRG.10717.1	down	18	44754545	44758779	ENSRNOG00000026136	Tnfaip8	ENSRNOT00000086431	down	18	44716226	44779903	ENSRNOG00000026136	Tnfaip8
MSTRG.21576.4	down	7	142244295	142261442	ENSRNOG00000048932	Smagp	ENSRNOT00000048262	down	7	142273833	142300382	ENSRNOG00000031930	Bin2
MSTRG.20404.1	up	7	12457848	12458822	MSTRG.20404	.	ENSRNOT00000060648	down	7	12541061	12741296	ENSRNOG00000013220	Arhgap45
MSTRG.20404.1	up	7	12457848	12458822	MSTRG.20404	.	ENSRNOT00000060683	up	7	12440751	12457513	ENSRNOG00000014287	Stk11
MSTRG.13501.38	down	20	2884388	2887069	MSTRG.13501	.	MSTRG.13501.31	down	20	2878047	2942133	ENSRNOG00000049946	AABR07044340.1
MSTRG.13501.38	down	20	2884388	2887069	MSTRG.13501	.	MSTRG.13501.33	down	20	2878047	2944047	ENSRNOG00000000446	LOC100911983
MSTRG.13501.38	down	20	2884388	2887069	MSTRG.13501	.	MSTRG.13501.35	up	20	2878047	2920891	ENSRNOG00000000446	LOC100911983
ENSRNOT00000065330	down	20	5282945	5284025	ENSRNOG00000045908	AABR07044416.1	ENSRNOT00000089411	down	20	5184515	5186503	ENSRNOG00000058566	Ltb
ENSRNOT00000065330	down	20	5282945	5284025	ENSRNOG00000045908	AABR07044416.1	ENSRNOT00000052270	up	20	5374985	5378539	ENSRNOG00000030712	RT1-A2
ENSRNOT00000065330	down	20	5282945	5284025	ENSRNOG00000045908	AABR07044416.1	MSTRG.13688.23	up	20	5351970	5377440	ENSRNOG00000030712	RT1-A2
MSTRG.13661.1	down	20	4886865	4906591	ENSRNOG00000051805	AABR07044408.1	MSTRG.13642.55	down	20	4789000	4921350	ENSRNOG00000039744	RT1-CE4
MSTRG.13661.1	down	20	4886865	4906591	ENSRNOG00000051805	AABR07044408.1	ENSRNOT00000061027	down	20	4638720	4792283	ENSRNOG00000050183	RT1-CE1
MSTRG.13661.1	down	20	4886865	4906591	ENSRNOG00000051805	AABR07044408.1	ENSRNOT00000001108	down	20	4861353	4863198	ENSRNOG00000000836	LOC103694381
MSTRG.13661.1	down	20	4886865	4906591	ENSRNOG00000051805	AABR07044408.1	MSTRG.13642.71	up	20	4892932	4934871	ENSRNOG00000039744	RT1-CE4
MSTRG.13661.1	down	20	4886865	4906591	ENSRNOG00000051805	AABR07044408.1	MSTRG.13642.10	up	20	4638229	4935487	ENSRNOG00000039744	RT1-CE4
ENSRNOT00000082491	down	20	4900092	4901178	ENSRNOG00000058987	AABR07044408.3	MSTRG.13642.55	down	20	4789000	4921350	ENSRNOG00000039744	RT1-CE4
ENSRNOT00000082491	down	20	4900092	4901178	ENSRNOG00000058987	AABR07044408.3	ENSRNOT00000001108	down	20	4861353	4863198	ENSRNOG00000000836	LOC103694381
ENSRNOT00000082491	down	20	4900092	4901178	ENSRNOG00000058987	AABR07044408.3	MSTRG.13642.71	up	20	4892932	4934871	ENSRNOG00000039744	RT1-CE4
ENSRNOT00000082491	down	20	4900092	4901178	ENSRNOG00000058987	AABR07044408.3	MSTRG.13642.10	up	20	4638229	4935487	ENSRNOG00000039744	RT1-CE4
MSTRG.13689.1	down	20	5335862	5419295	ENSRNOG00000061996	AABR07044420.1	ENSRNOT00000000554	down	20	5458509	5466265	ENSRNOG00000000474	Rgl2
MSTRG.13689.1	down	20	5335862	5419295	ENSRNOG00000061996	AABR07044420.1	ENSRNOT00000052270	up	20	5374985	5378539	ENSRNOG00000030712	RT1-A2
MSTRG.13689.1	down	20	5335862	5419295	ENSRNOG00000061996	AABR07044420.1	ENSRNOT00000044975	up	20	5468078	5476193	ENSRNOG00000029500	Tapbp
MSTRG.13689.1	down	20	5335862	5419295	ENSRNOG00000061996	AABR07044420.1	MSTRG.13688.23	up	20	5351970	5377440	ENSRNOG00000030712	RT1-A2
MSTRG.13438.1	down	20	134200	135527	MSTRG.13438	.	MSTRG.13436.5	up	20	130348	157665	ENSRNOG00000050210	RT1-CE10
MSTRG.13496.1	down	20	2643406	2650116	MSTRG.13496	.	ENSRNOT00000083833	down	20	2667524	2678141	ENSRNOG00000047657	C4a
MSTRG.13586.1	down	20	4093610	4093980	ENSRNOG00000033215	RT1-Db1	ENSRNOT00000083085	down	20	4118461	4125387	ENSRNOG00000030431	RT1-Db2
MSTRG.13586.1	down	20	4093610	4093980	ENSRNOG00000033215	RT1-Db1	ENSRNOT00000042571	down	20	4106189	4124780	ENSRNOG00000030431	RT1-Db2
MSTRG.13586.1	down	20	4093610	4093980	ENSRNOG00000033215	RT1-Db1	ENSRNOT00000000526	down	20	4020317	4026346	ENSRNOG00000000454	RT1-DOb
MSTRG.13586.1	down	20	4093610	4093980	ENSRNOG00000033215	RT1-Db1	ENSRNOT00000077630	down	20	4131722	4132604	ENSRNOG00000032844	RT1-Da
MSTRG.13690.1	down	20	5336884	5381071	ENSRNOG00000061996	AABR07044420.1	ENSRNOT00000000554	down	20	5458509	5466265	ENSRNOG00000000474	Rgl2
MSTRG.13690.1	down	20	5336884	5381071	ENSRNOG00000061996	AABR07044420.1	ENSRNOT00000052270	up	20	5374985	5378539	ENSRNOG00000030712	RT1-A2
MSTRG.13690.1	down	20	5336884	5381071	ENSRNOG00000061996	AABR07044420.1	ENSRNOT00000044975	up	20	5468078	5476193	ENSRNOG00000029500	Tapbp
MSTRG.13690.1	down	20	5336884	5381071	ENSRNOG00000061996	AABR07044420.1	MSTRG.13688.23	up	20	5351970	5377440	ENSRNOG00000030712	RT1-A2
MSTRG.24207.1	down	X	34306570	34397014	ENSRNOG00000056404	RF00026	MSTRG.24206.1	up	X	34192675	34303724	ENSRNOG00000030228	LOC688932
